# Supplementary material for: HANZE: a pan-European database of exposure to natural hazards and damaging historical floods since 1870
Source: Copernicus journal article supplement (doi:10.5194/essd-10-565-2018), 2018-03-16
Supplement: Supplementary file 1 [file essd-10-565-2018-supplement.zip]

Archive with 3 entries (3 files):
- File2_Population_validation.xlsx
- File1_Supplementary_Information.pdf
- essd-10-565-2018-supplement-title-page.pdf
