# Supplementary material for: HANZE: a pan-European database of exposure to natural hazards and damaging historical floods since 1870
Source: Copernicus journal article supplement (doi:10.5194/essd-10-565-2018), 2018-03-16
Supplement: Supplementary file 1 [file essd-10-565-2018-supplement.zip › essd-10-565-2018-supplement-title-page.pdf]

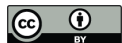

*Supplement of*

**Aircraft and ground measurements of dust aerosols over the west African coast in summer 2015 during ICE-D and AER-D**

**D. Liu et al.**

*Correspondence to:* Dantong Liu ([dantong.liu@manchester.ac.uk](mailto:dantong.liu@manchester.ac.uk))

The copyright of individual parts of the supplement might differ from the CC BY 4.0 License.
