# Supplementary material for: HANZE: a pan-European database of exposure to natural hazards and damaging historical floods since 1870
Source: Copernicus journal article supplement (doi:10.5194/essd-10-565-2018), 2018-03-16
Supplement: Supplementary file 1 [file File2_Population_validation.xlsx]

## Sheet: Validation
NUTS3	Units	Correct_1960	Fit_1960	Correct_1970	Fit_1970	Correct_1980	Fit_1980	Correct_1990	Fit_1990	Correct_2000	Fit_2000	Correct_2010	Fit_2010
AD000	1	0.91059	0.91059	0.904442	0.904442	0.898586	0.898586	0.893968	0.893968	0.88022	0.88022	0.91927	0.91927
AT111	28	0.874287	0.674891	0.8832	0.690884	0.902298	0.734958	0.942547	0.81319	0.953959	0.832856	0.993456	0.977232
AT112	71	0.817247	0.383965	0.812439	0.39929	0.825932	0.478834	0.8553	0.586794	0.895498	0.720699	0.983761	0.962506
AT113	72	0.896484	0.634149	0.907454	0.670827	0.925049	0.729558	0.946288	0.794103	0.956594	0.834218	0.988673	0.959729
AT121	93	0.826196	0.514313	0.838457	0.59435	0.871129	0.654256	0.897701	0.706264	0.918882	0.773818	0.981955	0.959191
AT122	102	0.878285	0.516169	0.878368	0.547359	0.890213	0.589795	0.912641	0.649522	0.942132	0.771406	0.977895	0.936843
AT123	40	0.928058	0.416898	0.904002	0.470833	0.909532	0.551111	0.921285	0.601246	0.938121	0.710134	0.981749	0.959024
AT124	111	0.911875	0.72526	0.920762	0.75231	0.929264	0.791587	0.942581	0.826044	0.957939	0.869591	0.985459	0.96037
AT125	61	0.927067	0.773459	0.926242	0.782948	0.926646	0.796909	0.932069	0.807231	0.945027	0.865192	0.995171	0.98815
AT126	91	0.85602	0.323125	0.860071	0.347032	0.859397	0.367905	0.875027	0.433786	0.909025	0.635624	0.979596	0.95607
AT127	75	0.780607	0.34431	0.780803	0.427971	0.789592	0.494218	0.831141	0.606628	0.882778	0.709667	0.979115	0.941314
AT130	1	1	0.997908	1	0.998924	1	0.998837	1	0.988923	0.999083	0.999083	1	0.990647
AT211	40	0.976802	0.387093	0.975185	0.397757	0.97778	0.471396	0.94474	0.535478	0.951119	0.684702	0.991756	0.956845
AT212	50	0.866111	0.482956	0.886707	0.581738	0.905935	0.681379	0.94152	0.787353	0.965714	0.877661	0.993072	0.974224
AT213	42	0.914218	0.663618	0.915706	0.6957	0.925949	0.763323	0.952169	0.851523	0.970564	0.915739	0.984659	0.967265
AT221	58	0.918357	0.409647	0.92382	0.42133	0.944003	0.464537	0.953372	0.496042	0.968963	0.613024	0.974092	0.919969
AT222	51	0.876732	0.585617	0.888479	0.639573	0.904423	0.699896	0.932056	0.757094	0.957085	0.849719	0.980848	0.960017
AT223	54	0.856085	0.602162	0.884228	0.723309	0.904468	0.760238	0.933826	0.786947	0.95695	0.856425	0.978183	0.960337
AT224	191	0.878491	0.620391	0.893002	0.670921	0.903658	0.714305	0.917071	0.750192	0.942963	0.848346	0.970797	0.93431
AT225	113	0.908637	0.611616	0.915616	0.669437	0.917605	0.713788	0.932388	0.759137	0.950217	0.848673	0.97819	0.948314
AT226	72	0.913566	0.622847	0.924502	0.696581	0.926196	0.770133	0.938675	0.788904	0.956565	0.854315	0.973614	0.927953
AT311	146	0.855905	0.572211	0.863724	0.639395	0.877239	0.685184	0.900628	0.738391	0.95318	0.88434	0.979773	0.950048
AT312	78	0.877331	0.430393	0.879845	0.479659	0.886082	0.533632	0.913119	0.602619	0.945101	0.733101	0.980335	0.937113
AT313	104	0.875963	0.520038	0.867161	0.561498	0.877354	0.627111	0.897101	0.6762	0.945694	0.851815	0.982024	0.962739
AT314	44	0.864903	0.461946	0.872244	0.528089	0.883959	0.577006	0.902697	0.620902	0.949244	0.834313	0.982891	0.959596
AT315	72	0.849922	0.463802	0.846801	0.513528	0.856266	0.568812	0.886182	0.658185	0.946728	0.858886	0.977207	0.950215
AT321	15	0.850172	0.686111	0.861758	0.713542	0.908687	0.780672	0.942978	0.834985	0.967916	0.903092	0.984933	0.938784
AT322	53	0.872224	0.327904	0.862393	0.418982	0.845634	0.529345	0.878073	0.634044	0.938933	0.820855	0.987865	0.96734
AT323	51	0.902028	0.285815	0.889874	0.342615	0.870844	0.417302	0.888152	0.584861	0.937868	0.766265	0.977817	0.944644
AT331	37	0.872179	0.270905	0.874385	0.359396	0.889217	0.479689	0.904011	0.609486	0.955399	0.790705	0.986176	0.942026
AT332	66	0.890982	0.210658	0.845225	0.277041	0.842013	0.357122	0.852991	0.476099	0.917418	0.623862	0.968402	0.893287
AT333	33	0.855398	0.375731	0.826772	0.470259	0.840367	0.592089	0.869265	0.680802	0.918969	0.803015	0.960313	0.918813
AT334	54	0.775393	0.226375	0.760464	0.316258	0.797288	0.416129	0.845894	0.591337	0.888221	0.773866	0.974529	0.94058
AT335	89	0.874786	0.334414	0.861655	0.369046	0.862162	0.443229	0.872642	0.587213	0.909873	0.741006	0.971262	0.919531
AT341	48	0.847758	0.293095	0.85185	0.393964	0.869922	0.469979	0.89064	0.570255	0.933679	0.75016	0.97709	0.921777
AT342	48	0.827226	0.308534	0.824257	0.382356	0.844544	0.463591	0.876439	0.579723	0.926727	0.767831	0.974405	0.902097
BE100	19	0.836539	0.580283	0.872795	0.659539	0.886998	0.685414	0.894685	0.704249	0.912726	0.736336	0.965832	0.925513
BE211	30	0.821938	0.417483	0.821259	0.487037	0.867381	0.552992	0.941427	0.714257	0.965615	0.75067	0.982985	0.953145
BE212	13	0.771207	0.602494	0.802457	0.653105	0.851291	0.728492	0.903021	0.824233	0.94823	0.896767	0.994324	0.987711
BE213	27	0.822859	0.473176	0.831878	0.527909	0.846554	0.583907	0.877468	0.692789	0.942794	0.856139	0.995698	0.976651
BE221	18	0.687725	0.364631	0.766009	0.479795	0.784943	0.552886	0.844221	0.666207	0.932983	0.870249	0.992946	0.989185
BE222	13	0.782997	0.494533	0.781912	0.524714	0.786377	0.593009	0.834734	0.688813	0.953011	0.90613	0.996645	0.975161
BE223	13	0.775448	0.576213	0.781254	0.610974	0.81826	0.696495	0.87815	0.805845	0.960411	0.933681	0.997331	0.984401
BE231	10	0.809858	0.63919	0.825859	0.694178	0.860351	0.755415	0.891606	0.807083	0.954475	0.922023	0.994832	0.992373
BE232	10	0.792034	0.5997	0.82357	0.658665	0.865907	0.738012	0.905403	0.802795	0.960699	0.926768	0.992147	0.986328
BE233	6	0.903433	0.65831	0.920525	0.683345	0.934237	0.729598	0.943194	0.775659	0.982096	0.910717	0.996997	0.966864
BE234	21	0.834944	0.408828	0.859888	0.468589	0.901172	0.59485	0.930315	0.675092	0.97012	0.796866	0.9908	0.981884
BE235	11	0.936158	0.657802	0.938024	0.705919	0.935329	0.765473	0.940608	0.804099	0.959126	0.889038	0.991944	0.98654
BE236	7	0.843855	0.483274	0.864634	0.565893	0.884873	0.641854	0.928749	0.742323	0.959741	0.815002	0.994863	0.962998
BE241	35	0.844809	0.386694	0.85896	0.492714	0.885532	0.656065	0.90971	0.748893	0.939592	0.830984	0.983161	0.969158
BE242	30	0.809867	0.478157	0.820083	0.513176	0.836654	0.592142	0.894851	0.756143	0.950606	0.897561	0.993143	0.983103
BE251	10	0.823	0.519735	0.842209	0.600592	0.884054	0.723828	0.929513	0.818991	0.965011	0.896037	0.99483	0.986365
BE252	5	0.909154	0.685247	0.928474	0.745772	0.950203	0.817097	0.965896	0.856543	0.969342	0.882329	0.989869	0.987116
BE253	8	0.932142	0.606863	0.939188	0.629147	0.957559	0.704247	0.964327	0.744369	0.980995	0.821949	0.995203	0.961101
BE254	12	0.798122	0.588919	0.818038	0.664796	0.868035	0.771405	0.913546	0.85881	0.964558	0.941807	0.989826	0.982652
BE255	7	0.856948	0.370567	0.860069	0.442294	0.88505	0.58174	0.914726	0.739745	0.950644	0.8683	0.988628	0.985641
BE256	8	0.805687	0.645405	0.826435	0.673572	0.87626	0.733678	0.910251	0.788875	0.971485	0.913269	0.992776	0.982784
BE257	9	0.856216	0.551485	0.881611	0.663355	0.894867	0.724745	0.925566	0.816303	0.968831	0.928082	0.989945	0.981468
BE258	5	0.827807	0.517002	0.847762	0.566902	0.86607	0.617722	0.902643	0.700722	0.961581	0.851741	0.996322	0.985103
BE310	27	0.784605	0.536082	0.752321	0.529289	0.751817	0.583763	0.804506	0.672379	0.958267	0.930357	0.991729	0.978768
BE321	8	0.939642	0.678345	0.948509	0.722697	0.951416	0.765024	0.956297	0.795551	0.993694	0.974867	0.995814	0.991554
BE322	14	0.868045	0.612296	0.889999	0.606063	0.903303	0.664961	0.922143	0.713552	0.963568	0.933372	0.981933	0.975905
BE323	13	0.875372	0.684175	0.872035	0.695839	0.890744	0.746187	0.918653	0.807442	0.985115	0.945409	0.990129	0.973275
BE324	2	0.947347	0.866332	0.962426	0.885989	0.977211	0.910654	0.984972	0.92179	1	0.911559	1	0.907612
BE325	8	0.81079	0.700499	0.818901	0.717403	0.861156	0.76411	0.896218	0.83092	0.973712	0.95598	0.995007	0.980592
BE326	14	0.873342	0.497875	0.878666	0.512706	0.889202	0.603517	0.909697	0.695365	0.973552	0.938712	0.995613	0.981124
BE327	10	0.888859	0.632413	0.894668	0.631691	0.907067	0.707279	0.919933	0.764397	0.971022	0.93569	0.99678	0.974274
BE331	17	0.873402	0.563497	0.873765	0.539574	0.889472	0.606341	0.900804	0.674337	0.964276	0.904697	0.992565	0.981907
BE332	24	0.822524	0.619491	0.841492	0.625845	0.877188	0.679085	0.915542	0.745493	0.9739	0.953395	0.984941	0.975093
BE334	14	0.889321	0.461196	0.881807	0.492573	0.877652	0.569824	0.874643	0.635329	0.946922	0.867266	0.992132	0.980884
BE335	20	0.812082	0.572163	0.826872	0.589594	0.866249	0.657035	0.899279	0.716202	0.978531	0.921246	0.985167	0.968278
BE336	9	0.840681	0.395065	0.821933	0.403578	0.834948	0.445711	0.871535	0.636969	0.96319	0.904468	0.981021	0.979198
BE341	5	0.929265	0.516765	0.916998	0.527729	0.924919	0.57012	0.950881	0.645204	0.987978	0.795724	0.973444	0.967852
BE342	8	0.889568	0.618828	0.890056	0.641559	0.891649	0.687581	0.898912	0.745172	0.924554	0.852078	0.988705	0.986255
BE343	9	0.896815	0.436937	0.894263	0.441488	0.868178	0.497776	0.892104	0.646763	0.953776	0.888678	0.974901	0.962408
BE344	12	0.858202	0.715154	0.865702	0.734959	0.874255	0.75299	0.903382	0.799029	0.965444	0.913722	0.998057	0.992629
BE345	10	0.82585	0.625534	0.839549	0.655891	0.8593	0.701393	0.890289	0.76286	0.968054	0.926718	0.99648	0.987659
BE351	15	0.881358	0.521821	0.880087	0.533686	0.883176	0.571509	0.89524	0.64377	0.97057	0.891895	0.9919	0.981197
BE352	16	0.885001	0.384538	0.869303	0.452265	0.867406	0.602673	0.846998	0.654312	0.961311	0.942521	0.993418	0.985126
BE353	7	0.901539	0.6819	0.895494	0.673745	0.874357	0.703392	0.881734	0.761481	0.972775	0.949538	0.991345	0.987191
BG311	137	0.98614	0.42163	0.983289	0.495007	0.972631	0.580189	0.968559	0.626471	0.987865	0.718658	0.982462	0.861986
BG312	129	0.972354	0.390666	0.971885	0.492951	0.965536	0.605668	0.961334	0.665151	0.976886	0.753085	0.983731	0.907546
BG313	123	0.942201	0.331728	0.946291	0.393894	0.949165	0.509015	0.945752	0.705858	0.956338	0.778708	0.983614	0.895837
BG314	123	0.959365	0.41632	0.961326	0.500174	0.969986	0.644728	0.977855	0.710132	0.984698	0.787499	0.996834	0.913335
BG315	109	0.947388	0.465116	0.941552	0.576195	0.940723	0.626077	0.941082	0.678667	0.95374	0.771227	0.980897	0.912207
BG321	167	0.970701	0.413651	0.973992	0.499517	0.951323	0.641549	0.959561	0.685745	0.965266	0.727946	0.988163	0.871829
BG322	83	0.93953	0.477095	0.929857	0.551578	0.905793	0.585043	0.843554	0.614821	0.902031	0.684649	0.916756	0.797765
BG323	83	0.989513	0.281731	0.984862	0.544804	0.97925	0.692256	0.957122	0.730754	0.972258	0.802324	0.991869	0.923651
BG324	100	0.969879	0.527805	0.961252	0.642685	0.949733	0.706191	0.95355	0.796183	0.973465	0.837158	0.983151	0.915001
BG325	118	0.956723	0.367173	0.955467	0.450458	0.942209	0.610933	0.961207	0.733533	0.973033	0.778063	0.988042	0.878373
BG331	157	0.934706	0.300963	0.936851	0.318494	0.939122	0.363378	0.924978	0.43038	0.92872	0.471645	0.971375	0.873925
BG332	214	0.983094	0.370911	0.982206	0.396199	0.961722	0.543153	0.943283	0.643037	0.976051	0.69277	0.981599	0.831096
BG333	147	0.979027	0.444825	0.978334	0.600997	0.954654	0.686263	0.949507	0.781041	0.972997	0.814845	0.976547	0.88332
BG334	187	0.901514	0.393872	0.937162	0.492131	0.955118	0.627903	0.974504	0.676699	0.975915	0.71729	0.975848	0.850018
BG341	250	0.960683	0.406384	0.96365	0.384313	0.947068	0.504328	0.95926	0.649313	0.960689	0.69649	0.979356	0.866435
BG342	110	0.964737	0.274562	0.932039	0.42258	0.952481	0.554291	0.959214	0.704085	0.965731	0.778156	0.980845	0.903169
BG343	109	0.966908	0.385346	0.954555	0.378535	0.968345	0.485955	0.964079	0.666092	0.975574	0.734718	0.989204	0.879961
BG344	195	0.949247	0.379003	0.939137	0.404393	0.944299	0.620958	0.93752	0.725938	0.94565	0.770202	0.980129	0.857228
BG411	38	0.951489	0.100218	0.960276	0.134816	0.95235	0.247715	0.932779	0.256911	0.923983	0.25823	0.911027	0.888472
BG412	251	0.944973	0.393468	0.955025	0.476411	0.95229	0.551802	0.938319	0.631741	0.931781	0.73483	0.937948	0.838091
BG413	263	0.939297	0.396861	0.941069	0.381311	0.933232	0.488365	0.960229	0.632472	0.956899	0.708665	0.936258	0.8567
BG414	170	0.880375	0.228728	0.939519	0.317813	0.974015	0.430571	0.970275	0.548169	0.979318	0.590541	0.978185	0.737589
BG415	181	0.923531	0.351764	0.90826	0.402878	0.938817	0.48008	0.961862	0.533303	0.958614	0.615737	0.960907	0.797655
BG421	210	0.953275	0.282563	0.942919	0.314597	0.925305	0.542362	0.958038	0.678444	0.952042	0.739242	0.968953	0.888472
BG422	254	0.885218	0.339488	0.944112	0.411067	0.936261	0.528259	0.946501	0.580118	0.971803	0.6722	0.9694	0.835309
BG423	108	0.905662	0.37566	0.896176	0.479262	0.936217	0.602734	0.958116	0.781436	0.972972	0.840545	0.985612	0.92216
BG424	153	0.804051	0.436655	0.796015	0.494898	0.850281	0.605625	0.887849	0.672321	0.920427	0.740077	0.942329	0.86458
BG425	448	0.854245	0.49214	0.876287	0.501134	0.892453	0.558088	0.859668	0.623722	0.926532	0.600998	0.917034	0.798877
CH011	322	0.755367	0.243079	0.772223	0.335649	0.806921	0.441948	0.864665	0.577814	0.90019	0.691089	0.957064	0.881291
CH012	137	0.828661	0.223761	0.853842	0.273605	0.897444	0.324204	0.90696	0.461765	0.914801	0.583195	0.97719	0.868288
CH013	46	0.929688	0.25462	0.91119	0.331967	0.903125	0.433837	0.906432	0.563352	0.935919	0.681057	0.975147	0.852565
CH021	383	0.807136	0.328857	0.816647	0.403891	0.852214	0.554489	0.901008	0.7284	0.933885	0.795706	0.969774	0.912586
CH022	168	0.87276	0.230893	0.853964	0.279057	0.858407	0.349684	0.869267	0.500395	0.890262	0.664161	0.970448	0.91087
CH023	118	0.766437	0.330835	0.768963	0.421742	0.811964	0.554357	0.874554	0.739304	0.930363	0.85291	0.973225	0.926473
CH024	39	0.894645	0.403698	0.90054	0.517838	0.923367	0.631169	0.941966	0.73751	0.96748	0.834302	0.985037	0.946845
CH025	57	0.896627	0.401086	0.889653	0.4658	0.881748	0.667732	0.929366	0.808659	0.959849	0.881822	0.982854	0.933456
CH031	3	0.984526	0.410142	0.99846	0.580977	0.925703	0.908946	0.994372	0.952599	0.975289	0.925191	1	0.925274
CH032	86	0.870037	0.174917	0.845431	0.235167	0.840934	0.321139	0.890638	0.479437	0.932621	0.699216	0.971932	0.909658
CH033	217	0.595094	0.236874	0.607923	0.345678	0.69058	0.454092	0.800509	0.632625	0.893389	0.780336	0.971904	0.920505
CH040	173	0.78798	0.182211	0.778984	0.2768	0.789609	0.443981	0.837505	0.558999	0.904498	0.67075	0.974677	0.87969
CH051	4	0.796878	0.507869	0.851001	0.608546	0.878132	0.667211	0.933989	0.8129	0.946717	0.853992	1	0.96714
CH052	27	0.927454	0.304264	0.888214	0.341014	0.873798	0.450109	0.889305	0.662437	0.936605	0.740823	0.985365	0.920801
CH053	20	0.9058	0.543763	0.91056	0.570875	0.924225	0.643733	0.963071	0.803302	0.970914	0.908467	0.983312	0.937247
CH054	6	0.867021	0.525656	0.890874	0.563915	0.89874	0.574407	0.902343	0.627504	0.934287	0.780247	0.984648	0.937657
CH055	80	0.784265	0.317096	0.779697	0.417324	0.800579	0.515306	0.853829	0.687271	0.908811	0.803882	0.977319	0.945643
CH056	158	0.901456	0.350199	0.880129	0.387709	0.868544	0.469204	0.890448	0.631114	0.934762	0.799438	0.978494	0.912044
CH057	81	0.856856	0.327608	0.843772	0.389899	0.836699	0.487298	0.867797	0.657752	0.917562	0.78823	0.973741	0.933045
CH061	88	0.758783	0.292367	0.749366	0.351369	0.783992	0.451284	0.845324	0.573548	0.908462	0.734848	0.975081	0.935582
CH062	21	0.865762	0.473987	0.864309	0.485227	0.888634	0.575276	0.928806	0.728937	0.943537	0.825226	0.968526	0.925224
CH063	34	0.884314	0.224091	0.814353	0.320569	0.795399	0.413701	0.848286	0.552432	0.914535	0.712539	0.984892	0.942662
CH064	9	0.861683	0.283983	0.864604	0.295759	0.877312	0.443669	0.877007	0.519555	0.9113	0.705726	0.991616	0.96336
CH065	12	0.854912	0.263866	0.840164	0.267947	0.87274	0.427114	0.872128	0.547657	0.918109	0.699456	0.976951	0.911515
CH066	13	0.827317	0.304528	0.816805	0.30902	0.859559	0.440448	0.899202	0.541272	0.938878	0.693485	0.989468	0.893804
CH070	151	0.759725	0.229521	0.803548	0.343288	0.812778	0.431172	0.853884	0.586792	0.900643	0.720277	0.951484	0.8329
CY000	614	0.768182	0.203484	0.767382	0.206677	0.813099	0.230534	0.837586	0.27138	0.886771	0.362054	0.952038	0.873687
CZ010	1	1	0.999746	0.999986	0.999986	0.999321	0.999321	0.998873	0.998873	0.998587	0.998587	0.999075	0.999075
CZ020	1145	0.882894	0.533788	0.879504	0.557116	0.86789	0.583043	0.843618	0.585242	0.864662	0.658848	0.956475	0.892689
CZ031	623	0.959507	0.519093	0.942279	0.581215	0.931184	0.698664	0.90528	0.747886	0.923686	0.839086	0.973057	0.928759
CZ032	501	0.954968	0.549756	0.954882	0.638485	0.942616	0.739693	0.911147	0.758476	0.932963	0.820222	0.973383	0.92717
CZ041	132	0.919937	0.493882	0.919169	0.576676	0.897395	0.6816	0.870115	0.687732	0.9116	0.79218	0.959156	0.901755
CZ042	354	0.954336	0.441713	0.95484	0.527765	0.931753	0.665144	0.876073	0.701903	0.914293	0.82682	0.959403	0.907921
CZ051	215	0.963378	0.481833	0.9539	0.52844	0.931578	0.662288	0.887731	0.726706	0.925397	0.821766	0.971337	0.924307
CZ052	448	0.958083	0.569111	0.949859	0.65945	0.935014	0.762634	0.913414	0.800237	0.927134	0.860385	0.967119	0.913202
CZ053	451	0.954172	0.538433	0.945136	0.627761	0.934735	0.757179	0.922617	0.803281	0.937586	0.871171	0.976699	0.927924
CZ063	704	0.966553	0.586274	0.961219	0.656521	0.954996	0.759902	0.936417	0.814017	0.95094	0.879903	0.976263	0.925152
CZ064	673	0.927327	0.525484	0.927464	0.625148	0.929543	0.706145	0.916234	0.744792	0.932006	0.801086	0.975073	0.93359
CZ071	399	0.95206	0.475346	0.9391	0.590095	0.937848	0.750107	0.925198	0.810125	0.947471	0.887806	0.978993	0.935331
CZ072	305	0.946718	0.453077	0.941761	0.571295	0.940176	0.757098	0.936659	0.839878	0.959941	0.916279	0.983314	0.945422
CZ080	300	0.855016	0.635265	0.862629	0.70356	0.89587	0.782289	0.899942	0.823018	0.932477	0.879798	0.975823	0.943419
DE111	1	1	0.995826	1	0.993778	1	0.993473	1	0.993764	1	0.993778	1	0.994133
DE112	26	0.708608	0.267686	0.726968	0.372355	0.756245	0.575797	0.824085	0.7827	0.927029	0.908633	0.970292	0.952676
DE113	44	0.82641	0.20217	0.80641	0.296548	0.860585	0.486331	0.914774	0.677263	0.964488	0.790831	0.992545	0.967561
DE114	38	0.752752	0.429775	0.77573	0.464032	0.814929	0.581818	0.898279	0.765552	0.951607	0.896459	0.962658	0.940457
DE115	39	0.817151	0.236035	0.839616	0.327835	0.836013	0.476217	0.888682	0.64477	0.937878	0.790852	0.982471	0.967417
DE116	31	0.754663	0.522897	0.762419	0.552048	0.817911	0.665426	0.893481	0.783872	0.958754	0.883482	0.975317	0.951548
DE117	1	1	0.999384	1	0.99584	1	0.996882	1	0.998602	1	0.998617	1	0.998755
DE118	46	0.800784	0.356095	0.810203	0.384679	0.842766	0.496107	0.872644	0.660054	0.941172	0.870471	0.979121	0.961283
DE119	16	0.894517	0.450579	0.903177	0.467078	0.912518	0.530821	0.90951	0.637105	0.978358	0.906391	0.993272	0.973541
DE11A	30	0.918654	0.490111	0.934207	0.511351	0.905224	0.528978	0.914309	0.696534	0.973803	0.907855	0.994352	0.979869
DE11B	18	0.904639	0.522498	0.913083	0.522321	0.920824	0.577908	0.932476	0.741956	0.986749	0.945644	0.991958	0.975561
DE11C	11	0.856032	0.489616	0.877135	0.523631	0.889109	0.585248	0.909029	0.753793	0.968027	0.950507	0.98008	0.968147
DE11D	42	0.916441	0.482322	0.920922	0.506355	0.913093	0.559336	0.920857	0.754709	0.977492	0.939254	0.988935	0.974148
DE121	1	0.993549	0.993549	0.997048	0.997048	0.99625	0.99625	0.994533	0.994533	0.994662	0.994662	0.994629	0.994629
DE122	1	0.99508	0.99508	0.998625	0.998625	0.997871	0.997871	0.99645	0.99645	0.996733	0.996733	0.996976	0.996976
DE123	32	0.809547	0.274913	0.81992	0.313885	0.832269	0.466177	0.886921	0.635062	0.954123	0.820557	0.992506	0.972693
DE124	23	0.829171	0.391076	0.830967	0.434186	0.834599	0.50515	0.873916	0.746722	0.957267	0.893406	0.981198	0.958775
DE125	1	0.998571	0.998571	0.984342	0.984342	0.985881	0.985881	0.985924	0.985924	0.986926	0.986926	0.988054	0.988054
DE126	1	0.987905	0.987905	0.991126	0.991126	0.990489	0.990489	0.989377	0.989377	0.989963	0.989963	0.991776	0.991776
DE127	27	0.856609	0.466099	0.880282	0.534937	0.894282	0.602897	0.945211	0.805055	0.981287	0.930791	0.991965	0.970301
DE128	54	0.824544	0.248979	0.839346	0.34212	0.859729	0.484695	0.907055	0.676228	0.947828	0.826433	0.979244	0.951067
DE129	1	0.997828	0.997828	1	0.999319	0.999793	0.999793	0.99736	0.99736	0.997106	0.997106	0.997153	0.997153
DE12A	25	0.843896	0.266738	0.857495	0.31642	0.854479	0.474501	0.907682	0.735518	0.968434	0.879752	0.98123	0.950935
DE12B	28	0.812628	0.447173	0.817404	0.475189	0.826697	0.58171	0.891081	0.767439	0.956748	0.902932	0.983247	0.964101
DE12C	16	0.922778	0.424632	0.928584	0.439258	0.925445	0.512968	0.921673	0.661663	0.978314	0.900552	0.983229	0.952222
DE131	1	1	0.993464	1	0.989849	1	0.990389	1	0.990572	1	0.992462	1	0.992752
DE132	50	0.869875	0.293986	0.868468	0.336077	0.865455	0.497321	0.886764	0.634188	0.941406	0.835009	0.980764	0.954293
DE133	24	0.814036	0.43838	0.812172	0.462614	0.844535	0.556454	0.886363	0.667973	0.941408	0.821457	0.984042	0.970345
DE134	52	0.8742	0.375883	0.876272	0.386057	0.89477	0.470978	0.92263	0.590431	0.962984	0.844832	0.989074	0.971703
DE135	21	0.863984	0.576764	0.877169	0.601957	0.877783	0.628225	0.910198	0.78783	0.966489	0.92025	0.980511	0.955776
DE136	20	0.91957	0.559313	0.929918	0.597976	0.954703	0.692084	0.949547	0.801641	0.980868	0.925965	0.977163	0.953232
DE137	35	0.866108	0.216973	0.859194	0.258254	0.877316	0.372391	0.893741	0.569104	0.96636	0.862284	0.989639	0.976488
DE138	26	0.884558	0.425468	0.881179	0.438517	0.908733	0.485535	0.927333	0.586374	0.953794	0.713291	0.966632	0.922191
DE139	35	0.87232	0.380872	0.882125	0.40889	0.917297	0.440031	0.929808	0.545242	0.961467	0.723717	0.977522	0.927604
DE13A	32	0.875346	0.484928	0.888858	0.510558	0.910095	0.601237	0.944407	0.71546	0.978162	0.852386	0.986225	0.925203
DE141	27	0.888822	0.323949	0.892683	0.36584	0.903919	0.450632	0.914585	0.615549	0.958643	0.830137	0.969921	0.953625
DE142	15	0.710523	0.496783	0.714793	0.51707	0.749434	0.587012	0.842597	0.725201	0.920845	0.851045	0.965837	0.948001
DE143	25	0.907801	0.350183	0.892968	0.391362	0.888774	0.531281	0.908483	0.782665	0.976014	0.937003	0.986856	0.973085
DE144	1	1	0.9965	1	0.995488	0.994439	0.994439	0.991425	0.991425	0.992709	0.992709	0.993664	0.993664
DE145	55	0.882329	0.417774	0.877187	0.464086	0.897392	0.576198	0.910969	0.665909	0.96433	0.892984	0.987605	0.960648
DE146	45	0.879519	0.371064	0.884253	0.419975	0.894499	0.4981	0.90268	0.652285	0.960061	0.870142	0.98248	0.97188
DE147	24	0.756318	0.377831	0.793451	0.43426	0.860901	0.5363	0.906392	0.660821	0.942499	0.81899	0.975948	0.952094
DE148	39	0.930771	0.47998	0.934114	0.493909	0.928528	0.509326	0.92901	0.600881	0.962817	0.82903	0.980891	0.958003
DE149	25	0.860696	0.469568	0.868624	0.507026	0.859819	0.573051	0.89378	0.730918	0.983876	0.935082	0.987529	0.964488
DE211	1	1	0.998017	1	0.999012	1	0.999039	1	0.998512	1	0.99873	1	0.996339
DE212	1	1	0.996924	1	0.997963	1	0.998359	1	0.998452	1	0.999061	1	0.997318
DE213	1	1	0.984843	1	0.986692	1	0.987985	1	0.988711	1	0.989611	1	0.990032
DE214	24	0.888581	0.521482	0.899969	0.540048	0.919135	0.589842	0.932334	0.676196	0.957483	0.841441	0.974973	0.951631
DE215	17	0.915259	0.732453	0.905932	0.682312	0.916605	0.77842	0.940056	0.807736	0.969588	0.864713	0.98888	0.899963
DE216	23	0.884152	0.513722	0.873195	0.527853	0.880794	0.574871	0.905391	0.626342	0.934333	0.731947	0.963949	0.926132
DE217	17	0.689354	0.466454	0.665301	0.438602	0.762239	0.565573	0.842479	0.66864	0.945842	0.8218	0.993566	0.969183
DE218	24	0.911598	0.330595	0.869868	0.429726	0.837034	0.489041	0.843975	0.60537	0.919633	0.848867	0.987738	0.96553
DE219	31	0.847136	0.440281	0.854163	0.456345	0.860938	0.542242	0.845325	0.633578	0.923856	0.846273	0.990438	0.977246
DE21A	26	0.944402	0.439478	0.94166	0.413559	0.930356	0.457596	0.919359	0.582191	0.932226	0.768192	0.989162	0.96765
DE21B	24	0.90195	0.402359	0.914736	0.400833	0.928161	0.433494	0.93259	0.448748	0.938039	0.705327	0.986364	0.959444
DE21C	23	0.797237	0.342968	0.765094	0.389614	0.798297	0.532043	0.833496	0.656104	0.922102	0.794087	0.982678	0.962337
DE21D	23	0.895522	0.404301	0.894122	0.397855	0.932437	0.565618	0.921241	0.682122	0.959228	0.805667	0.981595	0.941844
DE21E	32	0.919885	0.255541	0.916742	0.262786	0.90173	0.31264	0.875761	0.456335	0.911897	0.71087	0.985587	0.96938
DE21F	17	0.916687	0.563758	0.920165	0.573186	0.91325	0.6327	0.939636	0.763164	0.931618	0.8103	0.985902	0.961804
DE21G	32	0.956911	0.59994	0.951842	0.602555	0.915603	0.616585	0.905022	0.714396	0.941572	0.853657	0.965956	0.936172
DE21H	32	0.853967	0.190782	0.837141	0.2609	0.814869	0.449881	0.843109	0.573481	0.907947	0.731853	0.974032	0.954225
DE21I	18	0.956888	0.452007	0.949777	0.465972	0.922644	0.506525	0.910496	0.669073	0.943258	0.866575	0.992258	0.976511
DE21J	19	0.863666	0.376701	0.856067	0.365745	0.86446	0.485655	0.867829	0.592982	0.929507	0.820693	0.980546	0.968708
DE21K	48	0.877292	0.487206	0.869984	0.468991	0.863447	0.551934	0.887684	0.671712	0.951804	0.838032	0.986075	0.938305
DE21L	15	0.826174	0.418307	0.806114	0.423395	0.821772	0.553142	0.851773	0.71889	0.923652	0.850765	0.976307	0.951574
DE21M	37	0.90199	0.568251	0.896919	0.580591	0.867619	0.585415	0.88553	0.712544	0.945923	0.875629	0.982444	0.963535
DE21N	34	0.954525	0.431615	0.952314	0.414189	0.950966	0.395494	0.945989	0.537598	0.944717	0.780852	0.990367	0.96941
DE221	1	0.986744	0.986744	0.986371	0.986371	0.987155	0.987155	0.989148	0.989148	0.989323	0.989323	0.991318	0.991318
DE222	1	1	0.943384	1	0.944725	1	0.944692	1	0.944464	1	0.945168	1	0.945033
DE223	1	1	0.997844	1	0.999525	1	0.999789	1	0.99976	0.999228	0.999228	0.999438	0.999438
DE224	26	0.929462	0.518342	0.928232	0.492927	0.937313	0.565822	0.939443	0.65393	0.958106	0.79684	0.986579	0.945672
DE225	38	0.857187	0.666716	0.858091	0.659898	0.872347	0.720286	0.935275	0.857038	0.964595	0.914546	0.985521	0.954448
DE226	28	0.900959	0.428392	0.900708	0.436334	0.897779	0.460545	0.883759	0.61024	0.941437	0.844928	0.978363	0.956704
DE227	35	0.8991	0.471127	0.895348	0.471934	0.891326	0.567739	0.910708	0.68387	0.942312	0.873741	0.9905	0.973368
DE228	38	0.861634	0.475571	0.842543	0.453893	0.844534	0.527568	0.885087	0.663484	0.937907	0.813887	0.977905	0.921528
DE229	24	0.936087	0.649899	0.92271	0.610084	0.910585	0.646585	0.961273	0.848489	0.981746	0.947938	0.985252	0.962425
DE22A	31	0.918304	0.616896	0.912148	0.614315	0.910219	0.657504	0.920914	0.759689	0.971716	0.897747	0.9863	0.95163
DE22B	37	0.825739	0.491492	0.824148	0.478905	0.843188	0.546756	0.88268	0.690998	0.933799	0.830304	0.986731	0.955477
DE22C	15	0.860085	0.497533	0.871235	0.515047	0.879187	0.590762	0.90942	0.735714	0.965221	0.909124	0.991548	0.978148
DE231	1	1	0.993412	1	0.995494	1	0.995956	1	0.995639	1	0.996369	1	0.994789
DE232	1	1	0.993723	1	0.997561	0.999992	0.999992	0.998859	0.998859	0.998324	0.998324	1	0.998886
DE233	1	1	0.995696	1	0.996899	1	0.997197	1	0.996969	1	0.997839	1	0.995258
DE234	29	0.88634	0.509546	0.864049	0.457182	0.867973	0.542367	0.91255	0.745707	0.975062	0.901624	0.99038	0.95266
DE235	38	0.87127	0.594887	0.835962	0.533247	0.840018	0.584092	0.90403	0.76295	0.943433	0.852811	0.976495	0.934808
DE236	20	0.904215	0.494372	0.910584	0.466347	0.895085	0.512544	0.897045	0.669363	0.959213	0.89117	0.988165	0.974167
DE237	42	0.772089	0.535213	0.788456	0.564545	0.833308	0.647854	0.897361	0.785682	0.955884	0.896933	0.980417	0.94964
DE238	44	0.850369	0.450571	0.838596	0.450203	0.83691	0.497136	0.882784	0.618691	0.934561	0.828871	0.987059	0.962391
DE239	36	0.922434	0.523449	0.905451	0.51409	0.896386	0.534174	0.924255	0.685357	0.96355	0.830203	0.990244	0.957558
DE23A	27	0.920463	0.750416	0.905297	0.737011	0.910992	0.776725	0.946836	0.887925	0.961793	0.912352	0.977959	0.957553
DE241	1	1	0.997128	0.994775	0.994775	0.994387	0.994387	0.994528	0.994528	0.993424	0.993424	0.993303	0.993303
DE242	1	1	0.998239	1	0.999696	1	0.999887	1	0.999834	0.999313	0.999313	0.99934	0.99934
DE243	1	0.994702	0.994702	0.992235	0.992235	0.991612	0.991612	0.991663	0.991663	0.990708	0.990708	0.991623	0.991623
DE244	1	1	0.992405	1	0.994147	1	0.994302	1	0.993291	1	0.994147	1	0.994167
DE245	46	0.847762	0.38363	0.852362	0.406736	0.872092	0.526072	0.895097	0.640264	0.956216	0.876503	0.987017	0.968788
DE246	47	0.854551	0.566548	0.84546	0.524954	0.856954	0.60572	0.907998	0.76422	0.965301	0.903223	0.989751	0.952941
DE247	20	0.880761	0.65039	0.866592	0.613169	0.887547	0.678586	0.911803	0.777677	0.98309	0.949285	0.988772	0.969625
DE248	29	0.834863	0.393283	0.835503	0.400983	0.856108	0.523479	0.886322	0.671949	0.943431	0.854603	0.977254	0.95497
DE249	31	0.918079	0.733584	0.914438	0.741172	0.919562	0.773656	0.937646	0.844152	0.980613	0.931437	0.989953	0.967679
DE24A	20	0.902079	0.591188	0.903202	0.594062	0.921891	0.657307	0.955917	0.815795	0.977872	0.913987	0.983693	0.965297
DE24B	22	0.901934	0.552423	0.905234	0.570875	0.921426	0.661337	0.932254	0.755039	0.978593	0.920097	0.99112	0.974937
DE24C	13	0.910022	0.640296	0.906054	0.605324	0.919408	0.759525	0.926595	0.86486	0.979988	0.958454	0.983837	0.966137
DE24D	28	0.909896	0.685842	0.915476	0.703316	0.938268	0.766836	0.967056	0.841546	0.986763	0.913158	0.996911	0.97213
DE251	1	1	0.999665	0.99785	0.99785	0.997961	0.997961	0.998445	0.998445	0.998186	0.998186	1	0.999776
DE252	1	1	0.971342	1	0.97745	1	0.981501	1	0.990336	1	0.991466	1	0.994074
DE253	1	0.99396	0.99396	0.992556	0.992556	0.992458	0.992458	0.992815	0.992815	0.995414	0.995414	0.995545	0.995545
DE254	1	1	0.992294	1	0.99401	0.999771	0.999771	0.998633	0.998633	0.997904	0.997904	0.998361	0.998361
DE255	1	1	0.995375	1	0.996386	1	0.994122	1	0.994594	1	0.995237	1	0.994058
DE256	59	0.896953	0.564796	0.881841	0.537621	0.876438	0.58212	0.919524	0.735909	0.979243	0.932195	0.990278	0.971532
DE257	35	0.862711	0.346558	0.846916	0.314832	0.848027	0.43296	0.875141	0.638311	0.937014	0.827565	0.978626	0.953639
DE258	14	0.730788	0.302981	0.625597	0.339179	0.692796	0.513894	0.77698	0.655854	0.927851	0.877397	0.983436	0.961172
DE259	41	0.823459	0.36636	0.809266	0.415115	0.87164	0.583361	0.916699	0.737049	0.962537	0.848867	0.980199	0.942561
DE25A	39	0.859128	0.541837	0.85098	0.542674	0.857992	0.61024	0.885547	0.729757	0.963167	0.90727	0.986168	0.969806
DE25B	21	0.850042	0.4021	0.847705	0.420564	0.866115	0.568332	0.904058	0.678861	0.961911	0.892619	0.992353	0.975485
DE25C	27	0.938027	0.55296	0.939112	0.544098	0.925171	0.607277	0.929424	0.760381	0.980321	0.924962	0.990372	0.976824
DE261	1	1	0.998197	0.999632	0.999632	0.999848	0.999848	1	0.999095	1	0.999734	1	0.99968
DE262	1	0.988697	0.988697	0.986745	0.986745	0.986624	0.986624	0.992784	0.992784	0.992147	0.992147	0.992217	0.992217
DE263	1	1	0.994286	1	0.996607	1	0.997209	1	0.996228	1	0.997538	1	0.997519
DE264	42	0.821599	0.375823	0.812126	0.418586	0.846526	0.539502	0.899646	0.735499	0.970042	0.890803	0.991359	0.963106
DE265	39	0.82943	0.604154	0.826267	0.621287	0.869397	0.73029	0.926398	0.842629	0.979933	0.946252	0.996363	0.984927
DE266	45	0.819158	0.491792	0.822613	0.499831	0.850882	0.586343	0.907128	0.765462	0.970118	0.905331	0.985826	0.961469
DE267	26	0.874865	0.536996	0.878872	0.56037	0.876403	0.595227	0.915639	0.76753	0.974106	0.914729	0.9879	0.969806
DE268	31	0.860743	0.521368	0.86444	0.527004	0.847513	0.583925	0.896654	0.711891	0.949615	0.871151	0.977763	0.954691
DE269	34	0.861467	0.355971	0.850547	0.366247	0.856714	0.457044	0.892064	0.629031	0.963331	0.866351	0.980858	0.946769
DE26A	51	0.881081	0.451352	0.871334	0.466618	0.889269	0.585044	0.912168	0.754818	0.97097	0.900084	0.991798	0.976113
DE26B	36	0.821868	0.4937	0.824897	0.543348	0.860202	0.688248	0.903933	0.814114	0.973337	0.944578	0.99102	0.976685
DE26C	55	0.8334	0.36781	0.83549	0.413479	0.857085	0.510144	0.887116	0.595554	0.949985	0.832911	0.984475	0.97092
DE271	1	1	0.980027	1	0.981664	1	0.981039	1	0.977849	1	0.977375	1	0.977987
DE272	1	1	0.994028	1	0.995328	1	0.99593	1	0.995894	1	0.996922	1	0.997276
DE273	1	1	0.990894	1	0.989824	1	0.982257	1	0.98383	1	0.985095	1	0.986271
DE274	1	0.990488	0.990488	0.988981	0.988981	0.989306	0.989306	0.995167	0.995167	1	0.99907	1	0.999854
DE275	24	0.899904	0.319421	0.897212	0.368356	0.878217	0.481596	0.892297	0.612267	0.946644	0.835769	0.990314	0.976879
DE276	47	0.803381	0.288135	0.790535	0.324551	0.818214	0.401938	0.86113	0.538003	0.941807	0.806658	0.980295	0.960657
DE277	27	0.899914	0.420431	0.895646	0.404539	0.899842	0.509204	0.919482	0.641649	0.969829	0.881633	0.993835	0.9809
DE278	36	0.920098	0.421535	0.905234	0.446281	0.914326	0.593264	0.922667	0.702657	0.970143	0.884794	0.994038	0.984402
DE279	21	0.868571	0.294103	0.88277	0.351917	0.898267	0.454651	0.910602	0.576213	0.957661	0.73523	0.99051	0.970211
DE27A	20	0.724987	0.614711	0.717751	0.617454	0.785979	0.720024	0.874487	0.846081	0.938534	0.907022	0.983697	0.948725
DE27B	45	0.918137	0.45019	0.917123	0.467326	0.904342	0.535881	0.908066	0.698582	0.951896	0.893088	0.990569	0.980606
DE27C	53	0.867057	0.438733	0.855908	0.44906	0.848978	0.535178	0.885404	0.674538	0.946604	0.872925	0.987609	0.977774
DE27D	47	0.888374	0.469158	0.877215	0.454536	0.88518	0.544494	0.907768	0.703315	0.965088	0.908022	0.98896	0.974156
DE27E	29	0.89668	0.572259	0.879365	0.556897	0.884885	0.632457	0.896118	0.728969	0.941676	0.83668	0.981706	0.94522
DE300	1	1	0.996689	1	0.997031	1	0.996739	1	0.99779	1	0.998049	1	0.998024
DE401	1	0.996008	0.996008	1	0.998401	1	0.998736	1	0.996451	0.998243	0.998243	0.997734	0.997734
DE402	1	0.996128	0.996128	1	0.997495	1	0.997799	1	0.994391	0.999789	0.999789	0.99951	0.99951
DE403	1	1	0.9899	1	0.981265	1	0.985848	1	0.984681	1	0.989125	1	0.988944
DE404	1	0.99681	0.99681	1	0.994047	1	0.995021	1	0.994868	0.999709	0.999709	0.999452	0.999452
DE405	25	0.915037	0.349302	0.944429	0.505791	0.934493	0.608507	0.922486	0.6396	0.950335	0.779875	0.974174	0.939193
DE406	37	0.898321	0.443659	0.920801	0.527793	0.914942	0.571349	0.916057	0.576486	0.955959	0.733785	0.985886	0.950929
DE407	33	0.873324	0.474151	0.926569	0.739555	0.937455	0.801494	0.955239	0.867117	0.97567	0.907036	0.988405	0.963905
DE408	26	0.922935	0.254129	0.92857	0.347876	0.929926	0.403947	0.929777	0.405069	0.94758	0.552552	0.990757	0.971414
DE409	45	0.895548	0.72063	0.919292	0.743845	0.910476	0.798066	0.901708	0.799007	0.96645	0.884109	0.989371	0.964036
DE40A	19	0.857701	0.351051	0.868248	0.380067	0.867533	0.402337	0.872805	0.420776	0.931532	0.648348	0.979554	0.956736
DE40B	25	0.9287	0.230506	0.958884	0.606443	0.955864	0.783407	0.948851	0.872865	0.96963	0.886946	0.970944	0.947396
DE40C	38	0.89418	0.383486	0.833577	0.678371	0.796511	0.704401	0.792764	0.737144	0.94244	0.90747	0.981427	0.955447
DE40D	23	0.933612	0.428603	0.950711	0.684188	0.94249	0.808493	0.940656	0.871903	0.982837	0.925806	0.990369	0.95896
DE40E	38	0.854158	0.282062	0.872984	0.387117	0.879806	0.438948	0.888929	0.469184	0.955294	0.702464	0.986523	0.960852
DE40F	26	0.929619	0.494722	0.954515	0.722204	0.954062	0.819467	0.960247	0.833811	0.984731	0.88865	0.994609	0.966232
DE40G	30	0.936072	0.330797	0.906207	0.645883	0.881188	0.707233	0.885947	0.712427	0.979389	0.904223	0.991687	0.959227
DE40H	16	0.875313	0.351486	0.897162	0.470045	0.904644	0.556285	0.88557	0.558726	0.929114	0.701096	0.984769	0.968673
DE40I	34	0.951758	0.264072	0.928566	0.498399	0.930414	0.737051	0.934712	0.83194	0.976444	0.88896	0.991708	0.963601
DE501	1	1	0.997878	1	0.997749	1	0.99239	1	0.996227	1	0.998558	1	0.997669
DE502	1	1	0.976811	1	0.976567	1	0.971688	1	0.976067	1	0.977521	1	0.9789
DE600	1	1	0.996604	1	0.99626	1	0.995994	1	0.995889	1	0.997291	1	0.997542
DE711	1	1	0.992596	1	0.998556	1	0.999023	1	0.999093	0.997993	0.997993	0.996659	0.996659
DE712	1	1	0.992628	1	0.998045	1	0.998856	1	0.99831	0.999128	0.999128	0.99894	0.99894
DE713	1	1	0.991314	1	0.996197	1	0.996838	1	0.997704	0.999311	0.999311	0.998706	0.998706
DE714	1	1	0.992873	1	0.996885	1	0.997187	1	0.997111	1	0.999123	1	0.999333
DE715	23	0.855507	0.399548	0.884244	0.445952	0.911107	0.575243	0.931999	0.707868	0.968639	0.874323	0.9908	0.967981
DE716	23	0.816295	0.373804	0.816672	0.446048	0.851257	0.592123	0.894105	0.729907	0.946612	0.853156	0.979716	0.952082
DE717	14	0.744968	0.403223	0.744075	0.483992	0.806396	0.632795	0.852715	0.720809	0.929362	0.884054	0.968413	0.955245
DE718	13	0.601242	0.379817	0.668263	0.478928	0.800342	0.712797	0.873257	0.827113	0.959092	0.941465	0.989592	0.979994
DE719	30	0.774112	0.480606	0.763523	0.516927	0.822267	0.622164	0.87103	0.701808	0.943469	0.836204	0.978521	0.965252
DE71A	12	0.878673	0.522573	0.830327	0.525956	0.845683	0.596645	0.883161	0.688212	0.944526	0.853989	0.97771	0.959976
DE71B	15	0.900173	0.522368	0.901226	0.497751	0.896262	0.551411	0.917053	0.668893	0.966679	0.847494	0.985757	0.94596
DE71C	13	0.841801	0.272851	0.796289	0.359317	0.841497	0.54021	0.893252	0.67249	0.951431	0.843722	0.985909	0.972073
DE71D	17	0.856648	0.473247	0.856925	0.486951	0.879707	0.667992	0.908559	0.755047	0.970748	0.905286	0.988636	0.964374
DE71E	25	0.8396	0.537727	0.822804	0.525056	0.851164	0.635631	0.876342	0.717726	0.948874	0.854504	0.979849	0.960428
DE721	18	0.81597	0.576863	0.84004	0.598108	0.890398	0.717002	0.920664	0.790125	0.961139	0.856693	0.975542	0.958565
DE722	23	0.880185	0.63834	0.881852	0.62917	0.908038	0.69398	0.935387	0.785587	0.985824	0.94952	0.994662	0.986311
DE723	19	0.900453	0.574151	0.884899	0.515761	0.913705	0.617439	0.934265	0.74499	0.978096	0.930683	0.991403	0.982603
DE724	22	0.906641	0.530608	0.91115	0.507879	0.930134	0.660759	0.9428	0.758541	0.959565	0.88841	0.964613	0.952052
DE725	19	0.906327	0.700509	0.896093	0.703033	0.904435	0.748074	0.940503	0.833543	0.980439	0.936542	0.99311	0.984895
DE731	1	1	0.984155	1	0.989678	1	0.989184	1	0.987661	1	0.987036	1	0.985961
DE732	23	0.913424	0.557537	0.926026	0.518166	0.943195	0.590978	0.938318	0.645594	0.974293	0.859195	0.990949	0.971174
DE733	20	0.940689	0.627066	0.942828	0.634715	0.955873	0.740833	0.970043	0.85806	0.981731	0.935245	0.985888	0.973784
DE734	30	0.854707	0.524444	0.860995	0.562626	0.899034	0.685123	0.926873	0.780622	0.970272	0.917003	0.976267	0.945216
DE735	27	0.889106	0.608922	0.884832	0.579252	0.906131	0.676616	0.93319	0.773036	0.979418	0.929243	0.989678	0.973816
DE736	22	0.908115	0.542022	0.902361	0.51324	0.905796	0.61009	0.92716	0.721842	0.976249	0.922851	0.984834	0.964019
DE737	17	0.912977	0.693901	0.912243	0.719967	0.944573	0.825501	0.964775	0.892879	0.978752	0.935569	0.987982	0.980327
DE801	1	0.999962	0.999962	0.980731	0.980731	0.983865	0.983865	0.987612	0.987612	0.996656	0.996656	0.997479	0.997479
DE802	1	1	0.999349	0.989586	0.989586	0.987947	0.987947	0.999407	0.999407	1	0.992444	1	0.990242
DE803	1	0.99873	0.99873	0.98982	0.98982	0.989084	0.989084	0.991781	0.991781	1	0.998908	1	0.994796
DE804	1	1	0.999007	0.990561	0.990561	0.989284	0.989284	0.991767	0.991767	1	0.998094	1	0.998414
DE805	1	1	0.992736	1	0.997664	1	0.999064	1	0.99618	1	0.986087	1	0.985955
DE806	1	1	0.994731	0.993627	0.993627	0.993099	0.993099	0.996535	0.996535	1	0.993302	1	0.993468
DE807	57	0.803702	0.360564	0.787547	0.372833	0.778491	0.417021	0.789413	0.445899	0.936343	0.813845	0.984772	0.949076
DE808	68	0.960938	0.640044	0.940336	0.645643	0.942001	0.754329	0.945866	0.829965	0.969418	0.876683	0.988532	0.955178
DE809	61	0.950919	0.557114	0.931305	0.68609	0.940059	0.77564	0.93118	0.803039	0.977876	0.864612	0.986085	0.947126
DE80A	89	0.90826	0.548646	0.890271	0.643583	0.869263	0.682562	0.862371	0.672073	0.977961	0.905635	0.986117	0.956164
DE80B	53	0.854259	0.558862	0.87511	0.663535	0.845132	0.687811	0.825643	0.668056	0.965824	0.885413	0.988832	0.96566
DE80C	51	0.977646	0.531045	0.960052	0.721636	0.939217	0.761001	0.925378	0.772674	0.97115	0.869017	0.98852	0.950685
DE80D	65	0.884293	0.517974	0.868575	0.597592	0.86523	0.650812	0.878845	0.674101	0.966838	0.877981	0.979634	0.949825
DE80E	89	0.871996	0.541128	0.867207	0.576726	0.857791	0.636582	0.855489	0.648319	0.958268	0.881771	0.978408	0.93841
DE80F	83	0.908249	0.581934	0.880511	0.614461	0.877914	0.707563	0.867582	0.717893	0.971382	0.879868	0.987637	0.953426
DE80G	68	0.906356	0.525638	0.893553	0.588364	0.883538	0.64845	0.874268	0.65789	0.962758	0.868381	0.985864	0.947805
DE80H	41	0.941177	0.476242	0.951428	0.669515	0.936238	0.767875	0.903179	0.768721	0.971146	0.873823	0.991548	0.950677
DE80I	50	0.933774	0.474784	0.959684	0.672236	0.940896	0.766091	0.937249	0.813537	0.980475	0.88402	0.987683	0.951318
DE911	1	1	0.993131	0.998098	0.998098	0.999472	0.999472	1	0.997354	0.995936	0.995936	0.996098	0.996098
DE912	1	1	0.991337	1	0.99975	1	0.998908	1	0.996065	0.998054	0.998054	0.997944	0.997944
DE913	1	1	0.988067	1	0.996827	1	0.99622	1	0.993619	1	0.999434	1	0.999531
DE914	42	0.861415	0.255475	0.855121	0.291407	0.85794	0.411241	0.824353	0.536315	0.928204	0.871454	0.989222	0.969469
DE915	29	0.973454	0.297606	0.975665	0.325735	0.96395	0.426103	0.965811	0.584696	0.968875	0.802208	0.97307	0.943854
DE916	15	0.94564	0.751197	0.938897	0.729221	0.948951	0.776501	0.974624	0.855008	0.980589	0.89189	0.985412	0.93408
DE917	31	0.8921	0.614559	0.920388	0.621335	0.930951	0.694176	0.946704	0.87576	0.969128	0.914082	0.985001	0.962962
DE918	12	0.917527	0.691344	0.908555	0.670469	0.92304	0.735535	0.958193	0.890694	0.967497	0.944993	0.980777	0.973946
DE919	17	0.888514	0.623899	0.879135	0.627945	0.919374	0.718854	0.975312	0.897828	0.990175	0.929277	0.982941	0.941157
DE91A	8	0.913201	0.661435	0.906113	0.661796	0.894852	0.669283	0.907989	0.71999	0.946153	0.850147	0.993088	0.984632
DE91B	39	0.872542	0.467915	0.865939	0.498005	0.884886	0.562684	0.914804	0.62499	0.959378	0.841409	0.963297	0.943205
DE922	46	0.933583	0.489707	0.930093	0.534218	0.923431	0.615545	0.941926	0.705903	0.960956	0.850168	0.975568	0.943174
DE923	8	0.888806	0.523176	0.902512	0.561409	0.924918	0.644041	0.951815	0.778151	0.986486	0.935889	0.99183	0.979532
DE925	40	0.940166	0.481093	0.937011	0.506186	0.937089	0.579521	0.953329	0.741937	0.978425	0.879454	0.983592	0.969142
DE926	39	0.945097	0.719397	0.943553	0.731191	0.949301	0.791295	0.971776	0.882107	0.980921	0.913395	0.982492	0.945911
DE927	36	0.858316	0.637666	0.858392	0.657925	0.886366	0.720093	0.91101	0.822044	0.969762	0.939307	0.979341	0.964297
DE928	38	0.924904	0.460826	0.922735	0.524258	0.919552	0.598533	0.929187	0.698005	0.962607	0.864987	0.972501	0.934078
DE929	21	0.825404	0.401318	0.859416	0.489484	0.873766	0.568456	0.902456	0.682651	0.94352	0.822966	0.982699	0.964258
DE931	25	0.886145	0.377192	0.896772	0.431501	0.91439	0.523436	0.918779	0.589732	0.948724	0.784435	0.975998	0.962207
DE932	50	0.948994	0.522906	0.942098	0.56399	0.955383	0.683352	0.963009	0.796353	0.970785	0.894005	0.982934	0.963631
DE933	42	0.874687	0.27941	0.821	0.379905	0.816776	0.504285	0.853121	0.632187	0.907467	0.791499	0.965498	0.936393
DE934	29	0.938319	0.640753	0.940638	0.667361	0.949551	0.733233	0.965247	0.820414	0.985258	0.907918	0.986945	0.96234
DE935	43	0.902337	0.352405	0.913626	0.373048	0.925545	0.429855	0.908702	0.50652	0.915886	0.720119	0.975963	0.951494
DE936	11	0.881206	0.356843	0.892898	0.451693	0.900463	0.538153	0.929202	0.656012	0.955865	0.817909	0.990506	0.975467
DE937	57	0.926551	0.376584	0.926198	0.419349	0.922384	0.542291	0.911041	0.653306	0.940313	0.87121	0.979064	0.949636
DE938	24	0.920206	0.485204	0.924063	0.520444	0.932968	0.582512	0.92228	0.645264	0.943525	0.82221	0.977057	0.943929
DE939	40	0.954487	0.290332	0.942867	0.317602	0.925357	0.444489	0.927892	0.59536	0.950782	0.817973	0.982481	0.960361
DE93A	27	0.943884	0.610188	0.94236	0.657205	0.942283	0.754597	0.958132	0.840456	0.982882	0.913919	0.987627	0.972213
DE93B	11	0.89316	0.486127	0.896567	0.518244	0.921297	0.622665	0.926816	0.668961	0.953551	0.832091	0.983932	0.972861
DE941	1	1	0.986815	1	0.992941	1	0.991419	1	0.9905	1	0.996608	1	0.996773
DE942	1	1	0.988401	1	0.996967	1	0.999629	1	0.996531	0.997397	0.997397	0.997488	0.997488
DE943	1	1	0.984624	1	0.993531	1	0.998574	1	0.995724	1	0.998921	1	0.998958
DE944	1	1	0.988684	1	0.997365	1	0.996518	1	0.994184	0.998066	0.998066	0.999233	0.999233
DE945	1	1	0.986847	1	0.995505	1	0.994911	1	0.993121	1	0.999168	1	0.999324
DE946	6	0.90024	0.655213	0.894142	0.656983	0.911879	0.701242	0.939457	0.785732	0.940585	0.827749	0.994288	0.987901
DE947	25	0.773155	0.468439	0.755198	0.500793	0.791249	0.583319	0.870934	0.655627	0.940878	0.820369	0.966613	0.935505
DE948	13	0.866194	0.475255	0.87557	0.49613	0.886345	0.533247	0.901238	0.600895	0.940424	0.826243	0.991718	0.978921
DE949	60	0.931417	0.329272	0.934997	0.374084	0.941495	0.465663	0.938091	0.581202	0.947587	0.774731	0.987445	0.973272
DE94A	8	0.890675	0.657535	0.884555	0.649751	0.885604	0.667018	0.919405	0.729469	0.958194	0.798122	0.945856	0.926163
DE94B	25	0.93075	0.503526	0.927505	0.534684	0.937489	0.598771	0.952998	0.646237	0.965199	0.732607	0.983985	0.924079
DE94C	20	0.92394	0.467393	0.930213	0.493696	0.935925	0.55289	0.928038	0.621195	0.942081	0.802999	0.981066	0.949665
DE94D	15	0.911683	0.385697	0.917213	0.434536	0.919885	0.513611	0.93023	0.618005	0.946566	0.721564	0.974011	0.938867
DE94E	34	0.839295	0.422205	0.827499	0.512627	0.821245	0.592935	0.867691	0.731143	0.949568	0.86993	0.978625	0.958881
DE94F	10	0.850909	0.541761	0.858132	0.563408	0.871531	0.61154	0.874642	0.604982	0.917457	0.740027	0.977474	0.957287
DE94G	9	0.921892	0.656526	0.92364	0.705524	0.935137	0.787929	0.931072	0.822098	0.972055	0.935763	0.987872	0.983439
DE94H	19	0.931013	0.523946	0.938446	0.597506	0.940384	0.672901	0.953763	0.75732	0.944593	0.861429	0.9784	0.932298
DEA11	1	1	0.995097	1	0.995192	1	0.99982	1	0.996785	0.999698	0.999698	1	0.998986
DEA12	1	1	0.983284	1	0.982232	1	0.985923	1	0.985231	1	0.989427	1	0.989623
DEA13	1	1	0.992262	1	0.992828	1	0.995485	1	0.993502	1	0.996958	1	0.997146
DEA14	1	1	0.988729	1	0.9883	1	0.992204	1	0.992714	1	0.99644	1	0.996473
DEA15	1	1	0.994112	1	0.993064	1	0.996397	1	0.994966	1	0.99824	1	0.99843
DEA16	1	0.993961	0.993961	0.998379	0.998379	0.994045	0.994045	0.996037	0.996037	0.993266	0.993266	0.992527	0.992527
DEA17	1	1	0.986069	1	0.984074	1	0.986844	1	0.984654	1	0.987671	1	0.988077
DEA18	1	1	0.995679	1	0.994723	1	0.998822	1	0.997678	0.999246	0.999246	0.998131	0.998131
DEA19	1	1	0.989731	1	0.988543	1	0.991775	1	0.990423	1	0.993472	1	0.993628
DEA1A	1	0.996953	0.996953	0.997885	0.997885	0.995954	0.995954	0.999208	0.999208	0.996389	0.996389	0.996975	0.996975
DEA1B	16	0.823812	0.654007	0.827497	0.656532	0.858972	0.700791	0.885993	0.747143	0.946684	0.886056	0.968811	0.949348
DEA1C	10	0.743724	0.463664	0.773911	0.557877	0.864126	0.772934	0.929574	0.892519	0.947433	0.918206	0.952699	0.927609
DEA1D	8	0.89112	0.397086	0.914415	0.524073	0.927678	0.720533	0.936006	0.828798	0.975591	0.920536	0.996208	0.981319
DEA1E	9	0.77971	0.550921	0.790225	0.565592	0.812265	0.599941	0.860985	0.693109	0.961891	0.926149	0.985886	0.974125
DEA1F	13	0.874533	0.480232	0.866996	0.523542	0.886643	0.580061	0.933932	0.764034	0.981907	0.948286	0.992126	0.977029
DEA22	1	0.986657	0.986657	0.988262	0.988262	0.988589	0.988589	0.991461	0.991461	0.991992	0.991992	0.99349	0.99349
DEA23	1	1	0.997407	1	0.99638	1	0.999524	1	0.998001	0.998693	0.998693	0.99838	0.99838
DEA24	1	1	0.995586	1	0.996063	1	0.998993	1	0.997371	0.999659	0.999659	0.999509	0.999509
DEA26	15	0.73348	0.652836	0.717626	0.639056	0.774161	0.711559	0.854555	0.815583	0.963849	0.934155	0.975843	0.9528
DEA27	10	0.8421	0.447865	0.866165	0.502816	0.880464	0.579775	0.918877	0.703801	0.954402	0.849727	0.98837	0.969561
DEA28	11	0.884602	0.554513	0.899259	0.582775	0.911953	0.590774	0.922738	0.660154	0.970912	0.863603	0.98811	0.972238
DEA29	10	0.814465	0.578835	0.867258	0.583733	0.879115	0.649274	0.896618	0.6921	0.961922	0.850091	0.991537	0.916101
DEA2A	13	0.852972	0.562164	0.866106	0.610244	0.884717	0.697411	0.925169	0.819665	0.972516	0.947223	0.97989	0.961314
DEA2B	8	0.697011	0.419388	0.745566	0.513789	0.832059	0.672315	0.910835	0.833624	0.979422	0.93934	0.994258	0.970402
DEA2C	19	0.776735	0.364342	0.784513	0.400858	0.827692	0.538406	0.85865	0.616935	0.940019	0.809877	0.974347	0.93501
DEA2D	10	0.831798	0.675377	0.84374	0.710772	0.862453	0.7489	0.877513	0.779438	0.914295	0.825106	0.930071	0.879422
DEA31	1	0.967506	0.967506	0.967782	0.967782	0.96744	0.96744	0.973784	0.973784	0.973509	0.973509	0.974123	0.974123
DEA32	1	1	0.994545	0.9954	0.9954	0.991275	0.991275	0.993778	0.993778	0.989442	0.989442	0.984465	0.984465
DEA33	1	1	0.999608	1	0.998115	0.999385	0.999385	1	0.998732	0.998234	0.998234	0.998245	0.998245
DEA34	17	0.763893	0.555271	0.786328	0.573871	0.827559	0.61644	0.855867	0.672564	0.942681	0.903934	0.972547	0.949728
DEA35	11	0.710036	0.376038	0.719655	0.434091	0.794656	0.589382	0.846921	0.699064	0.960707	0.906289	0.98641	0.963581
DEA36	10	0.732598	0.564257	0.774892	0.625154	0.855259	0.765579	0.934049	0.897972	0.969926	0.949879	0.983319	0.969484
DEA37	24	0.814048	0.586722	0.825309	0.598344	0.859379	0.635558	0.90238	0.707735	0.958319	0.845063	0.984327	0.972473
DEA38	13	0.709843	0.4199	0.731996	0.475617	0.791941	0.584904	0.861014	0.720333	0.955883	0.911756	0.98514	0.971514
DEA41	1	1	0.993221	1	0.991743	1	0.994129	1	0.992261	1	0.995518	1	0.995558
DEA42	13	0.765892	0.502803	0.787943	0.551832	0.840106	0.661996	0.890078	0.759345	0.962811	0.899174	0.97838	0.970114
DEA43	9	0.84512	0.737838	0.863728	0.753571	0.886858	0.784159	0.930814	0.866249	0.985046	0.962802	0.992037	0.981343
DEA44	10	0.898808	0.633982	0.914182	0.654898	0.916068	0.669447	0.934241	0.762582	0.988271	0.965067	0.992566	0.986955
DEA45	16	0.803115	0.606341	0.837336	0.669828	0.870585	0.739669	0.927256	0.837885	0.987114	0.963305	0.98714	0.979972
DEA46	11	0.862847	0.609571	0.881067	0.647704	0.890201	0.69458	0.929938	0.810143	0.983791	0.967823	0.986692	0.978833
DEA47	10	0.783636	0.479716	0.81024	0.512402	0.856104	0.576419	0.880489	0.623154	0.945145	0.787774	0.972938	0.960531
DEA51	1	1	0.990852	1	0.989682	1	0.99316	1	0.989957	1	0.994905	1	0.99577
DEA52	1	1	0.993627	1	0.99294	1	0.995366	1	0.994965	1	0.998404	1	0.997981
DEA53	1	1	0.987324	1	0.986611	1	0.990001	1	0.988477	1	0.992154	1	0.995831
DEA54	1	1	0.999522	1	0.998238	0.998832	0.998832	1	0.999477	0.997523	0.997523	0.997284	0.997284
DEA55	1	1	0.971318	1	0.968301	1	0.971694	1	0.971768	1	0.976147	1	0.978065
DEA56	9	0.75664	0.659103	0.792	0.723815	0.862685	0.819176	0.929507	0.904748	0.973052	0.949754	0.980971	0.961236
DEA57	12	0.900784	0.654373	0.919461	0.683904	0.931474	0.691549	0.946512	0.738022	0.992683	0.967126	0.993018	0.984286
DEA58	15	0.742403	0.61714	0.779986	0.701586	0.830744	0.781766	0.906777	0.883026	0.953787	0.929554	0.96939	0.955393
DEA59	7	0.901006	0.738558	0.909796	0.750743	0.917921	0.787838	0.952582	0.866644	0.979127	0.941177	0.994062	0.982718
DEA5A	11	0.833081	0.581773	0.871485	0.634642	0.909228	0.728682	0.949052	0.856715	0.971312	0.96251	0.979181	0.969735
DEA5B	14	0.820211	0.623637	0.848929	0.656737	0.888193	0.698668	0.920303	0.755936	0.969741	0.916795	0.984608	0.971072
DEA5C	10	0.828485	0.518202	0.835128	0.540103	0.88637	0.672195	0.923023	0.780593	0.963033	0.932333	0.969804	0.939154
DEB11	1	1	0.993981	1	0.998942	1	0.997686	1	0.999577	0.999843	0.999843	0.999793	0.999793
DEB12	74	0.929831	0.358434	0.931065	0.357631	0.931403	0.436016	0.953899	0.512949	0.976948	0.784144	0.976534	0.925137
DEB13	119	0.849359	0.509893	0.855601	0.527324	0.862888	0.594177	0.883793	0.685491	0.94874	0.831989	0.956524	0.851073
DEB14	119	0.80409	0.569334	0.821617	0.569932	0.860715	0.655919	0.920724	0.727511	0.969245	0.809292	0.978599	0.903198
DEB15	96	0.895872	0.569725	0.903773	0.579669	0.922112	0.63948	0.944072	0.72806	0.965343	0.824305	0.963996	0.881556
DEB16	92	0.857092	0.663457	0.851522	0.625925	0.858927	0.672875	0.894217	0.733431	0.949943	0.848111	0.971218	0.897229
DEB17	87	0.758815	0.375781	0.76785	0.391431	0.810726	0.483365	0.881692	0.573766	0.955557	0.761345	0.97252	0.91038
DEB18	62	0.691228	0.362572	0.732315	0.394813	0.810618	0.506904	0.851391	0.634923	0.953853	0.861713	0.980658	0.929988
DEB19	134	0.842452	0.498483	0.8377	0.501405	0.841668	0.610104	0.882469	0.714661	0.941439	0.846358	0.962117	0.914243
DEB1A	137	0.809817	0.611153	0.812621	0.58629	0.846234	0.658959	0.885325	0.74576	0.952239	0.842263	0.965303	0.889625
DEB1B	192	0.82255	0.352708	0.812992	0.353987	0.84994	0.476306	0.864328	0.611645	0.950508	0.813846	0.970625	0.881344
DEB21	1	1	0.991335	1	0.997075	1	0.995625	1	0.996198	1	0.996791	1	0.996865
DEB22	107	0.883675	0.592082	0.863773	0.5451	0.888407	0.625938	0.909997	0.731576	0.957611	0.84345	0.969039	0.898798
DEB23	235	0.916959	0.647338	0.906491	0.641901	0.894773	0.689891	0.911329	0.753628	0.927559	0.808972	0.924907	0.836099
DEB24	109	0.910237	0.569912	0.89498	0.548626	0.898238	0.617884	0.932462	0.723721	0.956534	0.846591	0.969327	0.912375
DEB25	104	0.85343	0.433814	0.836214	0.419935	0.872504	0.556625	0.898805	0.649208	0.948398	0.789872	0.972789	0.902526
DEB31	1	0.99376	0.99376	0.989389	0.989389	0.990374	0.990374	0.989654	0.989654	0.989866	0.989866	0.989386	0.989386
DEB32	1	1	0.994718	1	0.999126	1	0.997954	1	0.998993	1	0.998928	1	0.992095
DEB33	1	0.996759	0.996759	0.993017	0.993017	0.994256	0.994256	0.994292	0.994292	0.994847	0.994847	0.995549	0.995549
DEB34	1	1	0.982588	1	0.988104	1	0.986675	1	0.988241	1	0.989219	1	0.989255
DEB35	1	1	0.986663	1	0.992142	1	0.992556	1	0.994094	1	0.995182	1	0.995909
DEB36	1	1	0.996836	0.999518	0.999518	0.99998	0.99998	0.999154	0.999154	0.995697	0.995697	0.995724	0.995724
DEB37	1	1	0.997096	0.997581	0.997581	0.999074	0.999074	1	0.997504	1	0.990932	1	0.99428
DEB38	1	1	0.987363	1	0.99175	1	0.991177	1	0.992525	1	0.99335	1	0.993481
DEB39	1	1	0.990338	1	0.995393	1	0.994212	1	0.995386	1	0.996006	1	0.996085
DEB3A	1	1	0.992934	1	0.998826	1	0.997509	1	0.99885	1	0.999692	1	0.999882
DEB3B	69	0.87772	0.312292	0.872516	0.315478	0.843224	0.376296	0.839565	0.544745	0.949302	0.914363	0.979409	0.957862
DEB3C	48	0.818245	0.389625	0.817024	0.412704	0.832582	0.48103	0.861741	0.619053	0.944957	0.854162	0.9668	0.911852
DEB3D	81	0.866811	0.419223	0.844692	0.40502	0.845573	0.518969	0.872258	0.606811	0.951053	0.809373	0.971927	0.914296
DEB3E	31	0.840943	0.239953	0.836246	0.299121	0.856911	0.429575	0.891666	0.521783	0.959232	0.838441	0.987445	0.936113
DEB3F	50	0.844282	0.410831	0.843732	0.419632	0.862443	0.505967	0.903974	0.640098	0.979423	0.899563	0.977642	0.947353
DEB3G	98	0.896627	0.530337	0.889451	0.533293	0.90448	0.604066	0.939395	0.715356	0.968492	0.81822	0.968144	0.89668
DEB3H	75	0.82702	0.542822	0.828498	0.556038	0.840333	0.61609	0.890335	0.761052	0.957705	0.900688	0.976051	0.940666
DEB3I	25	0.84793	0.24633	0.841868	0.276199	0.835679	0.440452	0.884927	0.650228	0.947883	0.888451	0.984831	0.966646
DEB3J	66	0.756211	0.31392	0.736621	0.322666	0.739718	0.455165	0.806626	0.586673	0.922311	0.811757	0.969483	0.931274
DEB3K	84	0.871659	0.522628	0.848743	0.522297	0.866763	0.595665	0.913487	0.721838	0.969179	0.831938	0.971464	0.890418
DEC01	10	0.928747	0.648741	0.945026	0.671621	0.96775	0.732258	0.991147	0.861794	0.992595	0.867542	0.996463	0.925276
DEC02	7	0.817826	0.568538	0.834854	0.621736	0.868872	0.710613	0.924794	0.851263	0.95232	0.922593	0.987926	0.980123
DEC03	7	0.834101	0.656238	0.837141	0.659605	0.86889	0.708784	0.930745	0.838323	0.943685	0.881754	0.97924	0.959467
DEC04	13	0.850148	0.550305	0.857685	0.591624	0.87874	0.656393	0.946699	0.866434	0.955188	0.903283	0.970908	0.949659
DEC05	7	0.811412	0.564033	0.834625	0.640967	0.859753	0.715057	0.921265	0.851925	0.936307	0.885349	0.975716	0.960609
DEC06	8	0.819792	0.521797	0.823797	0.532662	0.853144	0.613887	0.939409	0.864972	0.95777	0.921078	0.990242	0.983154
DED21	1	0.980335	0.980335	0.987753	0.987753	0.988872	0.988872	0.988435	0.988435	0.98438	0.98438	0.992906	0.992906
DED2C	59	0.873142	0.240933	0.915803	0.62018	0.9171	0.696898	0.915478	0.7069	0.939613	0.76643	0.968879	0.89233
DED2D	54	0.873418	0.280412	0.909371	0.643058	0.91544	0.732989	0.923484	0.81431	0.946203	0.786469	0.976507	0.901349
DED2E	31	0.897275	0.390159	0.925679	0.601491	0.924007	0.644399	0.925488	0.61511	0.947089	0.747071	0.967847	0.876515
DED2F	37	0.851133	0.389156	0.915001	0.641874	0.926094	0.642628	0.933134	0.616374	0.971589	0.825914	0.976496	0.896174
DED41	1	0.996356	0.996356	1	0.998867	1	0.998328	1	0.999036	0.996694	0.996694	1	0.998446
DED42	63	0.86341	0.60635	0.93272	0.795376	0.935912	0.824211	0.926492	0.818559	0.956386	0.864503	0.975208	0.923091
DED43	54	0.843046	0.453939	0.926572	0.694965	0.944755	0.717756	0.9174	0.691657	0.953381	0.807905	0.976025	0.902323
DED44	40	0.897763	0.391474	0.932068	0.689209	0.933229	0.720049	0.937815	0.690286	0.94652	0.770573	0.970375	0.877011
DED45	33	0.926304	0.639243	0.954987	0.863646	0.947015	0.871334	0.939157	0.84056	0.967191	0.877369	0.974498	0.910855
DED51	1	0.951569	0.951569	0.965515	0.965515	0.967379	0.967379	0.965367	0.965367	0.985722	0.985722	0.99656	0.99656
DED52	34	0.82361	0.35753	0.839717	0.444338	0.841821	0.459371	0.83656	0.44814	0.97037	0.879879	0.985538	0.936513
DED53	30	0.887701	0.396772	0.944716	0.567837	0.951505	0.590261	0.951524	0.613178	0.978471	0.800124	0.986202	0.899655
DEE01	1	0.992456	0.992456	0.996113	0.996113	0.993706	0.993706	0.996325	0.996325	0.995403	0.995403	1	0.999724
DEE02	1	0.992191	0.992191	0.99638	0.99638	0.994872	0.994872	0.997303	0.997303	0.996994	0.996994	1	0.999468
DEE03	1	1	0.989944	1	0.990685	1	0.994711	1	0.991694	1	0.992398	1	0.988546
DEE04	13	0.933665	0.255655	0.953571	0.477826	0.959489	0.535203	0.961216	0.567023	0.970925	0.695612	0.99641	0.957594
DEE05	10	0.884516	0.555644	0.942163	0.844353	0.945928	0.886885	0.931723	0.866226	0.948838	0.882771	0.983532	0.966262
DEE06	8	0.782648	0.386552	0.839893	0.648114	0.849704	0.678927	0.852008	0.673824	0.919911	0.806944	0.970666	0.950191
DEE07	35	0.861365	0.378681	0.914804	0.610924	0.932116	0.647096	0.926664	0.647338	0.970553	0.851178	0.987168	0.971625
DEE08	33	0.916688	0.386288	0.902225	0.655482	0.897739	0.687754	0.972855	0.690289	0.977151	0.769457	0.991016	0.96493
DEE09	20	0.871181	0.33043	0.924455	0.731168	0.93498	0.792595	0.93279	0.828346	0.958848	0.87692	0.985591	0.969186
DEE0A	22	0.90699	0.654443	0.952231	0.812844	0.951744	0.846459	0.941099	0.860827	0.950633	0.840798	0.980993	0.95862
DEE0B	20	0.901984	0.678569	0.912434	0.755521	0.908524	0.765431	0.915354	0.777546	0.94962	0.852416	0.97917	0.961072
DEE0C	21	0.915706	0.445159	0.935129	0.806296	0.929188	0.823031	0.936674	0.813212	0.954058	0.837431	0.982289	0.953675
DEE0D	25	0.871236	0.27373	0.900528	0.548294	0.944659	0.679592	0.93903	0.728024	0.964297	0.719979	0.989979	0.971274
DEE0E	9	0.857936	0.413808	0.910129	0.70868	0.922769	0.784255	0.930965	0.790961	0.943191	0.839983	0.993315	0.978751
DEF01	1	0.984689	0.984689	0.987869	0.987869	0.989157	0.989157	1	0.999381	0.993891	0.993891	0.994945	0.994945
DEF02	1	1	0.998947	1	0.998221	1	0.999173	1	0.987057	1	0.995336	1	0.995074
DEF03	1	0.989684	0.989684	0.992536	0.992536	0.988034	0.988034	0.998191	0.998191	0.99094	0.99094	0.993286	0.993286
DEF04	1	0.991585	0.991585	0.994867	0.994867	0.995637	0.995637	1	0.995101	0.998062	0.998062	0.998	0.998
DEF05	116	0.905704	0.559254	0.893404	0.593172	0.897881	0.649167	0.905925	0.748367	0.953689	0.866824	0.958019	0.916363
DEF06	133	0.92895	0.333447	0.894782	0.448606	0.87041	0.526394	0.888317	0.663576	0.935416	0.827838	0.959694	0.918243
DEF07	133	0.903476	0.520365	0.900951	0.565254	0.882508	0.645499	0.9109	0.728099	0.955212	0.839904	0.955324	0.894561
DEF08	36	0.923334	0.481556	0.912323	0.533823	0.918774	0.588852	0.934737	0.706335	0.960268	0.848664	0.975736	0.948933
DEF09	49	0.784891	0.41391	0.68009	0.49041	0.7044	0.574889	0.792858	0.711633	0.91102	0.842754	0.949558	0.923148
DEF0A	85	0.85999	0.543443	0.844116	0.577779	0.866429	0.621344	0.876625	0.685293	0.925455	0.835338	0.943851	0.905136
DEF0B	165	0.919668	0.518923	0.895885	0.543577	0.878789	0.59239	0.899864	0.676679	0.952637	0.856114	0.968343	0.927737
DEF0C	134	0.903836	0.542476	0.909004	0.58373	0.901216	0.641014	0.921407	0.72133	0.966902	0.860923	0.975195	0.93422
DEF0D	96	0.860026	0.323017	0.789858	0.497761	0.767357	0.642093	0.827328	0.782079	0.925663	0.894385	0.970349	0.935704
DEF0E	111	0.918841	0.507403	0.918475	0.563343	0.914346	0.607786	0.915949	0.717888	0.940407	0.843031	0.950864	0.905078
DEF0F	55	0.763628	0.440295	0.688891	0.479388	0.744313	0.617257	0.814133	0.739382	0.921983	0.869093	0.976977	0.946559
DEG01	1	0.994668	0.994668	0.991899	0.991899	0.990585	0.990585	0.993533	0.993533	0.999223	0.999223	1	0.999107
DEG02	1	0.992674	0.992674	0.991763	0.991763	0.990386	0.990386	0.994181	0.994181	0.999513	0.999513	1	0.999043
DEG03	1	0.993289	0.993289	0.990518	0.990518	0.989209	0.989209	0.992184	0.992184	0.997932	0.997932	1	0.996043
DEG04	1	0.990858	0.990858	0.988088	0.988088	0.986789	0.986789	0.990307	0.990307	0.996721	0.996721	0.999201	0.999201
DEG05	1	0.994541	0.994541	0.992075	0.992075	0.991592	0.991592	0.994936	0.994936	1	0.999359	1	0.997251
DEG06	80	0.648877	0.27641	0.800699	0.480328	0.864918	0.611291	0.902184	0.689242	0.973967	0.782548	0.988419	0.926545
DEG07	27	0.913324	0.311109	0.954884	0.620303	0.931979	0.746599	0.947527	0.778738	0.972471	0.848153	0.969573	0.933041
DEG09	42	0.816551	0.403144	0.915055	0.693224	0.921366	0.728654	0.965407	0.753385	0.986957	0.850649	0.983208	0.967128
DEG0A	43	0.963745	0.410354	0.981768	0.645295	0.985379	0.722623	0.988327	0.835203	0.988113	0.852946	0.989518	0.957032
DEG0B	62	0.856494	0.406723	0.915168	0.664965	0.958326	0.749387	0.958729	0.770641	0.983313	0.857453	0.988486	0.961701
DEG0C	48	0.807716	0.318769	0.921124	0.605026	0.919278	0.709441	0.911384	0.669987	0.977219	0.874885	0.985973	0.972105
DEG0D	54	0.732224	0.379193	0.895849	0.675712	0.911845	0.765841	0.915784	0.799843	0.984894	0.889792	0.981069	0.951724
DEG0E	38	0.911185	0.51252	0.974842	0.659992	0.969735	0.69649	0.978965	0.740633	0.981549	0.814174	0.984656	0.961406
DEG0F	43	0.646583	0.303503	0.873419	0.67016	0.901422	0.756099	0.887801	0.754887	0.960267	0.832749	0.985712	0.954832
DEG0G	70	0.789437	0.397596	0.854638	0.589396	0.872568	0.649538	0.896874	0.681599	0.961868	0.808166	0.971857	0.923386
DEG0H	12	0.740349	0.371902	0.865374	0.673489	0.889546	0.776653	0.971613	0.773203	0.992069	0.90222	0.993052	0.953315
DEG0I	38	0.802096	0.233557	0.948386	0.596388	0.950526	0.64014	0.95646	0.71711	0.960632	0.794007	0.973004	0.924943
DEG0J	93	0.755107	0.322183	0.842695	0.501801	0.85269	0.537419	0.858524	0.573791	0.944401	0.715893	0.965961	0.888869
DEG0K	73	0.899477	0.555418	0.948843	0.647805	0.951164	0.676832	0.961804	0.740329	0.97795	0.859236	0.97855	0.936645
DEG0L	53	0.878114	0.456029	0.914542	0.617922	0.913547	0.68763	0.921655	0.748686	0.977143	0.806635	0.96966	0.934842
DEG0M	38	0.941935	0.268787	0.974271	0.481173	0.969715	0.665685	0.966048	0.753429	0.982302	0.814102	0.98017	0.938277
DEG0N	1	0.995796	0.995796	0.993039	0.993039	0.991749	0.991749	0.994408	0.994408	0.999595	0.999595	1	0.999322
DEG0P	58	0.716384	0.368451	0.796981	0.628177	0.808965	0.672158	0.879135	0.756343	0.943324	0.817664	0.986462	0.932705
DK011	4	0.876908	0.788823	0.931178	0.705742	0.949233	0.67568	0.979141	0.812007	0.983318	0.882102	0.991805	0.980663
DK012	13	0.817616	0.575875	0.858507	0.632708	0.896698	0.765365	0.944353	0.889126	0.963731	0.929517	0.990531	0.981265
DK013	11	0.754922	0.481819	0.773929	0.512226	0.865152	0.697766	0.8965	0.770927	0.951517	0.893988	0.984431	0.964731
DK014	2	0.5	0.491531	0.5	0.493856	0.5	0.493414	0.5	0.493517	0.5	0.492538	0.5	0.492668
DK021	5	0.90462	0.602406	0.870524	0.620335	0.892504	0.767709	0.913639	0.821644	0.965119	0.93366	0.996037	0.99331
DK022	12	0.91686	0.787058	0.931137	0.799753	0.940533	0.817169	0.954062	0.858755	0.970627	0.906193	0.999934	0.989698
DK031	10	0.917403	0.650571	0.93878	0.65372	0.964569	0.678485	0.963469	0.777982	0.981664	0.883626	0.999955	0.993127
DK032	12	0.931093	0.770323	0.926845	0.736633	0.923481	0.796014	0.957406	0.8687	0.979957	0.935744	0.996962	0.985767
DK041	8	0.934328	0.863505	0.94441	0.884048	0.958642	0.900549	0.97586	0.930262	0.983101	0.946125	0.990843	0.987851
DK042	11	0.881733	0.737152	0.882695	0.747992	0.937451	0.794811	0.960794	0.808769	0.967222	0.851696	0.997468	0.985463
DK050	11	0.935425	0.757927	0.949753	0.756073	0.959512	0.756826	0.970082	0.830996	0.985904	0.91488	0.996644	0.987161
EE001	24	0.928765	0.235858	0.825948	0.306602	0.743674	0.347939	0.719134	0.5794	0.857891	0.614802	0.956865	0.818855
EE004	53	0.895547	0.512634	0.903377	0.617702	0.913337	0.685038	0.929748	0.726752	0.957428	0.798028	0.980236	0.947688
EE006	37	0.924456	0.697735	0.929216	0.747535	0.928182	0.773318	0.923205	0.792657	0.958389	0.868733	0.985409	0.979986
EE007	25	0.954181	0.373445	0.949478	0.633396	0.912806	0.72853	0.839074	0.704092	0.928695	0.764651	0.967789	0.847954
EE008	91	0.933658	0.540144	0.939396	0.619696	0.942224	0.681825	0.940029	0.727424	0.955354	0.783831	0.982159	0.957313
EL111	5	0.899621	0.455813	0.913155	0.502754	0.936825	0.576521	0.942387	0.596365	0.976719	0.687995	1	0.912262
EL112	4	0.898516	0.474598	0.902353	0.515373	0.916877	0.537806	0.91753	0.541471	0.938371	0.64237	0.981114	0.979355
EL113	4	0.907117	0.523565	0.897466	0.462304	0.915639	0.527935	0.925257	0.575594	0.959433	0.659718	0.986801	0.985102
EL114	5	0.89224	0.436295	0.930276	0.51551	0.948387	0.588169	0.953895	0.608801	0.982749	0.68195	0.999712	0.979559
EL115	4	0.914921	0.59683	0.901029	0.591698	0.932441	0.690976	0.934296	0.713651	0.989663	0.824835	0.99321	0.961926
EL121	3	0.935483	0.793185	0.92076	0.759657	0.935675	0.790722	0.945418	0.818981	0.974214	0.861373	0.991308	0.981057
EL122	14	0.882823	0.41933	0.890427	0.455319	0.890277	0.528998	0.865901	0.513819	0.888128	0.600603	0.976363	0.941312
EL123	2	0.983057	0.953378	0.991028	0.964478	0.992503	0.957286	1	0.925307	1	0.879885	0.99371	0.993101
EL124	4	0.967335	0.892637	0.937136	0.836059	0.964192	0.883302	0.975745	0.923629	0.996848	0.941401	0.984071	0.98392
EL125	3	0.917422	0.551941	0.913948	0.520802	0.932387	0.58226	0.94884	0.616005	0.993251	0.701599	0.999987	0.990691
EL126	7	0.936891	0.628015	0.921643	0.620207	0.927543	0.666904	0.948311	0.697882	0.984844	0.755554	0.961066	0.939606
EL127	6	0.874816	0.367367	0.877056	0.414587	0.896871	0.476198	0.913355	0.490692	0.960194	0.69459	1	0.904371
EL131	2	0.971035	0.759148	0.961455	0.744497	0.998118	0.945173	1	0.892935	1	0.828893	0.802525	0.745223
EL132	3	0.952835	0.680502	0.950324	0.712019	0.971114	0.768495	0.974144	0.765216	1	0.772476	0.996906	0.941506
EL133	4	0.858581	0.518056	0.877191	0.560078	0.907166	0.613309	0.917248	0.637415	0.944456	0.723166	0.991537	0.986006
EL134	3	0.928413	0.555341	0.927443	0.584717	0.940199	0.709725	0.940157	0.661601	0.974397	0.651223	0.995261	0.983937
EL141	6	0.940572	0.615585	0.94816	0.68092	0.961211	0.779614	0.966866	0.773253	0.97983	0.741978	0.984616	0.836152
EL142	7	0.891577	0.492185	0.906409	0.493142	0.930164	0.53332	0.94261	0.546489	0.941601	0.636453	0.968063	0.962037
EL143	8	0.967946	0.382925	0.973868	0.390437	0.977455	0.387374	0.97759	0.394885	0.986602	0.496545	0.989018	0.867659
EL144	4	0.910524	0.537585	0.921616	0.549898	0.932974	0.585432	0.942349	0.649223	0.964094	0.677656	0.997615	0.981432
EL211	4	0.916194	0.543066	0.938841	0.644843	0.93793	0.666806	0.956701	0.689307	0.967189	0.693208	0.987396	0.945302
EL212	3	0.848745	0.469765	0.865135	0.484605	0.889679	0.553323	0.922287	0.613389	0.982175	0.747415	1	0.965697
EL213	8	0.935516	0.378268	0.952955	0.477448	0.95537	0.467645	0.968125	0.511488	0.974706	0.579739	0.914288	0.837823
EL214	3	0.87441	0.543606	0.879881	0.573805	0.894488	0.613263	0.913735	0.64969	0.932967	0.715537	0.983748	0.95765
EL221	1	1	0.870202	1	0.87967	1	0.875126	1	0.881899	1	0.912623	1	0.856725
EL222	2	1	0.668132	1	0.692881	1	0.753964	1	0.726349	1	0.778103	1	0.917415
EL223	2	0.962215	0.517272	0.958297	0.509652	0.96495	0.527469	0.9721	0.540075	1	0.58823	1	0.951952
EL224	2	1	0.738568	1	0.748281	1	0.824984	1	0.812081	0.999324	0.885771	0.972622	0.931712
EL231	7	0.872279	0.513605	0.85892	0.509162	0.864275	0.532707	0.882946	0.593137	0.895465	0.652762	0.904007	0.803588
EL232	5	0.954086	0.645726	0.963772	0.696524	0.967501	0.724587	0.982542	0.747372	0.986185	0.731763	0.983526	0.968626
EL233	7	0.876239	0.578421	0.887053	0.6241	0.901442	0.649445	0.935229	0.749342	0.978694	0.734543	0.998709	0.968813
EL241	6	0.936018	0.624139	0.900301	0.564456	0.914262	0.650203	0.975195	0.764285	0.991684	0.782038	0.994077	0.972528
EL242	8	0.914836	0.513322	0.937017	0.515403	0.950496	0.498702	0.953072	0.532066	0.96558	0.684952	0.993771	0.946785
EL243	2	0.86199	0.65355	0.842591	0.602641	0.903372	0.723723	1	0.799791	1	0.587908	1	0.702859
EL244	7	0.931457	0.487354	0.943198	0.583541	0.954533	0.690556	0.966943	0.724357	0.980467	0.731159	0.993531	0.966626
EL245	2	0.909594	0.692796	0.936307	0.757258	0.976319	0.86824	1	0.748881	1	0.768768	1	0.897026
EL251	4	0.931917	0.631004	0.931727	0.634121	0.928835	0.61044	0.941618	0.637592	0.982464	0.723649	0.998275	0.954526
EL252	5	0.734228	0.451286	0.718227	0.436551	0.711204	0.436354	0.738107	0.47021	0.767378	0.537785	0.699493	0.564796
EL253	6	0.88902	0.712101	0.893653	0.7095	0.91874	0.729297	0.947186	0.723662	0.965798	0.790009	0.982066	0.966442
EL254	5	0.948824	0.80726	0.955129	0.779183	0.967136	0.810184	0.974169	0.757188	0.994097	0.769972	0.993081	0.964536
EL255	6	0.928867	0.644469	0.935266	0.66689	0.948447	0.704404	0.954651	0.688424	0.976889	0.754654	0.998696	0.945622
EL300	66	0.884093	0.280271	0.867471	0.415018	0.859877	0.47243	0.856458	0.484935	0.885155	0.607901	0.943718	0.905711
EL411	3	0.926826	0.614502	0.939857	0.716241	0.940702	0.747691	0.989693	0.858106	1	0.783069	1	0.953733
EL412	3	1	0.708505	1	0.667877	1	0.659918	1	0.718592	1	0.654597	0.97413	0.916505
EL413	3	1	0.490393	1	0.512273	1	0.562077	1	0.591685	1	0.470679	0.976957	0.965189
EL421	15	0.93347	0.33894	0.941629	0.419542	0.920382	0.488563	0.9118	0.494151	0.921443	0.550406	0.979029	0.863577
EL422	19	0.937536	0.296613	0.937842	0.300513	0.941126	0.327903	0.944089	0.319202	0.942281	0.560194	0.997293	0.933465
EL431	8	0.94258	0.528533	0.939833	0.578748	0.971286	0.606192	0.971358	0.603318	0.982445	0.683687	1	0.885451
EL432	4	0.966694	0.717802	0.958335	0.712273	0.95745	0.709343	0.980244	0.760072	1	0.791071	0.996858	0.936792
EL433	5	0.915723	0.368417	0.920395	0.425749	0.932144	0.46705	0.948281	0.524419	0.96635	0.568831	0.998471	0.80891
EL434	7	0.804386	0.342637	0.816646	0.446186	0.825726	0.488669	0.833917	0.519506	0.84134	0.54437	1	0.858303
ES111	94	0.900641	0.555326	0.904541	0.575417	0.923733	0.62122	0.936604	0.67111	0.95563	0.709584	0.987213	0.939313
ES112	67	0.919308	0.537679	0.929576	0.560181	0.950563	0.591756	0.960458	0.684492	0.979052	0.778292	0.993322	0.968413
ES113	92	0.936545	0.514047	0.937759	0.552258	0.941678	0.592126	0.964698	0.652566	0.979005	0.815061	0.990431	0.958497
ES114	62	0.893394	0.588391	0.898999	0.600806	0.916323	0.637465	0.925688	0.661941	0.945778	0.707184	0.990463	0.946524
ES120	78	0.958613	0.467655	0.971126	0.500176	0.972341	0.53448	0.973146	0.557452	0.982432	0.667643	0.992433	0.940762
ES130	103	0.900558	0.402016	0.898114	0.423262	0.912886	0.473293	0.913372	0.523918	0.932419	0.605147	0.978757	0.915499
ES211	54	0.967847	0.253679	0.9721	0.316399	0.964672	0.380776	0.976158	0.423582	0.986501	0.477279	0.974144	0.913599
ES212	90	0.788735	0.389295	0.849086	0.453973	0.872321	0.513758	0.873118	0.541925	0.912948	0.675183	0.959974	0.872676
ES213	112	0.880789	0.321521	0.869681	0.346505	0.865259	0.426819	0.896329	0.467326	0.903562	0.55721	0.950611	0.87717
ES220	289	0.913607	0.299266	0.913953	0.361275	0.901605	0.410078	0.911031	0.456793	0.927552	0.543548	0.971139	0.924829
ES230	175	0.910726	0.22167	0.922182	0.313409	0.92717	0.420472	0.95287	0.472717	0.95981	0.555785	0.982837	0.927622
ES241	203	0.904614	0.317618	0.90539	0.386838	0.916246	0.494371	0.91649	0.545085	0.951313	0.721815	0.986481	0.96442
ES242	238	0.921244	0.342815	0.917512	0.404473	0.902408	0.483137	0.886809	0.552335	0.956986	0.793598	0.991655	0.973779
ES243	293	0.86232	0.173155	0.892016	0.227288	0.895944	0.276863	0.924381	0.31606	0.962024	0.47851	0.984506	0.883273
ES300	181	0.757501	0.107893	0.754007	0.0988136	0.785409	0.108291	0.856199	0.12849	0.909999	0.173824	0.972194	0.661624
ES411	248	0.973506	0.390515	0.973835	0.424546	0.969993	0.491652	0.969594	0.564116	0.975224	0.714636	0.988731	0.95877
ES412	413	0.956718	0.268158	0.947628	0.34451	0.938419	0.501769	0.915881	0.603747	0.939888	0.721026	0.984521	0.937361
ES413	215	0.967272	0.408834	0.968419	0.469899	0.976424	0.514969	0.981679	0.562341	0.976771	0.707389	0.990939	0.951111
ES414	191	0.966083	0.37515	0.967274	0.438948	0.982039	0.524714	0.97628	0.583131	0.975456	0.724952	0.990158	0.931483
ES415	363	0.94867	0.376258	0.949933	0.415471	0.948867	0.467754	0.95	0.507507	0.95401	0.642585	0.98732	0.947067
ES416	210	0.926045	0.270383	0.926843	0.315156	0.913118	0.402967	0.913948	0.468536	0.913523	0.630952	0.976858	0.951817
ES417	184	0.959065	0.352537	0.969201	0.448989	0.96657	0.519316	0.949708	0.630808	0.97471	0.766166	0.994546	0.96885
ES418	225	0.945686	0.190738	0.958175	0.283502	0.965767	0.370504	0.952322	0.431303	0.954066	0.507005	0.986882	0.896167
ES419	248	0.960596	0.422109	0.972487	0.469922	0.973854	0.519892	0.977446	0.619076	0.982227	0.782592	0.994419	0.97286
ES421	88	0.960167	0.250268	0.963321	0.279888	0.967514	0.345482	0.966371	0.403009	0.975085	0.488685	0.989797	0.943028
ES422	102	0.92792	0.275043	0.934963	0.288842	0.933065	0.304792	0.938865	0.338843	0.956129	0.385772	0.985665	0.908278
ES423	238	0.95805	0.322193	0.965684	0.408911	0.957811	0.492002	0.949128	0.537397	0.970376	0.727676	0.99417	0.972999
ES424	289	0.839074	0.166638	0.841419	0.202645	0.898476	0.338904	0.909124	0.397708	0.948107	0.496586	0.983759	0.944963
ES425	204	0.873794	0.212564	0.882703	0.222837	0.899649	0.252919	0.90857	0.274309	0.895713	0.355035	0.969334	0.912627
ES431	164	0.9254	0.303779	0.939322	0.289636	0.932886	0.303383	0.936512	0.396519	0.946796	0.579196	0.987356	0.947701
ES432	221	0.941697	0.311963	0.962857	0.382746	0.961845	0.462168	0.948763	0.515477	0.96963	0.73387	0.991138	0.962154
ES511	311	0.896911	0.170794	0.888112	0.171714	0.843166	0.224655	0.858455	0.2522	0.888247	0.369303	0.96198	0.857783
ES512	221	0.885165	0.321109	0.904252	0.354412	0.911755	0.413668	0.926689	0.44622	0.93141	0.504904	0.965816	0.899804
ES513	233	0.911014	0.266141	0.917413	0.338125	0.941875	0.428425	0.936468	0.484218	0.950889	0.594496	0.978461	0.940122
ES514	184	0.904697	0.338825	0.911096	0.383262	0.919104	0.446091	0.920285	0.496041	0.931373	0.556167	0.969778	0.934194
ES521	141	0.929039	0.201008	0.925525	0.216393	0.932876	0.267748	0.894351	0.349364	0.875797	0.476625	0.96275	0.929279
ES522	135	0.903208	0.283473	0.917202	0.33462	0.918609	0.400741	0.933032	0.485827	0.946529	0.581054	0.981132	0.941662
ES523	266	0.914157	0.167895	0.896834	0.192855	0.905535	0.233369	0.892918	0.272316	0.894712	0.396988	0.941631	0.813699
ES531	6	0.809154	0.398245	0.828366	0.442971	0.895313	0.521866	0.906224	0.538255	0.907844	0.560951	0.982716	0.908716
ES532	53	0.967922	0.221207	0.966413	0.204155	0.956792	0.196343	0.935001	0.22466	0.902056	0.395523	0.969272	0.945342
ES533	8	0.739592	0.465222	0.741361	0.459362	0.751398	0.464313	0.890821	0.481487	0.914277	0.566396	0.979273	0.945057
ES611	102	0.881091	0.335153	0.88784	0.409174	0.874472	0.472539	0.894435	0.549031	0.924979	0.646616	0.973788	0.913686
ES612	44	0.806572	0.513533	0.80868	0.544288	0.830264	0.581146	0.869876	0.631005	0.909461	0.687807	0.98414	0.917952
ES613	75	0.91777	0.343453	0.898376	0.322282	0.871209	0.35983	0.897845	0.43362	0.92913	0.532954	0.985848	0.899234
ES614	168	0.926147	0.332351	0.929777	0.375052	0.920356	0.425918	0.908818	0.487846	0.925257	0.592451	0.977869	0.930009
ES615	79	0.841465	0.289466	0.844825	0.304526	0.862832	0.344213	0.897833	0.402178	0.923557	0.468778	0.977451	0.925793
ES616	98	0.913403	0.349935	0.919854	0.371312	0.918398	0.382086	0.925475	0.401474	0.945198	0.593763	0.986704	0.945465
ES617	101	0.935851	0.289303	0.967228	0.340488	0.944325	0.374565	0.924785	0.426597	0.921298	0.477153	0.974115	0.916368
ES618	105	0.85032	0.114798	0.85912	0.117925	0.8725	0.129317	0.831743	0.192471	0.860799	0.311103	0.97285	0.850092
ES620	45	0.939814	0.273683	0.914731	0.253646	0.811063	0.353366	0.782756	0.442164	0.818206	0.542539	0.972762	0.947616
FI193	23	0.941843	0.463911	0.950101	0.482133	0.960779	0.542451	0.970969	0.594185	0.974624	0.716183	0.998304	0.966818
FI194	18	0.943265	0.532388	0.950115	0.588947	0.957646	0.676139	0.974241	0.776011	0.982834	0.847809	0.998911	0.980909
FI195	15	0.866091	0.452125	0.87711	0.50359	0.850011	0.564935	0.945711	0.673035	0.964338	0.790582	0.999391	0.961989
FI196	20	0.930221	0.422632	0.929536	0.471182	0.960773	0.677993	0.982848	0.772094	0.994208	0.886261	0.9969	0.97974
FI197	22	0.941506	0.323447	0.943242	0.377009	0.92112	0.418392	0.942675	0.533187	0.937596	0.626175	0.992722	0.941124
FI1B1	26	0.977949	0.165321	0.973812	0.194875	0.963898	0.314942	0.953952	0.393569	0.954603	0.581606	0.993248	0.907952
FI1C1	28	0.929852	0.476588	0.941969	0.53132	0.960605	0.585007	0.967555	0.634353	0.970468	0.765344	0.996089	0.970504
FI1C2	11	0.907324	0.518021	0.93168	0.588664	0.961704	0.685692	0.977421	0.806866	0.973177	0.876028	1	0.989766
FI1C3	11	0.899894	0.449976	0.926883	0.477867	0.950959	0.54201	0.970533	0.62816	0.973246	0.676294	1	0.971301
FI1C4	7	0.961481	0.581053	0.968587	0.616396	0.974441	0.675307	0.984036	0.796003	0.992075	0.888471	1	0.972447
FI1C5	9	0.947644	0.53339	0.95952	0.574622	0.97581	0.630039	0.978031	0.656596	0.97837	0.825089	0.991601	0.972098
FI1D1	14	0.950864	0.536825	0.967172	0.634866	0.972832	0.713703	0.974696	0.803665	0.977314	0.898655	0.975975	0.954427
FI1D2	20	0.916178	0.407753	0.934601	0.501179	0.958796	0.576347	0.974985	0.683713	0.987258	0.803959	0.999417	0.98113
FI1D3	13	0.933241	0.515544	0.945862	0.578493	0.933172	0.605382	0.94492	0.678363	0.967939	0.824542	0.999229	0.980307
FI1D4	9	0.937333	0.49138	0.949265	0.57517	0.949386	0.675012	0.970927	0.787789	0.986309	0.875465	0.998959	0.978129
FI1D5	8	0.960047	0.435671	0.970971	0.50887	0.973076	0.529804	0.975378	0.590111	0.986429	0.746698	1	0.979514
FI1D6	29	0.917175	0.379925	0.930096	0.452988	0.949357	0.503583	0.958089	0.561382	0.947308	0.660327	0.996966	0.976451
FI1D7	21	0.946027	0.488287	0.95185	0.496333	0.950714	0.549639	0.973456	0.728393	0.989564	0.854536	0.999782	0.965851
FI200	16	0.868745	0.305336	0.87185	0.370367	0.889182	0.443023	0.894098	0.524046	0.977799	0.612452	1	0.871842
FR101	1	0.989116	0.989116	0.973791	0.973791	0.977801	0.977801	0.977973	0.977973	0.979774	0.979774	0.982551	0.982551
FR102	514	0.885819	0.24649	0.854807	0.259883	0.858732	0.325968	0.882416	0.463648	0.92125	0.655496	0.973243	0.935829
FR103	262	0.603177	0.226236	0.619795	0.356077	0.718763	0.581002	0.82881	0.730286	0.900543	0.854622	0.968194	0.926096
FR104	196	0.46258	0.28278	0.459479	0.379283	0.632997	0.568	0.785569	0.734735	0.886977	0.846088	0.969567	0.929206
FR105	36	0.828514	0.555445	0.888415	0.626827	0.907044	0.685209	0.924724	0.724885	0.945851	0.784618	0.966384	0.905837
FR106	40	0.673059	0.415567	0.830059	0.612181	0.893379	0.724425	0.902779	0.753342	0.920346	0.814828	0.96429	0.885738
FR107	47	0.835572	0.340384	0.849814	0.439658	0.868542	0.527363	0.909729	0.591778	0.939138	0.697482	0.959683	0.896113
FR108	185	0.616059	0.375695	0.65244	0.46352	0.728056	0.609294	0.832096	0.751545	0.913785	0.848775	0.968291	0.914399
FR211	463	0.875506	0.46981	0.845732	0.516913	0.860722	0.592217	0.889334	0.667146	0.917184	0.772928	0.974132	0.927351
FR212	433	0.922229	0.381407	0.875135	0.419848	0.864211	0.529845	0.896008	0.630257	0.915748	0.763937	0.981136	0.942895
FR213	620	0.893296	0.349798	0.881035	0.369517	0.87878	0.461001	0.89013	0.616968	0.914983	0.760505	0.979683	0.949081
FR214	438	0.894943	0.566399	0.887711	0.652323	0.913999	0.750912	0.917761	0.810888	0.932422	0.862941	0.973947	0.936739
FR221	816	0.86229	0.459101	0.840935	0.505162	0.859893	0.611429	0.896086	0.693219	0.924898	0.789713	0.967994	0.92451
FR222	693	0.877524	0.308014	0.858203	0.341241	0.848483	0.427204	0.878187	0.58196	0.914805	0.740092	0.973153	0.93704
FR223	782	0.896927	0.411228	0.873491	0.461413	0.865266	0.559533	0.88407	0.648041	0.904922	0.765741	0.970911	0.925525
FR231	675	0.806283	0.404309	0.809508	0.429253	0.838423	0.515402	0.862014	0.641517	0.895294	0.760525	0.965406	0.910127
FR232	744	0.795358	0.382227	0.763599	0.47592	0.800673	0.609029	0.852008	0.715236	0.897385	0.802943	0.962974	0.913253
FR241	290	0.924554	0.583538	0.893866	0.630301	0.876415	0.712757	0.905007	0.821889	0.927501	0.885192	0.972899	0.946337
FR242	402	0.911648	0.415004	0.886738	0.434767	0.855839	0.509782	0.876964	0.673497	0.913842	0.797224	0.978149	0.942319
FR243	247	0.940084	0.621181	0.919972	0.683356	0.924518	0.772818	0.933171	0.842122	0.941809	0.888171	0.979688	0.954919
FR244	277	0.951455	0.418089	0.939851	0.442121	0.920637	0.456721	0.923853	0.530639	0.927048	0.694306	0.982099	0.956624
FR245	291	0.91994	0.515595	0.872768	0.534721	0.866592	0.629024	0.884665	0.722654	0.912779	0.829276	0.975377	0.942195
FR246	334	0.906786	0.400382	0.89888	0.43223	0.897204	0.48828	0.912175	0.584445	0.918934	0.762022	0.979315	0.949268
FR251	706	0.904482	0.449235	0.893663	0.456937	0.888071	0.523944	0.894563	0.620431	0.91012	0.742754	0.958662	0.898069
FR252	601	0.895754	0.560368	0.872184	0.577903	0.863291	0.636204	0.88403	0.725204	0.9139	0.805136	0.965861	0.917904
FR253	505	0.905157	0.608713	0.882998	0.665632	0.883093	0.737743	0.903094	0.788818	0.926007	0.845296	0.96185	0.916477
FR261	706	0.88248	0.379057	0.876067	0.394232	0.873637	0.459549	0.894853	0.569808	0.91536	0.734884	0.97736	0.944744
FR262	312	0.947562	0.63261	0.937548	0.687488	0.935994	0.790361	0.941418	0.851699	0.949126	0.89688	0.976362	0.951965
FR263	573	0.909592	0.555631	0.875214	0.592259	0.87292	0.675126	0.895646	0.750853	0.925382	0.827863	0.979069	0.94903
FR264	455	0.891357	0.459371	0.861399	0.482676	0.853927	0.560398	0.882753	0.675239	0.920606	0.820202	0.97912	0.950894
FR301	650	0.854197	0.395094	0.847975	0.460557	0.856536	0.57374	0.887691	0.686618	0.917623	0.864628	0.974614	0.923816
FR302	895	0.841129	0.485423	0.806589	0.593924	0.823548	0.698625	0.867101	0.774508	0.905968	0.837891	0.971803	0.920204
FR411	594	0.840347	0.365963	0.839672	0.396955	0.862083	0.482296	0.897249	0.573402	0.916855	0.698422	0.973824	0.929407
FR412	500	0.908659	0.610604	0.889114	0.657724	0.882533	0.717908	0.89625	0.763232	0.92237	0.834576	0.976781	0.943067
FR413	730	0.821645	0.341887	0.821216	0.38451	0.853911	0.480686	0.882497	0.586513	0.911727	0.711014	0.972079	0.928304
FR414	514	0.892494	0.588154	0.877056	0.631526	0.880657	0.707624	0.902936	0.765921	0.925765	0.830379	0.969819	0.929172
FR421	527	0.841579	0.18315	0.814015	0.221854	0.843698	0.300208	0.867734	0.436926	0.918374	0.650324	0.97911	0.938631
FR422	377	0.70348	0.302661	0.690213	0.357103	0.73689	0.484475	0.823569	0.585593	0.894499	0.739594	0.97483	0.92717
FR431	594	0.843551	0.320432	0.849051	0.341084	0.870596	0.418946	0.892605	0.536422	0.906885	0.693014	0.969908	0.919044
FR432	544	0.853963	0.475887	0.820245	0.50101	0.836207	0.596173	0.883814	0.705047	0.919957	0.794248	0.969913	0.919237
FR433	545	0.853481	0.492061	0.850647	0.519443	0.868214	0.601402	0.891667	0.665587	0.911611	0.759157	0.973997	0.929651
FR434	102	0.90083	0.306193	0.917913	0.346491	0.902184	0.439001	0.911258	0.535967	0.908592	0.703263	0.969677	0.887704
FR511	221	0.927601	0.455671	0.910741	0.447071	0.901328	0.456234	0.85538	0.502397	0.879721	0.653961	0.993656	0.96649
FR512	357	0.928478	0.468509	0.911062	0.477458	0.892815	0.525677	0.89228	0.618598	0.90463	0.762285	0.985114	0.958366
FR513	261	0.917226	0.524014	0.90792	0.565818	0.876423	0.613921	0.870939	0.673278	0.908877	0.79392	0.984132	0.957365
FR514	375	0.906518	0.457826	0.90086	0.491467	0.875288	0.550135	0.879855	0.627006	0.907934	0.778468	0.982287	0.946297
FR515	282	0.932415	0.406071	0.905539	0.418008	0.870359	0.46234	0.869515	0.537679	0.883754	0.685932	0.987733	0.958747
FR521	373	0.918409	0.553722	0.904553	0.576744	0.889715	0.625543	0.90215	0.691199	0.927234	0.795235	0.983168	0.954679
FR522	283	0.894956	0.483853	0.880882	0.502501	0.884362	0.553308	0.892427	0.640526	0.911477	0.765693	0.981804	0.951499
FR523	353	0.913551	0.469183	0.898773	0.464296	0.859755	0.455993	0.82819	0.506028	0.878043	0.745958	0.990877	0.957556
FR524	261	0.930844	0.510993	0.934521	0.54088	0.926399	0.554085	0.907134	0.612774	0.918402	0.737925	0.992959	0.959524
FR531	404	0.928504	0.583601	0.917439	0.620821	0.916018	0.690752	0.932816	0.779284	0.938905	0.836265	0.973597	0.941647
FR532	472	0.91383	0.46161	0.90455	0.469728	0.899423	0.508663	0.902668	0.58246	0.906899	0.70514	0.976461	0.935495
FR533	303	0.921204	0.504093	0.900474	0.526187	0.890997	0.591092	0.902432	0.669877	0.919128	0.748849	0.975911	0.947482
FR534	281	0.940321	0.50483	0.934085	0.5401	0.929846	0.57956	0.926452	0.643082	0.931389	0.77739	0.978264	0.947619
FR611	557	0.891178	0.609582	0.866982	0.622722	0.869062	0.678649	0.900432	0.763869	0.925819	0.833969	0.973894	0.937
FR612	542	0.915068	0.447956	0.910586	0.463658	0.912198	0.507149	0.909032	0.599314	0.918507	0.71193	0.97553	0.934817
FR613	331	0.86732	0.480423	0.861866	0.481509	0.869214	0.514452	0.883179	0.588196	0.901002	0.719207	0.985697	0.953076
FR614	319	0.905688	0.55006	0.895619	0.583555	0.894395	0.639009	0.908591	0.714775	0.925966	0.805676	0.976158	0.935834
FR615	547	0.880861	0.470508	0.878386	0.493167	0.898914	0.552568	0.916605	0.638502	0.932144	0.72722	0.966927	0.920206
FR621	332	0.849393	0.488916	0.817356	0.508312	0.841904	0.570366	0.876989	0.655986	0.916626	0.746431	0.954777	0.885097
FR622	304	0.933217	0.590121	0.924347	0.647891	0.923678	0.704346	0.920922	0.763531	0.938013	0.855202	0.978969	0.953191
FR623	589	0.83187	0.327147	0.83963	0.31833	0.888081	0.347063	0.908786	0.42462	0.934053	0.579184	0.971142	0.918135
FR624	463	0.906458	0.618064	0.881954	0.654632	0.874321	0.697354	0.887521	0.74772	0.910357	0.80821	0.970572	0.925863
FR625	340	0.877243	0.543489	0.857978	0.560724	0.875726	0.633273	0.887069	0.703565	0.918396	0.801469	0.975618	0.936576
FR626	474	0.850864	0.481342	0.8469	0.504469	0.848852	0.571474	0.87424	0.668878	0.906686	0.748384	0.947217	0.863623
FR627	323	0.852346	0.45327	0.848801	0.472333	0.872041	0.518891	0.891277	0.59611	0.918982	0.695179	0.971802	0.924546
FR628	195	0.91171	0.450385	0.905217	0.466744	0.887206	0.495227	0.900405	0.572286	0.90994	0.666043	0.979295	0.935574
FR631	286	0.93448	0.608879	0.921869	0.662918	0.90873	0.732079	0.923054	0.789684	0.937874	0.843793	0.975502	0.94722
FR632	260	0.933022	0.618671	0.941198	0.6896	0.944523	0.78295	0.958039	0.866761	0.963508	0.91637	0.975103	0.947228
FR633	201	0.919028	0.540136	0.919016	0.586324	0.925619	0.643733	0.928343	0.688437	0.931427	0.788369	0.980442	0.957272
FR711	419	0.831043	0.351619	0.811261	0.358093	0.812334	0.422786	0.843673	0.559856	0.898855	0.714918	0.981716	0.943089
FR712	339	0.80274	0.419298	0.802967	0.443658	0.821973	0.484598	0.841465	0.564092	0.890462	0.69309	0.976602	0.938537
FR713	369	0.654252	0.328071	0.666444	0.349774	0.703245	0.399715	0.770833	0.484519	0.842779	0.615076	0.97229	0.93044
FR714	533	0.889361	0.352503	0.854059	0.366475	0.853522	0.441975	0.873245	0.549483	0.904879	0.710858	0.976881	0.940476
FR715	327	0.800317	0.409791	0.759801	0.421192	0.787547	0.504746	0.834985	0.60587	0.895129	0.746399	0.9758	0.937978
FR716	288	0.967584	0.312595	0.957364	0.310245	0.960336	0.35336	0.942434	0.454054	0.940914	0.633158	0.973493	0.941493
FR717	305	0.848563	0.383161	0.840051	0.398157	0.850644	0.454108	0.870231	0.544689	0.902907	0.71106	0.974	0.912356
FR718	295	0.816731	0.324669	0.748332	0.334644	0.759837	0.402957	0.806533	0.514095	0.868333	0.692037	0.980334	0.926915
FR721	320	0.919331	0.597776	0.904864	0.658549	0.91176	0.746944	0.933549	0.814473	0.9481	0.873197	0.976477	0.951658
FR722	260	0.937434	0.576461	0.932924	0.646054	0.938049	0.736002	0.948894	0.81909	0.95831	0.89255	0.971829	0.948432
FR723	260	0.870725	0.467581	0.87418	0.511306	0.884725	0.563922	0.903044	0.632929	0.936156	0.748702	0.97849	0.951805
FR724	470	0.912775	0.485732	0.900499	0.516764	0.896529	0.563328	0.910579	0.638345	0.920324	0.746477	0.979591	0.952686
FR811	438	0.851598	0.346698	0.843815	0.371439	0.865482	0.419222	0.896992	0.524063	0.92031	0.651898	0.979235	0.939359
FR812	353	0.733388	0.317303	0.742638	0.337955	0.786142	0.390739	0.826474	0.510875	0.876344	0.682893	0.983675	0.947573
FR813	343	0.888508	0.293387	0.868103	0.289179	0.8385	0.302395	0.850237	0.414712	0.881591	0.629603	0.986995	0.94943
FR814	185	0.881742	0.549318	0.862764	0.60072	0.862855	0.654963	0.880858	0.717965	0.921879	0.822956	0.974262	0.941815
FR815	226	0.816533	0.291463	0.808653	0.306083	0.828227	0.355772	0.864076	0.456829	0.898971	0.631868	0.966932	0.919349
FR821	200	0.724855	0.331999	0.734096	0.346145	0.769627	0.408756	0.819409	0.515667	0.878398	0.659931	0.976797	0.938592
FR822	172	0.769639	0.364493	0.772225	0.37691	0.802659	0.418968	0.822165	0.509382	0.862208	0.67368	0.97276	0.924929
FR823	163	0.658131	0.238339	0.658122	0.270395	0.721289	0.376664	0.782298	0.484611	0.839144	0.625864	0.954137	0.913076
FR824	120	0.574666	0.264878	0.593058	0.354104	0.668561	0.52454	0.789813	0.693623	0.901904	0.857801	0.994627	0.973992
FR825	153	0.886532	0.277218	0.864299	0.285321	0.84728	0.323702	0.848311	0.448829	0.880047	0.641348	0.992394	0.957695
FR826	151	0.877535	0.328797	0.87222	0.350707	0.891953	0.403093	0.890534	0.528596	0.923846	0.69247	0.983835	0.943284
FR831	124	0.917343	0.440161	0.910716	0.482733	0.908288	0.526162	0.865576	0.578754	0.914275	0.740611	0.977615	0.932209
FR832	236	0.89618	0.453421	0.904123	0.503959	0.883836	0.549961	0.842653	0.576188	0.88961	0.713734	0.947154	0.869876
HR031	36	0.89697	0.305481	0.89763	0.416638	0.849456	0.599047	0.851143	0.699648	0.944802	0.720843	0.992122	0.970528
HR032	12	0.92591	0.731977	0.914083	0.71561	0.927927	0.760137	0.929338	0.795828	0.930697	0.871653	0.973927	0.956296
HR033	34	0.94529	0.429817	0.916282	0.496353	0.864299	0.569021	0.883046	0.648845	0.971101	0.719282	0.987237	0.944674
HR034	20	0.87529	0.499049	0.876008	0.529087	0.854515	0.580527	0.875313	0.637417	0.954814	0.81479	0.975231	0.948522
HR035	55	0.934643	0.322212	0.936719	0.367129	0.917235	0.44778	0.909796	0.548428	0.97455	0.612785	0.988299	0.958091
HR036	41	0.922823	0.482579	0.955784	0.528669	0.917653	0.580196	0.894212	0.675098	0.95913	0.736157	0.987303	0.9633
HR037	22	0.916516	0.404349	0.926413	0.430752	0.921058	0.563528	0.913606	0.656202	0.972184	0.724374	0.981658	0.935166
HR041	1	0.99711	0.99711	0.993188	0.993188	0.997387	0.997387	0.999673	0.999673	1	0.987453	1	0.998173
HR042	34	0.88081	0.493681	0.880504	0.511412	0.886649	0.55992	0.907628	0.656344	0.964895	0.772428	0.993587	0.981702
HR043	32	0.908604	0.695984	0.926029	0.743618	0.941014	0.799326	0.952874	0.846683	0.972516	0.898586	0.985082	0.967504
HR044	28	0.942787	0.666507	0.946374	0.724235	0.956667	0.82156	0.96674	0.896334	0.99002	0.940835	0.989096	0.980355
HR045	25	0.934994	0.589669	0.942079	0.644116	0.949901	0.721287	0.952637	0.789828	0.962914	0.839025	0.994181	0.98265
HR046	25	0.888262	0.52422	0.90803	0.612796	0.941458	0.730602	0.968949	0.858783	0.986796	0.905483	0.980446	0.96801
HR047	23	0.935315	0.57904	0.942626	0.620344	0.944451	0.692815	0.942956	0.749112	0.959455	0.822566	0.990924	0.984648
HR048	16	0.936386	0.627366	0.942089	0.646117	0.955886	0.728386	0.961564	0.781195	0.987632	0.896416	0.993461	0.99006
HR049	10	0.919771	0.671827	0.943522	0.76697	0.952162	0.817032	0.958702	0.866108	0.988593	0.920145	0.994383	0.990631
HR04A	28	0.936069	0.600416	0.93201	0.66399	0.918494	0.745584	0.915863	0.844002	0.956842	0.87675	0.946641	0.938144
HR04B	42	0.920671	0.506712	0.935165	0.584797	0.950222	0.742754	0.948438	0.836031	0.992692	0.914148	0.990014	0.982532
HR04C	31	0.879494	0.382715	0.893137	0.593626	0.926389	0.727957	0.934464	0.787681	0.971435	0.874952	0.954791	0.950677
HR04D	22	0.941592	0.602487	0.948485	0.663776	0.94204	0.752572	0.932278	0.789495	0.974143	0.875066	0.974429	0.960793
HR04E	19	0.882618	0.616919	0.878771	0.665715	0.894428	0.749605	0.89634	0.762522	0.91355	0.857189	0.919519	0.918636
HU101	1	1	0.999093	1	0.976915	0.994503	0.994503	0.986728	0.986728	1	0.991176	0.996888	0.996888
HU102	187	0.820241	0.229489	0.824078	0.291992	0.83402	0.364318	0.843978	0.436068	0.879202	0.581094	0.977735	0.967151
HU211	108	0.889542	0.42075	0.894162	0.47526	0.854665	0.581762	0.869068	0.691321	0.919753	0.783554	0.990323	0.972265
HU212	76	0.943436	0.296055	0.936255	0.405078	0.92655	0.623675	0.933421	0.752183	0.9508	0.794579	0.981593	0.970748
HU213	216	0.965796	0.312607	0.954684	0.398318	0.949056	0.578356	0.954648	0.749323	0.961965	0.835793	0.98106	0.955429
HU221	183	0.9724	0.252222	0.953447	0.335772	0.933995	0.475646	0.942142	0.601474	0.952457	0.661061	0.984236	0.961139
HU222	216	0.964034	0.431559	0.962055	0.539797	0.962972	0.70817	0.961525	0.800015	0.970893	0.843226	0.990936	0.962463
HU223	258	0.959336	0.393232	0.957891	0.484878	0.955807	0.636728	0.954044	0.742144	0.9583	0.806352	0.976665	0.935885
HU231	301	0.979471	0.365963	0.964812	0.48459	0.957101	0.658777	0.950768	0.753132	0.969284	0.812112	0.978936	0.946077
HU232	246	0.949347	0.531169	0.953787	0.629003	0.965169	0.757537	0.956618	0.826222	0.970526	0.865757	0.982581	0.948558
HU233	109	0.956758	0.551656	0.961791	0.635932	0.971389	0.775578	0.975971	0.884661	0.980101	0.915996	0.990084	0.974358
HU311	358	0.924438	0.37036	0.932631	0.531184	0.941396	0.762012	0.934444	0.829458	0.949463	0.863631	0.984614	0.942196
HU312	121	0.935472	0.568385	0.938335	0.686238	0.952776	0.838838	0.950829	0.880746	0.969099	0.906974	0.985396	0.960849
HU313	131	0.941547	0.589634	0.950226	0.707869	0.964387	0.830816	0.967924	0.88358	0.970846	0.920162	0.991509	0.97193
HU321	82	0.950673	0.318708	0.946782	0.350676	0.951772	0.544045	0.957364	0.676111	0.970632	0.736537	0.997693	0.944527
HU322	78	0.950842	0.614462	0.949313	0.698616	0.968711	0.860675	0.96776	0.915984	0.977865	0.945696	0.998266	0.988385
HU323	229	0.948079	0.501573	0.940391	0.57518	0.954756	0.70552	0.95986	0.800833	0.969735	0.873682	0.989079	0.94168
HU331	119	0.96136	0.592636	0.961402	0.68325	0.972689	0.802899	0.972859	0.875498	0.982682	0.909444	0.988285	0.977847
HU332	75	0.964623	0.638925	0.973501	0.732784	0.967925	0.813856	0.975291	0.875852	0.987666	0.921032	0.995897	0.982516
HU333	60	0.978448	0.426578	0.972509	0.536626	0.955145	0.728069	0.940685	0.778985	0.976877	0.805215	0.989344	0.976613
IE011	515	0.888025	0.535462	0.878544	0.571308	0.879972	0.589638	0.894605	0.623528	0.89994	0.710932	0.960367	0.923116
IE012	346	0.842767	0.503001	0.833751	0.528372	0.856382	0.574679	0.862004	0.607713	0.899225	0.713177	0.962819	0.930144
IE013	504	0.88459	0.585015	0.88093	0.637312	0.888052	0.672562	0.901901	0.721048	0.917895	0.791901	0.965047	0.928035
IE021	322	0.795699	0.506608	0.781304	0.499045	0.759679	0.512002	0.800766	0.599905	0.855349	0.719166	0.932056	0.847426
IE022	263	0.863248	0.422585	0.893661	0.441204	0.885653	0.517446	0.894154	0.579008	0.902149	0.717815	0.960577	0.928057
IE023	409	0.865059	0.564435	0.863272	0.592923	0.88682	0.628128	0.894171	0.658397	0.907445	0.765646	0.959533	0.921652
IE024	517	0.852857	0.559836	0.850087	0.574364	0.868053	0.585924	0.882733	0.62532	0.894021	0.717079	0.955882	0.913888
IE025	565	0.822029	0.49934	0.835175	0.524587	0.858534	0.563034	0.880499	0.603178	0.907537	0.704911	0.961979	0.914004
IM000	1	1	0.967953	1	0.966563	1	0.968319	1	0.971602	1	0.972425	1	0.969515
IS001	1	1	0.784832	1	0.87274	1	0.935534	1	0.979107	0.90965	0.90965	1	0.972901
IS002	73	0.849292	0.212255	0.84717	0.2543	0.881437	0.409167	0.898152	0.492413	0.926347	0.664912	0.99266	0.947044
ITC11	315	0.882503	0.261894	0.827355	0.315233	0.843823	0.464269	0.900846	0.524041	0.935709	0.624331	0.976181	0.932405
ITC12	86	0.95973	0.414374	0.961005	0.594001	0.963786	0.683036	0.9719	0.722395	0.969883	0.842131	0.985965	0.970964
ITC13	82	0.873932	0.532248	0.887524	0.629412	0.898007	0.701885	0.916651	0.732419	0.948491	0.852472	0.953635	0.896761
ITC14	77	0.938276	0.450734	0.924096	0.497518	0.94123	0.594638	0.953322	0.6372	0.941899	0.774876	0.957791	0.911945
ITC15	88	0.895179	0.286578	0.890312	0.352044	0.898752	0.438959	0.905529	0.480824	0.930103	0.630262	0.979914	0.964225
ITC16	250	0.909145	0.409319	0.904908	0.44125	0.910409	0.513549	0.938987	0.58797	0.948804	0.719209	0.979418	0.941573
ITC17	118	0.971024	0.586135	0.954571	0.662784	0.937439	0.712656	0.952935	0.749662	0.956981	0.825669	0.973592	0.940778
ITC18	190	0.960406	0.526609	0.942393	0.641252	0.943457	0.733184	0.95498	0.772207	0.957665	0.831611	0.972315	0.942305
ITC20	74	0.901443	0.342069	0.883952	0.383752	0.878075	0.499154	0.903671	0.612228	0.921784	0.750154	0.969137	0.93221
ITC31	67	0.930004	0.419302	0.937049	0.503382	0.936338	0.605709	0.947801	0.632716	0.954386	0.742113	0.969924	0.914348
ITC32	69	0.847618	0.484052	0.845164	0.579088	0.883915	0.703611	0.914618	0.731243	0.938371	0.813239	0.976595	0.959612
ITC33	67	0.929683	0.405913	0.904448	0.586181	0.880711	0.697732	0.961339	0.75302	0.956972	0.829573	0.979328	0.9378
ITC34	32	0.886244	0.466372	0.892096	0.561545	0.904309	0.704812	0.939564	0.716193	0.958289	0.806234	0.978667	0.959011
ITC41	141	0.732915	0.186482	0.726802	0.290233	0.793647	0.445189	0.847604	0.525397	0.89103	0.65396	0.967889	0.92042
ITC42	160	0.714388	0.336382	0.727039	0.410896	0.769249	0.506364	0.82781	0.580975	0.900939	0.70411	0.970296	0.918963
ITC43	90	0.648412	0.286984	0.674008	0.37323	0.755668	0.493854	0.821573	0.58523	0.899873	0.74302	0.960739	0.912107
ITC44	78	0.910486	0.42382	0.888762	0.484557	0.893119	0.591404	0.912023	0.671805	0.937722	0.797256	0.972527	0.918653
ITC46	244	0.773948	0.18912	0.7722	0.262446	0.813192	0.349473	0.864587	0.426021	0.894607	0.599048	0.966841	0.911725
ITC47	206	0.786949	0.213366	0.758386	0.257403	0.780266	0.337254	0.815695	0.41456	0.881251	0.583691	0.979848	0.95092
ITC48	190	0.907631	0.337136	0.867339	0.403198	0.853081	0.48061	0.867665	0.519915	0.909556	0.677818	0.97898	0.950031
ITC49	61	0.898871	0.212842	0.85257	0.308311	0.826998	0.383988	0.837676	0.443201	0.861394	0.634302	0.968566	0.960235
ITC4A	115	0.839983	0.342335	0.842998	0.397753	0.838983	0.489362	0.866616	0.555454	0.901594	0.752122	0.98282	0.964889
ITC4B	70	0.903977	0.461792	0.894723	0.492152	0.898895	0.553291	0.909982	0.62084	0.928472	0.739701	0.989454	0.978386
ITC4C	134	0.677759	0.251979	0.734378	0.38123	0.770698	0.494547	0.833892	0.565069	0.890805	0.686131	0.971827	0.911142
ITC4D	55	0.707144	0.230254	0.68705	0.325887	0.78681	0.388455	0.841832	0.460949	0.902578	0.550876	0.968561	0.929806
ITF11	108	0.970849	0.383228	0.9619	0.427235	0.95948	0.514045	0.956592	0.631507	0.963311	0.802474	0.991137	0.97557
ITF12	47	0.911475	0.441914	0.907805	0.487979	0.901502	0.552759	0.922704	0.641143	0.935684	0.738893	0.975671	0.950087
ITF13	46	0.972648	0.348835	0.974025	0.43379	0.971515	0.481118	0.975361	0.53043	0.966228	0.591782	0.976752	0.904883
ITF14	104	0.953657	0.441907	0.949126	0.469314	0.951052	0.53079	0.954501	0.625954	0.960846	0.74698	0.978479	0.944705
ITF21	52	0.970111	0.390284	0.971143	0.474038	0.94929	0.597273	0.963185	0.706823	0.966503	0.848504	0.989642	0.971613
ITF22	84	0.968989	0.40498	0.968068	0.462658	0.950523	0.583348	0.959851	0.714892	0.961615	0.83611	0.989017	0.97802
ITF31	104	0.870079	0.320938	0.853144	0.382964	0.856829	0.460788	0.886706	0.555731	0.917465	0.687847	0.979982	0.924625
ITF32	78	0.902341	0.530207	0.885443	0.549772	0.879269	0.628389	0.914088	0.717954	0.942316	0.823466	0.982345	0.963923
ITF33	92	0.751209	0.271142	0.749909	0.348012	0.788149	0.480076	0.843814	0.582179	0.903336	0.766244	0.965393	0.921581
ITF34	119	0.897652	0.628475	0.879534	0.661984	0.909672	0.727689	0.924477	0.764618	0.946699	0.849261	0.976748	0.949851
ITF35	158	0.927814	0.378973	0.924212	0.417125	0.928824	0.470014	0.938877	0.519326	0.951128	0.659971	0.981009	0.946759
ITF43	29	0.841777	0.33962	0.782899	0.353801	0.822671	0.539194	0.86095	0.646606	0.903448	0.768894	0.985075	0.978358
ITF44	20	0.746605	0.413666	0.751388	0.505321	0.815743	0.673849	0.884512	0.773367	0.934111	0.836784	0.996322	0.973738
ITF45	97	0.844741	0.427938	0.845992	0.477399	0.871107	0.614928	0.893146	0.707897	0.927713	0.795244	0.985972	0.960249
ITF46	61	0.914645	0.372967	0.918221	0.397919	0.936869	0.443646	0.957467	0.489729	0.969844	0.677854	0.994221	0.961392
ITF47	41	0.753663	0.256788	0.733684	0.308177	0.751546	0.495138	0.818868	0.661193	0.890886	0.806579	0.98985	0.956859
ITF48	10	0.916092	0.221838	0.914374	0.254822	0.877679	0.337848	0.886741	0.53035	0.943558	0.671127	0.996625	0.953807
ITF51	100	0.946963	0.448681	0.938754	0.479958	0.944303	0.597837	0.960719	0.694744	0.975185	0.845453	0.99254	0.974802
ITF52	31	0.924273	0.315717	0.921117	0.319637	0.939457	0.353632	0.95148	0.501844	0.967184	0.693361	0.996313	0.955079
ITF61	155	0.911778	0.404346	0.908859	0.410438	0.90348	0.545237	0.927448	0.640418	0.946937	0.752283	0.980621	0.937616
ITF62	27	0.926889	0.345858	0.936266	0.36714	0.942205	0.555747	0.951519	0.657113	0.954817	0.703072	0.9944	0.975557
ITF63	80	0.940581	0.470743	0.933064	0.521595	0.93458	0.607185	0.942684	0.719978	0.936897	0.801954	0.973156	0.934744
ITF64	50	0.932777	0.484686	0.894666	0.480225	0.902197	0.593606	0.920259	0.715387	0.946417	0.812208	0.971795	0.923075
ITF65	97	0.928318	0.465799	0.927827	0.512028	0.938041	0.61072	0.960892	0.682766	0.97103	0.787451	0.97778	0.948952
ITG11	24	0.886023	0.442657	0.89091	0.47068	0.923325	0.523301	0.94128	0.619973	0.9598	0.74511	0.989938	0.958927
ITG12	82	0.959688	0.197125	0.937885	0.218381	0.91066	0.270625	0.916102	0.351084	0.932022	0.528368	0.985889	0.916943
ITG13	108	0.890148	0.416147	0.889876	0.46756	0.898743	0.558814	0.921355	0.615759	0.948178	0.783686	0.984002	0.938978
ITG14	43	0.913456	0.445459	0.919333	0.459871	0.939843	0.569088	0.956119	0.659387	0.962825	0.760931	0.991867	0.97382
ITG15	22	0.944609	0.452148	0.937356	0.454205	0.94797	0.468359	0.955873	0.482093	0.969009	0.611434	0.997313	0.978721
ITG16	20	0.910594	0.669348	0.936873	0.663699	0.930927	0.711046	0.947097	0.787251	0.958966	0.843133	0.99263	0.988373
ITG17	58	0.767533	0.16213	0.7537	0.206618	0.784066	0.310596	0.838455	0.445587	0.894281	0.624018	0.983987	0.939216
ITG18	12	0.809615	0.511579	0.812331	0.5188	0.867999	0.602216	0.913383	0.673248	0.948634	0.722661	0.996182	0.97555
ITG19	21	0.839619	0.518426	0.833934	0.517058	0.872133	0.594547	0.900026	0.676622	0.945391	0.741009	0.98758	0.963069
ITG25	66	0.918402	0.200211	0.929645	0.206256	0.944706	0.244857	0.949709	0.301405	0.95217	0.505074	0.993291	0.965329
ITG26	52	0.861122	0.246683	0.84655	0.260124	0.850321	0.430351	0.877767	0.564161	0.950386	0.729891	0.995201	0.973209
ITG27	71	0.863493	0.125179	0.850702	0.124387	0.897786	0.168333	0.920875	0.231148	0.926181	0.365349	0.990647	0.920317
ITG28	88	0.921405	0.309825	0.905916	0.355703	0.901748	0.462829	0.921864	0.587868	0.944625	0.740412	0.985932	0.968681
ITG29	26	0.873937	0.318842	0.877599	0.336485	0.902011	0.362963	0.911416	0.381061	0.931596	0.556959	0.988537	0.951085
ITG2A	23	0.855641	0.499717	0.840799	0.491818	0.889309	0.621786	0.886022	0.651389	0.920016	0.760807	0.989091	0.97378
ITG2B	28	0.919615	0.241872	0.919544	0.269633	0.934214	0.344462	0.94157	0.490628	0.951283	0.64022	0.99584	0.978664
ITG2C	23	0.940269	0.272692	0.935329	0.335015	0.90486	0.428346	0.918863	0.575274	0.948336	0.704115	0.996138	0.972839
ITH10	116	0.908503	0.371392	0.906545	0.40602	0.901367	0.464334	0.915073	0.544674	0.919639	0.707722	0.979295	0.945286
ITH20	217	0.809177	0.298986	0.804298	0.334013	0.819837	0.412013	0.864027	0.482949	0.920337	0.648336	0.971148	0.915886
ITH31	98	0.959729	0.241289	0.908432	0.294273	0.880532	0.369279	0.891591	0.472107	0.900789	0.647327	0.981073	0.960778
ITH32	121	0.826911	0.270383	0.801732	0.308637	0.828257	0.420774	0.855809	0.512304	0.906839	0.713243	0.976502	0.950539
ITH33	69	0.926873	0.48031	0.909112	0.494385	0.920088	0.632799	0.931095	0.697149	0.965577	0.842427	0.990352	0.965543
ITH34	95	0.859491	0.271344	0.821302	0.300324	0.835123	0.412637	0.854388	0.504958	0.901264	0.686416	0.980576	0.965233
ITH35	44	0.829563	0.344653	0.798849	0.375028	0.810218	0.443764	0.843247	0.51219	0.885902	0.64888	0.980433	0.968823
ITH36	104	0.879948	0.294969	0.865441	0.325274	0.851887	0.400719	0.868693	0.474796	0.896946	0.624504	0.982208	0.949904
ITH37	50	0.935803	0.467544	0.935258	0.497406	0.932345	0.64268	0.94053	0.739482	0.949289	0.855365	0.987498	0.970655
ITH41	51	0.879981	0.252671	0.886484	0.361198	0.895812	0.45369	0.920819	0.484476	0.93847	0.63168	0.987953	0.973664
ITH42	136	0.88312	0.353411	0.891018	0.43343	0.920185	0.560714	0.930563	0.626214	0.94381	0.736709	0.986296	0.973714
ITH43	25	0.908435	0.375189	0.905983	0.447101	0.915882	0.577091	0.932029	0.611737	0.93953	0.721025	0.98518	0.972087
ITH44	6	0.772618	0.692038	0.77059	0.73331	0.789765	0.770483	0.856204	0.823807	0.915971	0.894418	0.933413	0.913488
ITH51	48	0.911802	0.368632	0.907717	0.471306	0.900759	0.50361	0.918389	0.568321	0.938419	0.674169	0.985029	0.955256
ITH52	47	0.962206	0.334294	0.905981	0.352085	0.873158	0.423164	0.897371	0.479276	0.928049	0.59063	0.984671	0.960727
ITH53	45	0.950492	0.304277	0.929321	0.36042	0.90926	0.413967	0.896009	0.425824	0.91504	0.593716	0.984783	0.955829
ITH54	47	0.931303	0.292833	0.894072	0.334883	0.897988	0.440277	0.895856	0.466529	0.922233	0.651693	0.990377	0.97166
ITH55	60	0.918589	0.326004	0.836433	0.377942	0.81234	0.492216	0.861392	0.569563	0.911144	0.66888	0.985202	0.944322
ITH56	26	0.91816	0.467112	0.921475	0.502264	0.922305	0.625015	0.936491	0.64567	0.941207	0.683174	0.992684	0.985688
ITH57	18	0.888668	0.510599	0.900954	0.531607	0.90616	0.597592	0.908037	0.624908	0.898876	0.727696	0.989598	0.9791
ITH58	30	0.922855	0.347465	0.884777	0.416267	0.888454	0.494639	0.903324	0.534157	0.94447	0.645256	0.986624	0.928869
ITH59	27	0.869988	0.497213	0.836152	0.542809	0.84382	0.633404	0.854901	0.678442	0.890851	0.779304	0.971013	0.931208
ITI11	17	0.866296	0.642809	0.862407	0.714904	0.904906	0.797155	0.92947	0.860092	0.965737	0.931006	0.995151	0.977298
ITI12	35	0.91227	0.511894	0.910287	0.581394	0.927394	0.653646	0.932468	0.682723	0.949738	0.799405	0.98444	0.963354
ITI13	22	0.794112	0.423672	0.767739	0.419378	0.761682	0.433224	0.869347	0.665118	0.925705	0.795602	0.986218	0.978385
ITI14	44	0.914418	0.360562	0.864563	0.40557	0.840318	0.54224	0.888332	0.598605	0.931602	0.678817	0.971039	0.892342
ITI15	7	0.808796	0.411591	0.825429	0.410618	0.846421	0.440985	0.937841	0.759318	0.948538	0.880552	0.988588	0.972476
ITI16	20	0.859948	0.373438	0.872189	0.401249	0.91436	0.604508	0.916873	0.662389	0.917617	0.772982	0.993409	0.920791
ITI17	39	0.816916	0.468438	0.801259	0.521258	0.817445	0.603905	0.843275	0.64215	0.894439	0.731786	0.982364	0.948557
ITI18	39	0.924699	0.355925	0.916371	0.398544	0.920621	0.493829	0.926308	0.546824	0.942855	0.68487	0.987297	0.965342
ITI19	36	0.902353	0.374263	0.909821	0.459527	0.923838	0.575077	0.935587	0.603052	0.93951	0.715535	0.990614	0.980183
ITI1A	28	0.954553	0.493834	0.968161	0.572965	0.971799	0.627784	0.969438	0.668177	0.973588	0.780416	0.993709	0.974322
ITI21	59	0.942651	0.390229	0.940772	0.443031	0.940139	0.501304	0.946045	0.535523	0.949154	0.631998	0.98631	0.962714
ITI22	33	0.972149	0.378679	0.96045	0.400873	0.948936	0.48329	0.954504	0.539096	0.961872	0.664555	0.981517	0.962839
ITI31	60	0.880115	0.362823	0.810572	0.469161	0.839816	0.540579	0.869836	0.606003	0.920159	0.767082	0.976902	0.958721
ITI32	49	0.859577	0.376701	0.846676	0.411404	0.846661	0.459502	0.862265	0.500617	0.895203	0.693786	0.977146	0.943205
ITI33	57	0.895759	0.335886	0.890876	0.38491	0.904404	0.462695	0.928069	0.513482	0.948727	0.609281	0.988749	0.968194
ITI34	33	0.910401	0.343224	0.877004	0.399506	0.888469	0.470355	0.922807	0.573083	0.945304	0.652512	0.990133	0.944786
ITI35	40	0.914694	0.334845	0.893439	0.414473	0.911421	0.535593	0.925151	0.584196	0.953103	0.679643	0.981766	0.948817
ITI41	60	0.859057	0.309506	0.87125	0.317799	0.863495	0.362644	0.861801	0.522738	0.902423	0.686872	0.98964	0.981713
ITI42	73	0.94618	0.439131	0.92659	0.479702	0.929369	0.531931	0.932203	0.595226	0.937432	0.724637	0.974595	0.951351
ITI43	121	0.924536	0.274611	0.929021	0.27304	0.917316	0.314806	0.919562	0.366841	0.948546	0.4621	0.97224	0.917435
ITI44	33	0.934898	0.353254	0.889858	0.393569	0.89052	0.4478	0.89977	0.562801	0.918086	0.694749	0.987378	0.918703
ITI45	91	0.922742	0.438313	0.927021	0.501458	0.932913	0.574533	0.944138	0.687139	0.953736	0.781829	0.982846	0.96278
LI000	11	0.61373	0.144887	0.776692	0.147367	0.850099	0.33001	0.860008	0.501769	0.925674	0.775306	0.970852	0.943287
LT001	5	0.712289	0.44599	0.735683	0.450963	0.856789	0.622818	0.910863	0.795503	0.956679	0.915851	0.997115	0.99109
LT002	9	0.848626	0.745459	0.867865	0.743462	0.888736	0.762425	0.892387	0.846799	0.868499	0.834135	0.993169	0.979325
LT003	7	0.821104	0.58817	0.823574	0.560481	0.850832	0.581806	0.889998	0.641464	0.930071	0.88742	0.997085	0.955705
LT004	5	0.917149	0.699265	0.909454	0.656695	0.91161	0.734752	0.944918	0.869294	0.955252	0.911458	0.997874	0.984725
LT005	6	0.877118	0.736828	0.910232	0.777061	0.96677	0.863785	0.923232	0.872828	0.93213	0.895375	0.999122	0.997035
LT006	7	0.928609	0.857298	0.939865	0.835679	0.954374	0.837712	0.949945	0.89933	0.955228	0.929675	0.994547	0.984666
LT007	4	0.928402	0.770659	0.922666	0.737418	0.92422	0.745357	0.925181	0.781421	0.956441	0.874243	0.998607	0.990688
LT008	4	0.851209	0.558322	0.862867	0.581847	0.906393	0.670863	0.909162	0.696425	0.97143	0.912585	0.998618	0.994795
LT009	6	0.815341	0.669467	0.83315	0.707356	0.830397	0.680272	0.809958	0.716819	0.967374	0.944931	0.996429	0.990986
LT00A	8	0.943429	0.443625	0.950281	0.42218	0.956146	0.423037	0.953448	0.689965	0.985661	0.900399	0.997752	0.991389
LU000	106	0.893209	0.330135	0.880365	0.379533	0.861071	0.428368	0.842213	0.476363	0.870824	0.627894	0.949937	0.882152
LV003	20	0.948837	0.582253	0.949548	0.643492	0.944253	0.724522	0.908103	0.741314	0.969471	0.802396	0.967931	0.828739
LV005	21	0.905878	0.580526	0.920277	0.675864	0.9412	0.762128	0.932499	0.819537	0.941597	0.838242	0.971347	0.886039
LV006	1	1	0.999458	1	0.994376	1	0.993436	0.985276	0.985276	1	0.991903	1	0.995511
LV007	29	0.741324	0.386325	0.785876	0.43552	0.788121	0.468363	0.80652	0.561157	0.829001	0.602636	0.951423	0.87878
LV008	26	0.936981	0.669251	0.948112	0.72004	0.954166	0.756707	0.948559	0.828843	0.957241	0.859326	0.965329	0.886131
LV009	22	0.89197	0.596502	0.893665	0.630978	0.924531	0.720703	0.947295	0.803144	0.963132	0.823716	0.970231	0.89147
MC000	1	1	0.12738	1	0.142736	1	0.152174	1	0.204084	1	0.216584	1	0.229219
MT001	54	0.83608	0.406574	0.863336	0.441687	0.87257	0.518644	0.888668	0.644401	0.915564	0.754543	0.955117	0.846817
MT002	14	0.885021	0.339288	0.88471	0.326722	0.896183	0.384245	0.891859	0.517823	0.931725	0.717019	0.971708	0.876783
NL111	7	0.932509	0.741363	0.924597	0.762592	0.949988	0.848293	0.965186	0.915626	0.990451	0.983754	0.997234	0.991803
NL112	3	0.841436	0.611631	0.862758	0.642086	0.943337	0.896401	0.969206	0.949577	0.983351	0.970337	0.994523	0.991561
NL113	13	0.809423	0.40874	0.832435	0.459321	0.913542	0.591442	0.943412	0.729132	0.964646	0.799866	0.994215	0.993079
NL121	18	0.837606	0.434588	0.856448	0.46374	0.92348	0.569368	0.954575	0.668951	0.976873	0.769221	0.995313	0.990248
NL122	3	0.836079	0.56861	0.856341	0.601791	0.90642	0.700928	0.927179	0.80138	0.966123	0.937513	0.998901	0.995252
NL123	6	0.926912	0.867394	0.922506	0.873485	0.937489	0.854376	0.950362	0.86571	0.966021	0.919303	0.998152	0.995361
NL131	5	0.929409	0.837549	0.930449	0.849323	0.942441	0.818272	0.933024	0.770623	0.962945	0.895844	0.997888	0.994644
NL132	3	0.901494	0.717746	0.921486	0.734704	0.95606	0.761081	0.955072	0.754973	0.978835	0.910944	1	0.995487
NL133	4	0.845566	0.505958	0.855097	0.516205	0.895762	0.65764	0.95468	0.8814	0.950691	0.856568	0.996063	0.99514
NL211	8	0.797524	0.709245	0.797146	0.715002	0.879439	0.817022	0.945346	0.899004	0.968748	0.933629	0.995453	0.993109
NL212	3	0.71409	0.594604	0.763764	0.672512	0.858112	0.805147	0.945121	0.931265	0.974361	0.948193	1	0.994255
NL213	14	0.762623	0.470129	0.788388	0.534073	0.840346	0.674027	0.900887	0.785865	0.955244	0.901462	0.99588	0.99309
NL221	16	0.724578	0.41518	0.768983	0.493399	0.846734	0.660855	0.914342	0.824464	0.949173	0.886009	0.993247	0.990549
NL224	10	0.905574	0.740186	0.900096	0.750845	0.912337	0.775348	0.949055	0.872752	0.962541	0.922634	0.99458	0.991605
NL225	11	0.832888	0.653533	0.863287	0.728809	0.895927	0.799166	0.922365	0.848583	0.959845	0.910742	0.997055	0.991462
NL226	19	0.728975	0.501628	0.750207	0.542365	0.867235	0.702575	0.918031	0.839679	0.961988	0.918357	0.991399	0.986277
NL230	6	0.282076	0.138794	0.481894	0.352818	0.633498	0.480194	0.795179	0.732533	0.907934	0.878266	0.990014	0.990014
NL310	26	0.893592	0.232528	0.859514	0.276298	0.862291	0.43479	0.890207	0.642525	0.94342	0.812942	0.992494	0.987457
NL321	11	0.851117	0.597013	0.853376	0.615667	0.889327	0.702741	0.913169	0.808016	0.938289	0.879433	0.993976	0.990424
NL322	6	0.888284	0.440182	0.894476	0.559983	0.90944	0.687899	0.943325	0.826213	0.963541	0.923971	0.995195	0.981942
NL323	5	0.831123	0.238348	0.760452	0.442914	0.844927	0.630554	0.887841	0.7641	0.901914	0.805836	0.979623	0.974912
NL324	5	0.895055	0.605603	0.865248	0.622392	0.901795	0.736255	0.963785	0.880821	0.989907	0.945076	0.996922	0.989057
NL325	2	0.97259	0.74162	0.968625	0.656136	0.978663	0.718204	0.99476	0.909586	0.988747	0.985492	0.981571	0.97756
NL326	15	0.823765	0.224714	0.855899	0.30692	0.895631	0.415373	0.905717	0.627265	0.94724	0.815081	0.957787	0.950108
NL327	9	0.878196	0.626945	0.906853	0.712809	0.917491	0.734345	0.937955	0.783767	0.962218	0.865567	0.988553	0.978686
NL332	6	0.900755	0.357205	0.928259	0.391561	0.93613	0.481509	0.892585	0.72245	0.912178	0.802967	0.987568	0.969819
NL333	3	0.857615	0.405697	0.875273	0.451982	0.915961	0.761838	0.904805	0.859435	0.943454	0.928546	0.957915	0.95376
NL337	12	0.847879	0.395216	0.856125	0.493248	0.872871	0.587676	0.916328	0.763441	0.939404	0.830912	0.977147	0.964336
NL338	10	0.775356	0.409981	0.808069	0.506856	0.851363	0.606942	0.918446	0.783661	0.937228	0.883712	0.990368	0.977223
NL339	24	0.824704	0.248566	0.826147	0.320557	0.841268	0.406695	0.893287	0.65025	0.927376	0.827632	0.987476	0.984137
NL33A	12	0.820613	0.424931	0.847124	0.506993	0.877944	0.631275	0.91639	0.782183	0.965795	0.940822	0.989802	0.982507
NL341	3	0.849078	0.357834	0.893727	0.555634	0.948395	0.788955	0.957815	0.860207	0.982391	0.932762	1	0.979766
NL342	10	0.867843	0.584618	0.875204	0.594754	0.893494	0.657859	0.936153	0.835756	0.947774	0.90173	0.997492	0.995251
NL411	13	0.728482	0.594926	0.787436	0.672024	0.861399	0.761204	0.925058	0.851018	0.970479	0.941719	0.9968	0.992626
NL412	13	0.806062	0.431076	0.834237	0.499443	0.898894	0.670294	0.941273	0.781417	0.95727	0.85389	0.995792	0.96959
NL413	20	0.720651	0.448976	0.764379	0.494834	0.82577	0.588886	0.861443	0.665484	0.948402	0.881315	0.994299	0.992396
NL414	21	0.851806	0.275751	0.850813	0.319543	0.88541	0.530187	0.912309	0.670977	0.958426	0.844944	0.99484	0.99054
NL421	8	0.758235	0.484863	0.817696	0.56659	0.900736	0.678374	0.930743	0.72148	0.962915	0.8769	0.998111	0.994597
NL422	7	0.843025	0.523355	0.851177	0.629517	0.871994	0.729262	0.9247	0.842897	0.94571	0.897422	0.998073	0.991706
NL423	18	0.763287	0.509482	0.80089	0.587861	0.891575	0.746322	0.954248	0.905795	0.994028	0.978005	0.99695	0.98195
NO011	1	1	0.930842	1	0.938548	1	0.930076	1	0.965907	1	0.969169	1	0.96757
NO012	22	0.823512	0.38368	0.835537	0.470651	0.857794	0.534962	0.865315	0.621502	0.906727	0.741464	0.993026	0.952736
NO021	22	0.941619	0.561925	0.95455	0.644437	0.963715	0.699	0.967924	0.78005	0.982826	0.872845	0.998369	0.968752
NO022	26	0.95222	0.581306	0.947141	0.647765	0.957463	0.728953	0.966611	0.805405	0.983587	0.894465	0.997775	0.976882
NO031	18	0.897778	0.557955	0.890782	0.626238	0.913058	0.680536	0.94772	0.744209	0.968998	0.786523	0.99563	0.923439
NO032	21	0.939929	0.424912	0.949429	0.622612	0.959449	0.663226	0.954751	0.69159	0.967954	0.752448	0.99753	0.945559
NO033	14	0.901031	0.495325	0.905645	0.530001	0.903374	0.658214	0.909561	0.747232	0.954894	0.855255	0.998677	0.931943
NO034	18	0.914876	0.594896	0.935091	0.666631	0.963345	0.72601	0.978434	0.779568	0.986061	0.86519	0.999078	0.969372
NO041	15	0.923144	0.538653	0.923918	0.614486	0.94937	0.646433	0.966189	0.707853	0.962634	0.742196	0.999282	0.913949
NO042	15	0.89476	0.442272	0.911111	0.511284	0.933619	0.608765	0.95217	0.693065	0.963529	0.733504	1	0.91988
NO043	26	0.812717	0.42324	0.847191	0.539072	0.886769	0.596501	0.929483	0.669635	0.963534	0.729122	0.998795	0.908497
NO051	33	0.928841	0.428845	0.934894	0.509817	0.963118	0.58434	0.981859	0.615971	0.985062	0.619516	0.999793	0.892625
NO052	26	0.92024	0.594261	0.922345	0.654871	0.957745	0.748344	0.975791	0.818354	0.990202	0.890798	1	0.932941
NO053	36	0.925289	0.578606	0.941794	0.637219	0.958666	0.676496	0.970655	0.725975	0.98399	0.803215	0.999893	0.921648
NO061	25	0.939639	0.505928	0.961934	0.591852	0.973878	0.646485	0.984496	0.67409	0.989712	0.704444	0.999961	0.932319
NO062	23	0.914309	0.550122	0.964409	0.60355	0.966274	0.63666	0.976991	0.707551	0.987906	0.783148	0.999963	0.919473
NO071	44	0.948277	0.490783	0.963812	0.567317	0.977621	0.678091	0.986234	0.764429	0.996463	0.830121	1	0.886765
NO072	24	0.970166	0.497299	0.975954	0.558999	0.982312	0.602152	0.987934	0.621689	0.994976	0.763741	1	0.902544
NO073	19	0.905989	0.387726	0.909598	0.513767	0.94431	0.640186	0.972742	0.72431	0.992419	0.794151	0.998487	0.887592
PL113	1	0.990406	0.990406	1	0.993552	0.997378	0.997378	0.990925	0.990925	0.971012	0.971012	1	0.999938
PL114	27	0.860429	0.52183	0.890036	0.574615	0.8926	0.623451	0.906824	0.693929	0.969273	0.756145	0.994449	0.980641
PL115	53	0.945387	0.548918	0.939472	0.570121	0.941907	0.684423	0.951544	0.783196	0.959734	0.831143	0.991012	0.98252
PL116	51	0.925814	0.549062	0.9337	0.571133	0.950916	0.715869	0.96337	0.838683	0.970537	0.882126	0.995053	0.987267
PL117	45	0.93219	0.560915	0.940552	0.577345	0.941451	0.662183	0.971875	0.843237	0.97594	0.893657	0.992368	0.987193
PL121	65	0.930499	0.599297	0.937659	0.597447	0.951431	0.654424	0.952365	0.772779	0.955122	0.834043	0.993494	0.988387
PL122	91	0.926689	0.553231	0.935027	0.549974	0.940668	0.617537	0.957834	0.769597	0.971334	0.85559	0.994203	0.986229
PL127	1	0.987071	0.987071	1	0.997033	0.993703	0.993703	1	0.996553	0.987176	0.987176	0.999726	0.999726
PL128	51	0.927829	0.476067	0.936603	0.5169	0.950921	0.601384	0.949447	0.773566	0.952423	0.838654	0.993227	0.989435
PL129	58	0.872887	0.399725	0.8851	0.43051	0.887111	0.468811	0.885088	0.516423	0.90773	0.567605	0.990233	0.980859
PL12A	48	0.848355	0.402605	0.85491	0.448279	0.846235	0.459319	0.860492	0.49807	0.90359	0.604255	0.984962	0.970814
PL213	1	0.984573	0.984573	1	0.99896	0.994686	0.994686	0.992612	0.992612	0.980849	0.980849	0.998045	0.998045
PL214	53	0.875186	0.473145	0.872532	0.506078	0.892803	0.566325	0.9128	0.639103	0.945458	0.713949	0.995633	0.962268
PL215	58	0.867473	0.533353	0.87865	0.558395	0.886222	0.603818	0.886827	0.673149	0.932438	0.792093	0.992528	0.979861
PL216	39	0.874899	0.477892	0.872228	0.520749	0.852053	0.605061	0.878267	0.756922	0.944694	0.839924	0.989308	0.979939
PL217	31	0.938821	0.578971	0.948912	0.603274	0.950321	0.677258	0.961216	0.755894	0.96476	0.805285	0.993768	0.988028
PL224	31	0.94013	0.362032	0.950538	0.429275	0.946395	0.629979	0.942001	0.764352	0.954619	0.852975	0.996419	0.989903
PL225	38	0.872879	0.35862	0.877505	0.390459	0.875594	0.523763	0.86616	0.587152	0.930527	0.735402	0.992127	0.971401
PL227	25	0.817742	0.416212	0.844928	0.51884	0.849395	0.707362	0.891858	0.839363	0.948165	0.912506	0.988232	0.973465
PL228	19	0.831604	0.549174	0.867808	0.614277	0.905264	0.734821	0.911181	0.818322	0.955841	0.917583	0.984383	0.981525
PL229	10	0.863189	0.764603	0.923816	0.8343	0.926745	0.856825	0.93736	0.894993	0.959987	0.862049	0.994754	0.982493
PL22A	6	0.868607	0.589817	0.883678	0.686795	0.870845	0.781146	0.903656	0.896866	0.959101	0.937538	0.989843	0.982801
PL22B	21	0.919069	0.328653	0.926148	0.372047	0.943269	0.571689	0.953055	0.748831	0.960021	0.798867	0.991849	0.986873
PL22C	17	0.806242	0.354133	0.824785	0.371252	0.82248	0.604739	0.905655	0.713393	0.925447	0.838943	0.989125	0.981347
PL311	43	0.909779	0.568782	0.91813	0.542231	0.927909	0.615628	0.941801	0.745281	0.957615	0.832107	0.982883	0.962707
PL312	77	0.945773	0.592432	0.944743	0.57687	0.945364	0.683159	0.961771	0.826593	0.978493	0.910654	0.995348	0.989449
PL314	41	0.978267	0.479548	0.988956	0.462231	0.98349	0.489491	0.950926	0.542584	0.961487	0.659969	0.992663	0.984095
PL315	52	0.930283	0.636844	0.933489	0.703031	0.942506	0.809496	0.963147	0.871315	0.978124	0.908677	0.992324	0.986476
PL323	43	0.927751	0.522478	0.931082	0.534342	0.941345	0.641849	0.931654	0.744473	0.945034	0.804604	0.994532	0.986195
PL324	39	0.917423	0.552208	0.924934	0.601939	0.920643	0.686234	0.933091	0.799489	0.959228	0.880112	0.992002	0.985978
PL325	38	0.921342	0.571476	0.931152	0.574476	0.946834	0.632034	0.946189	0.710587	0.957514	0.789385	0.993874	0.987651
PL326	40	0.898276	0.429439	0.910745	0.435918	0.92475	0.581794	0.932332	0.757705	0.960889	0.855614	0.99378	0.986668
PL331	44	0.935353	0.454633	0.946993	0.453994	0.947308	0.582638	0.933586	0.705896	0.961211	0.810904	0.993802	0.988636
PL332	58	0.918232	0.658173	0.939665	0.711354	0.955014	0.814134	0.976667	0.907624	0.980291	0.930107	0.994577	0.988174
PL343	26	0.895971	0.468733	0.919914	0.495167	0.945009	0.545528	0.965661	0.593232	0.978212	0.667067	0.993589	0.985148
PL344	57	0.917469	0.618351	0.934261	0.596023	0.943762	0.650056	0.960404	0.794558	0.97525	0.890547	0.996312	0.991222
PL345	35	0.934782	0.66019	0.949487	0.650631	0.95509	0.658838	0.968205	0.73654	0.977895	0.845659	0.99613	0.989468
PL411	37	0.89462	0.486299	0.90976	0.496045	0.921546	0.608374	0.932933	0.772105	0.960104	0.860484	0.991656	0.985853
PL414	58	0.923411	0.548574	0.937504	0.567447	0.930135	0.649404	0.927826	0.763067	0.954695	0.851281	0.992057	0.984512
PL415	1	0.985251	0.985251	1	0.999198	0.991232	0.991232	0.985346	0.985346	0.971097	0.971097	0.997678	0.997678
PL416	50	0.942174	0.47853	0.950471	0.489004	0.946868	0.581201	0.944799	0.700489	0.959743	0.789311	0.99567	0.990671
PL417	43	0.854123	0.507734	0.867281	0.517588	0.887075	0.640353	0.909429	0.748627	0.943486	0.838334	0.997255	0.993444
PL418	37	0.810913	0.328912	0.805217	0.324826	0.805506	0.381484	0.831375	0.449047	0.886656	0.566	0.995733	0.987642
PL422	49	0.898613	0.524373	0.91206	0.516543	0.933737	0.540195	0.940549	0.648531	0.949302	0.717363	0.995557	0.991448
PL423	38	0.897966	0.486622	0.894898	0.51662	0.907616	0.64959	0.919087	0.71262	0.961493	0.825583	0.995598	0.993587
PL424	1	0.977963	0.977963	0.993104	0.993104	0.984112	0.984112	0.985137	0.985137	0.960846	0.960846	1	0.99328
PL425	26	0.866795	0.225072	0.854575	0.255439	0.841804	0.346427	0.845403	0.515493	0.90986	0.576254	0.990749	0.981958
PL431	29	0.889555	0.409817	0.918969	0.462081	0.941555	0.520126	0.939421	0.59932	0.95231	0.716622	0.995866	0.985164
PL432	54	0.911008	0.377996	0.923988	0.389266	0.937909	0.477632	0.939474	0.623775	0.952424	0.71391	0.99166	0.979047
PL514	1	0.987051	0.987051	1	0.996278	0.994553	0.994553	0.987272	0.987272	0.97163	0.97163	0.998005	0.998005
PL515	51	0.895656	0.465899	0.91707	0.550739	0.919461	0.643363	0.928426	0.758688	0.954633	0.824995	0.990526	0.969911
PL516	29	0.871995	0.309972	0.903556	0.368159	0.931774	0.476146	0.929922	0.555673	0.941799	0.612095	0.987644	0.979697
PL517	45	0.887913	0.50642	0.906327	0.562091	0.93268	0.668056	0.939526	0.757223	0.950845	0.78689	0.983467	0.970416
PL518	43	0.846525	0.394764	0.850814	0.471007	0.854077	0.509456	0.877532	0.609648	0.913708	0.696617	0.996898	0.99277
PL521	28	0.921171	0.495553	0.933897	0.568313	0.943827	0.698626	0.959821	0.813112	0.967654	0.868701	0.997804	0.994081
PL522	43	0.899905	0.418185	0.917393	0.484619	0.944347	0.704117	0.960377	0.831253	0.969812	0.880563	0.996209	0.991673
PL613	19	0.899414	0.38768	0.881943	0.368512	0.831812	0.561575	0.869346	0.650269	0.912033	0.707039	0.990193	0.985971
PL614	56	0.904937	0.662283	0.9281	0.697486	0.928757	0.743957	0.937533	0.828071	0.961162	0.861042	0.992172	0.986482
PL615	69	0.904954	0.636811	0.895318	0.688493	0.91654	0.755776	0.942548	0.818928	0.958548	0.851967	0.992125	0.98457
PL621	44	0.894585	0.587057	0.904129	0.582988	0.931183	0.628463	0.942914	0.685172	0.951655	0.765103	0.995933	0.989762
PL622	47	0.891826	0.532381	0.910987	0.5476	0.928398	0.584738	0.943397	0.620018	0.944163	0.698222	0.987314	0.981422
PL623	25	0.906088	0.550938	0.921147	0.567057	0.934277	0.589522	0.937916	0.646385	0.951134	0.765559	0.984555	0.979431
PL631	38	0.895494	0.417451	0.914135	0.424762	0.93398	0.483256	0.921134	0.587023	0.950429	0.716944	0.996207	0.988793
PL633	3	0.884779	0.521153	0.881896	0.554978	0.875197	0.599889	0.890149	0.700001	0.887335	0.743907	0.986618	0.974636
PL634	38	0.822501	0.297591	0.805265	0.349598	0.822847	0.41059	0.832205	0.440504	0.86347	0.534928	0.983657	0.969322
PL635	44	0.922853	0.469756	0.931175	0.463023	0.938621	0.512502	0.932165	0.628246	0.958432	0.746395	0.9953	0.988501
PT111	10	0.918762	0.745804	0.910565	0.752616	0.927258	0.803766	0.956475	0.864481	0.972295	0.921682	0.995392	0.987119
PT112	6	0.836564	0.670789	0.83093	0.670093	0.856335	0.744329	0.870285	0.770093	0.932164	0.854385	0.998126	0.99452
PT113	8	0.878215	0.694103	0.880698	0.711668	0.900445	0.771123	0.918522	0.823635	0.972731	0.889951	0.995392	0.987565
PT114	9	0.813366	0.461089	0.828426	0.493345	0.858075	0.567776	0.8859	0.623417	0.935169	0.733919	0.993026	0.984104
PT115	15	0.920365	0.677749	0.928695	0.710714	0.937438	0.754264	0.941392	0.799935	0.967877	0.898378	0.99592	0.992775
PT116	5	0.844161	0.613062	0.862089	0.783123	0.833533	0.769661	0.872438	0.830003	0.977487	0.964296	0.993804	0.980984
PT117	19	0.956508	0.75433	0.971667	0.804413	0.970706	0.810994	0.979819	0.870239	0.989885	0.924671	0.996739	0.990968
PT118	14	0.902394	0.613031	0.930639	0.678308	0.939488	0.724653	0.952907	0.809244	0.981253	0.907438	0.999064	0.99634
PT150	16	0.876538	0.582488	0.909147	0.641068	0.92798	0.69847	0.931848	0.726569	0.960904	0.781242	0.996708	0.994078
PT161	12	0.84859	0.563742	0.848092	0.557471	0.862803	0.600128	0.856039	0.63188	0.917468	0.863609	0.996484	0.994992
PT162	8	0.929725	0.728406	0.936888	0.764686	0.941136	0.797081	0.944833	0.7873	0.963077	0.863889	0.996417	0.993449
PT163	5	0.88764	0.647358	0.911007	0.697814	0.935359	0.744108	0.941639	0.76944	0.978081	0.944732	0.99784	0.994642
PT164	14	0.914104	0.718789	0.920677	0.730914	0.923817	0.738091	0.940643	0.815025	0.972603	0.903799	0.99454	0.988372
PT165	15	0.963581	0.753992	0.961006	0.735815	0.973028	0.779781	0.979054	0.803988	0.989036	0.89623	0.997269	0.993757
PT166	5	0.867955	0.723148	0.867476	0.71236	0.865507	0.737362	0.875406	0.781386	0.918236	0.862965	0.995484	0.993232
PT167	3	0.932303	0.737534	0.962605	0.817902	0.958113	0.825819	0.965509	0.870808	0.980643	0.920062	0.999288	0.996047
PT168	9	0.943274	0.654827	0.953879	0.697157	0.959151	0.737034	0.965386	0.789369	0.981119	0.8645	0.998915	0.993863
PT169	4	0.919792	0.509183	0.936515	0.550015	0.954321	0.652932	0.967109	0.755723	0.985839	0.873636	0.998994	0.992048
PT16A	3	0.997365	0.947098	1	0.989872	0.988439	0.96796	0.980356	0.89075	0.992188	0.960683	0.998479	0.995228
PT16B	12	0.911904	0.737818	0.920776	0.756618	0.928041	0.782162	0.914199	0.781788	0.924518	0.802176	0.993433	0.989424
PT16C	10	0.898794	0.690931	0.870278	0.721435	0.931841	0.786693	0.94041	0.827278	0.96705	0.935352	0.995569	0.993683
PT171	9	0.788095	0.29501	0.824144	0.411076	0.819905	0.515732	0.841304	0.57131	0.944729	0.835598	0.994568	0.989268
PT172	9	0.854893	0.278604	0.87143	0.38779	0.846022	0.549642	0.824419	0.570069	0.874934	0.788615	0.990973	0.985207
PT181	5	0.841535	0.730709	0.854963	0.742421	0.903148	0.824574	0.916146	0.863867	0.964061	0.937609	0.996202	0.995366
PT182	15	0.917968	0.646561	0.937044	0.705985	0.955267	0.794055	0.965238	0.848318	0.983214	0.92099	0.995046	0.991744
PT183	14	0.917047	0.636226	0.936091	0.666724	0.9619	0.787943	0.968497	0.850475	0.990869	0.945455	0.998211	0.996342
PT184	13	0.940025	0.773058	0.971819	0.848858	0.963324	0.877545	0.971194	0.91396	0.98884	0.956145	0.998553	0.996922
PT185	11	0.87781	0.712436	0.904186	0.74916	0.926771	0.783909	0.92818	0.792908	0.961327	0.895359	0.993508	0.990503
RO111	101	0.944411	0.493541	0.964697	0.701942	0.971164	0.83047	0.953939	0.876458	0.954147	0.913899	0.987977	0.957345
RO112	62	0.927378	0.406026	0.931836	0.538888	0.93905	0.665857	0.947898	0.820001	0.963426	0.921866	0.995698	0.911722
RO113	81	0.968034	0.266105	0.968212	0.404297	0.97091	0.56483	0.967464	0.647004	0.960817	0.713762	0.987934	0.918365
RO114	76	0.942998	0.355001	0.942148	0.556522	0.952593	0.746164	0.951493	0.868794	0.950404	0.918121	0.989677	0.942077
RO115	65	0.928805	0.475079	0.940688	0.69179	0.953537	0.829271	0.948	0.89922	0.945305	0.929412	0.986818	0.955336
RO116	61	0.955509	0.516279	0.968039	0.638784	0.973803	0.735578	0.971152	0.855051	0.979457	0.910583	0.995102	0.952166
RO121	78	0.9573	0.481916	0.96285	0.638941	0.970097	0.757352	0.956809	0.818534	0.970445	0.882871	0.996616	0.925844
RO122	58	0.915656	0.174967	0.932248	0.288989	0.929315	0.596628	0.906785	0.848252	0.890753	0.869933	0.986772	0.920935
RO123	45	0.946697	0.395222	0.948267	0.561958	0.9408	0.780649	0.9232	0.899999	0.945486	0.93139	0.990218	0.957517
RO124	67	0.908479	0.434471	0.928413	0.643989	0.950608	0.801727	0.941208	0.896345	0.944326	0.928206	0.991547	0.962525
RO125	102	0.925615	0.425253	0.949963	0.681029	0.954106	0.824295	0.927097	0.87364	0.942196	0.919504	0.983743	0.946141
RO126	64	0.929249	0.331847	0.9442	0.66317	0.932322	0.810609	0.93253	0.820946	0.912636	0.873996	0.975883	0.903028
RO211	93	0.93425	0.284601	0.931552	0.490857	0.930306	0.637116	0.912572	0.766148	0.931425	0.90114	0.996674	0.899721
RO212	78	0.960769	0.554327	0.966931	0.677267	0.971125	0.785698	0.955624	0.878482	0.96171	0.923459	0.995302	0.930091
RO213	98	0.940541	0.266088	0.922766	0.410318	0.914821	0.592749	0.901901	0.714682	0.921054	0.843017	0.989533	0.928219
RO214	83	0.917589	0.288429	0.932981	0.512598	0.939387	0.680957	0.935662	0.819688	0.940672	0.885954	0.997991	0.865751
RO215	114	0.917248	0.466664	0.9097	0.616244	0.919469	0.739183	0.916048	0.830771	0.937278	0.917268	0.995595	0.909444
RO216	86	0.954728	0.510209	0.959656	0.680918	0.958004	0.78318	0.941096	0.869096	0.9575	0.918072	0.997247	0.920376
RO221	44	0.947371	0.235437	0.952825	0.485706	0.951632	0.719748	0.943803	0.842032	0.954918	0.909698	0.991159	0.946356
RO222	87	0.937164	0.491638	0.953143	0.671052	0.958595	0.789959	0.943398	0.862331	0.956832	0.905561	0.987555	0.950888
RO223	70	0.871653	0.225372	0.909092	0.26442	0.926205	0.337925	0.920504	0.706286	0.906914	0.810163	0.991263	0.928881
RO224	65	0.928499	0.242639	0.941509	0.318576	0.930679	0.576369	0.926039	0.750778	0.936075	0.889713	0.99483	0.910331
RO225	51	0.940182	0.352121	0.954102	0.563791	0.963432	0.718023	0.952687	0.835236	0.973911	0.891023	0.99932	0.901294
RO226	72	0.910851	0.411545	0.931932	0.578915	0.939507	0.689017	0.932812	0.814706	0.944002	0.874143	0.990848	0.886896
RO311	102	0.946695	0.431193	0.936573	0.527097	0.947185	0.708871	0.948464	0.84118	0.946808	0.908438	0.980141	0.95015
RO312	55	0.921184	0.56356	0.953488	0.754337	0.963359	0.832345	0.958523	0.894815	0.955808	0.918339	0.961184	0.939469
RO313	89	0.8995	0.501519	0.925764	0.683769	0.945648	0.819854	0.942398	0.888106	0.957316	0.92848	0.976413	0.946739
RO314	54	0.900916	0.716932	0.932976	0.747905	0.934199	0.792451	0.940091	0.837314	0.967249	0.884028	0.957474	0.940056
RO315	66	0.930868	0.482509	0.947057	0.659489	0.958234	0.795223	0.953785	0.892413	0.959104	0.931437	0.972294	0.934905
RO316	104	0.906972	0.340455	0.920412	0.539991	0.942784	0.734134	0.943968	0.865383	0.950842	0.915984	0.994804	0.946636
RO317	97	0.911976	0.561352	0.941835	0.711683	0.949509	0.779759	0.954975	0.830311	0.957998	0.897198	0.979412	0.937197
RO321	1	0.908247	0.908247	0.983238	0.983238	0.985093	0.985093	0.976243	0.976243	0.97406	0.97406	1	0.970212
RO322	40	0.812113	0.288502	0.827377	0.365868	0.838175	0.445017	0.828706	0.442669	0.866043	0.457665	0.851563	0.836814
RO411	111	0.960252	0.361935	0.961611	0.579143	0.966732	0.730966	0.959963	0.839794	0.963431	0.90214	0.982356	0.943475
RO412	70	0.946512	0.468742	0.925215	0.563914	0.92601	0.71477	0.934395	0.872181	0.943449	0.905379	0.991892	0.927202
RO413	66	0.947225	0.464534	0.947188	0.594442	0.956943	0.702178	0.952395	0.814079	0.950554	0.854272	0.988838	0.932159
RO414	112	0.941987	0.522467	0.957075	0.692118	0.962891	0.811303	0.950028	0.867048	0.951215	0.898556	0.981103	0.92934
RO415	89	0.960018	0.549203	0.94099	0.621781	0.946703	0.758811	0.93437	0.847872	0.936977	0.888892	0.996672	0.927104
RO421	78	0.936589	0.493745	0.958596	0.726382	0.947933	0.825338	0.94023	0.854495	0.949948	0.89504	0.998944	0.941248
RO422	77	0.94492	0.382612	0.961543	0.6577	0.974303	0.791183	0.97035	0.853201	0.969551	0.918529	0.985409	0.931849
RO423	69	0.926869	0.333057	0.944029	0.450189	0.954054	0.625057	0.95237	0.79471	0.951409	0.869164	0.996021	0.937833
RO424	100	0.925392	0.247994	0.94875	0.468701	0.951897	0.632554	0.928596	0.678727	0.935337	0.726775	0.967746	0.917089
SE110	26	0.870306	0.449535	0.84216	0.428034	0.878958	0.604121	0.90462	0.709109	0.939643	0.81165	0.977847	0.96861
SE121	8	0.754807	0.367702	0.79406	0.41515	0.865478	0.494524	0.912852	0.573393	0.935628	0.734385	0.988818	0.986418
SE122	9	0.900589	0.69668	0.919141	0.693691	0.943153	0.749687	0.956005	0.80669	0.973926	0.852995	0.993944	0.988078
SE123	13	0.941025	0.62854	0.952304	0.637657	0.968045	0.6482	0.982573	0.732202	0.984616	0.790526	0.99665	0.988381
SE124	12	0.932397	0.593391	0.931346	0.577788	0.950209	0.668757	0.971862	0.7783	0.980446	0.837687	0.994375	0.982828
SE125	10	0.964015	0.706494	0.975486	0.66264	0.981797	0.750847	0.985009	0.824129	0.99058	0.878619	0.995002	0.98987
SE211	13	0.879459	0.671432	0.899708	0.663343	0.943798	0.738114	0.968189	0.838329	0.975243	0.881621	0.994607	0.989675
SE212	8	0.927693	0.645415	0.940134	0.59103	0.945483	0.664862	0.970682	0.791203	0.975633	0.846664	0.994466	0.989238
SE213	12	0.926081	0.678583	0.931846	0.683823	0.967585	0.824612	0.984253	0.915912	0.992154	0.94244	0.999694	0.98167
SE214	1	1	0.990553	1	0.993894	1	0.993333	1	0.993381	1	0.993597	1	0.992771
SE221	5	0.944524	0.902586	0.980942	0.923188	0.985151	0.941727	0.992392	0.946849	0.996628	0.963663	1	0.981161
SE224	33	0.85897	0.464075	0.867943	0.46925	0.903376	0.622385	0.914996	0.734233	0.931632	0.809185	0.992563	0.988513
SE231	6	0.887881	0.68051	0.910148	0.715445	0.948857	0.783296	0.96755	0.815686	0.979171	0.848347	0.994665	0.990641
SE232	49	0.874935	0.39771	0.867403	0.442577	0.916219	0.599836	0.954968	0.730461	0.972812	0.800421	0.994665	0.985511
SE311	16	0.899355	0.680553	0.90737	0.657377	0.957915	0.829768	0.983793	0.903607	0.990625	0.940646	0.998378	0.987654
SE312	15	0.926611	0.640127	0.917193	0.661249	0.957068	0.835478	0.970438	0.913418	0.992831	0.954608	0.999378	0.992506
SE313	10	0.963317	0.704391	0.968492	0.730874	0.980583	0.886173	0.932832	0.85458	0.983539	0.945597	0.999073	0.987551
SE321	7	0.910499	0.700955	0.93873	0.775149	0.975603	0.897611	0.937931	0.858396	0.99051	0.940856	0.999814	0.977762
SE322	8	0.920946	0.500154	0.928134	0.571798	0.943823	0.760597	0.979842	0.879787	0.981148	0.913916	0.998471	0.985848
SE331	15	0.967873	0.535204	0.9732	0.497037	0.976066	0.49654	0.982529	0.643131	0.992387	0.822369	0.998731	0.979148
SE332	14	0.908513	0.475292	0.932391	0.528792	0.945319	0.598487	0.977461	0.807829	0.989562	0.912765	0.999476	0.984609
SI011	4	0.932178	0.817312	0.94245	0.842296	0.956359	0.893121	0.974124	0.929746	0.9699	0.930866	1	0.988545
SI012	7	0.961267	0.762724	0.964338	0.759012	0.962572	0.749654	0.9631	0.772427	0.968743	0.790271	0.998991	0.976053
SI013	4	0.85941	0.689363	0.877271	0.710158	0.850198	0.68383	0.878809	0.740808	0.910742	0.808653	0.999159	0.995859
SI014	8	0.902802	0.712273	0.919386	0.739489	0.925322	0.738491	0.92568	0.738027	0.934934	0.767445	0.998661	0.990131
SI015	3	0.975644	0.954037	0.990895	0.984503	0.972717	0.944385	0.978722	0.955863	0.970562	0.954538	0.998471	0.997905
SI016	3	0.994896	0.974978	0.994067	0.97934	0.995039	0.989222	0.972569	0.9594	0.976853	0.957457	1	0.990334
SI017	6	0.924627	0.68861	0.926854	0.689354	0.927929	0.685398	0.94604	0.804923	0.964419	0.867116	1	0.976259
SI018	3	0.90334	0.733215	0.902038	0.736838	0.880231	0.711717	0.890168	0.737614	0.915728	0.798095	0.999248	0.995855
SI021	7	0.791043	0.605864	0.802221	0.607281	0.841274	0.650553	0.870219	0.675625	0.921485	0.758148	0.997748	0.995555
SI022	5	0.858181	0.709125	0.87815	0.762175	0.889957	0.775552	0.922818	0.843154	0.95885	0.918789	0.998317	0.998317
SI023	4	0.917564	0.746365	0.930956	0.759528	0.942668	0.766113	0.930846	0.749339	0.95206	0.799534	0.998759	0.92261
SI024	4	0.807443	0.67237	0.788059	0.653705	0.856028	0.761388	0.89964	0.832157	0.93083	0.883897	0.998386	0.972937
SK010	89	0.937338	0.133282	0.934887	0.169375	0.899329	0.242082	0.829369	0.442784	0.835801	0.498797	0.962931	0.913257
SK021	251	0.871642	0.384909	0.878915	0.48434	0.878999	0.666493	0.874166	0.74208	0.881048	0.764699	0.980853	0.954382
SK022	276	0.949918	0.256392	0.953824	0.329501	0.944697	0.525521	0.928034	0.746306	0.925876	0.783631	0.975146	0.936881
SK023	354	0.960451	0.277806	0.956445	0.478346	0.958781	0.686225	0.944756	0.847218	0.940639	0.854259	0.982244	0.964439
SK031	315	0.91706	0.289072	0.91184	0.382005	0.910369	0.548363	0.897517	0.735109	0.910307	0.815596	0.967055	0.920502
SK032	516	0.963396	0.328538	0.953183	0.40458	0.946702	0.60538	0.922299	0.763059	0.927873	0.794491	0.973965	0.937204
SK041	665	0.950501	0.285523	0.957139	0.325844	0.940462	0.44341	0.924621	0.617828	0.934811	0.73202	0.976627	0.935744
SK042	461	0.940973	0.270093	0.932306	0.332232	0.934213	0.449357	0.911976	0.614717	0.920652	0.684004	0.972465	0.932029
SM000	1	0.94951	0.94951	0.951198	0.951198	0.949806	0.949806	0.948789	0.948789	0.949099	0.949099	0.950287	0.950287
UKC11	37	0.666207	0.461221	0.793157	0.625172	0.821595	0.691959	0.842019	0.739341	0.865649	0.781402	0.956813	0.904246
UKC12	45	0.713541	0.501159	0.822589	0.656644	0.898071	0.786522	0.908853	0.829546	0.929605	0.864804	0.955913	0.901213
UKC13	24	0.810071	0.54574	0.832695	0.626237	0.851798	0.686341	0.880294	0.757322	0.90421	0.784074	0.931882	0.852588
UKC14	63	0.778727	0.55011	0.848551	0.678993	0.879448	0.746522	0.903418	0.811802	0.923461	0.838574	0.973907	0.939346
UKC21	67	0.722106	0.407567	0.788621	0.56129	0.856459	0.693921	0.888125	0.779768	0.91622	0.824778	0.96154	0.917332
UKC22	86	0.783206	0.662476	0.85351	0.761207	0.852561	0.775633	0.889888	0.827816	0.915958	0.831262	0.965195	0.917608
UKC23	25	0.80162	0.591024	0.840364	0.691693	0.894399	0.804102	0.924833	0.884843	0.91681	0.856818	0.963754	0.928871
UKD11	69	0.806534	0.568042	0.865028	0.678874	0.885965	0.757128	0.91665	0.841936	0.946304	0.87746	0.959226	0.904724
UKD12	97	0.805125	0.57058	0.831831	0.622091	0.861632	0.682147	0.890386	0.75453	0.909354	0.781656	0.959079	0.903362
UKD31	113	0.783656	0.594908	0.859649	0.736188	0.855425	0.71408	0.863224	0.75636	0.881253	0.751219	0.962904	0.910592
UKD32	102	0.787969	0.495347	0.843393	0.659699	0.86482	0.730304	0.897534	0.812645	0.886281	0.7858	0.96497	0.92805
UKD41	23	0.771057	0.491957	0.831766	0.591379	0.874674	0.696482	0.886182	0.739384	0.913288	0.795947	0.935232	0.867246
UKD42	21	0.868168	0.678309	0.908164	0.778476	0.914531	0.820246	0.930886	0.873751	0.966619	0.917772	0.970849	0.927153
UKD43	258	0.656591	0.409194	0.756722	0.570466	0.83102	0.669424	0.876902	0.761175	0.926175	0.833002	0.953413	0.892028
UKD61	22	0.759182	0.406616	0.790914	0.51338	0.830333	0.657567	0.902775	0.76291	0.926785	0.814972	0.965681	0.926108
UKD62	52	0.79964	0.381479	0.828029	0.54944	0.857492	0.661317	0.885794	0.731274	0.911367	0.793504	0.972226	0.92839
UKD63	46	0.819466	0.405198	0.846832	0.584926	0.849456	0.654601	0.894826	0.774554	0.898497	0.802384	0.961661	0.926909
UKD71	58	0.627586	0.453561	0.774371	0.630167	0.871874	0.804564	0.881502	0.812876	0.881148	0.803295	0.95273	0.903401
UKD72	30	0.833068	0.730344	0.895448	0.819278	0.873809	0.777635	0.859775	0.784628	0.913594	0.809197	0.951127	0.881248
UKD73	22	0.714091	0.56872	0.855813	0.742263	0.916502	0.857123	0.938644	0.913711	0.934885	0.877541	0.960843	0.925077
UKD74	22	0.724769	0.579424	0.905201	0.822777	0.91807	0.854607	0.947763	0.921933	0.912089	0.835868	0.977463	0.950889
UKE11	23	0.7398	0.567399	0.798096	0.658371	0.860772	0.725914	0.868918	0.763377	0.909307	0.823375	0.96045	0.902903
UKE12	26	0.778088	0.365995	0.83501	0.521604	0.851369	0.63168	0.887268	0.762206	0.939884	0.867742	0.983982	0.969046
UKE13	32	0.810495	0.486871	0.860148	0.636707	0.884681	0.729496	0.903509	0.783434	0.929707	0.822327	0.967048	0.924302
UKE21	22	0.8538	0.430337	0.883421	0.560065	0.88299	0.611848	0.857507	0.683707	0.929833	0.783078	0.96926	0.916667
UKE22	173	0.805003	0.46646	0.819595	0.551754	0.824832	0.614905	0.872602	0.733536	0.934728	0.8422	0.969923	0.939642
UKE31	63	0.815758	0.573208	0.848435	0.684986	0.880122	0.769872	0.91015	0.8458	0.874917	0.789587	0.975855	0.951599
UKE32	28	0.789505	0.573828	0.869643	0.732796	0.892448	0.765326	0.898396	0.809268	0.891558	0.785966	0.970482	0.9241
UKE41	30	0.82654	0.540281	0.876592	0.680986	0.874604	0.705342	0.88104	0.759312	0.888115	0.763521	0.970779	0.935595
UKE42	33	0.830445	0.57187	0.852889	0.686937	0.840532	0.673918	0.853824	0.751294	0.888013	0.796786	0.97979	0.960014
UKE44	40	0.823589	0.563347	0.847872	0.648849	0.86311	0.701381	0.889762	0.782073	0.908769	0.809775	0.98016	0.955
UKE45	21	0.803496	0.546486	0.867094	0.698848	0.889558	0.77372	0.923551	0.866383	0.92755	0.868213	0.97546	0.94961
UKF11	17	0.729818	0.437507	0.782835	0.574142	0.839358	0.672024	0.883213	0.788958	0.906405	0.837038	0.964045	0.919805
UKF12	64	0.779782	0.502583	0.813455	0.576436	0.854547	0.685687	0.890445	0.776288	0.9274	0.832831	0.955185	0.896699
UKF13	113	0.816818	0.47115	0.836481	0.560741	0.86605	0.65371	0.894442	0.741474	0.936022	0.840206	0.962762	0.912522
UKF14	20	0.891698	0.742905	0.917823	0.812864	0.819172	0.66501	0.823869	0.728853	0.909113	0.803117	0.962302	0.894789
UKF15	101	0.773977	0.389245	0.848337	0.559465	0.855721	0.637872	0.878532	0.714653	0.888395	0.744456	0.952671	0.888474
UKF16	71	0.736821	0.431033	0.839518	0.612382	0.850302	0.663343	0.872751	0.752293	0.922286	0.83788	0.933753	0.878865
UKF21	22	0.789747	0.500658	0.8627	0.671014	0.872841	0.699105	0.871421	0.747421	0.919448	0.809774	0.960491	0.898685
UKF22	149	0.789986	0.301519	0.816954	0.441211	0.836888	0.580815	0.865463	0.676854	0.926064	0.797734	0.966865	0.925097
UKF24	76	0.78528	0.343653	0.84612	0.481818	0.826263	0.54727	0.857912	0.678206	0.895883	0.733182	0.958556	0.909966
UKF25	70	0.775486	0.378562	0.826349	0.48883	0.852129	0.57101	0.873284	0.662487	0.895483	0.722427	0.959181	0.902638
UKF30	180	0.802497	0.42709	0.816309	0.487227	0.836791	0.560009	0.86726	0.645741	0.909906	0.771386	0.96535	0.929464
UKG11	40	0.885334	0.635863	0.892749	0.650882	0.903114	0.70288	0.916603	0.769514	0.948727	0.879697	0.975673	0.955639
UKG12	121	0.78801	0.358002	0.822199	0.482732	0.850457	0.598993	0.885783	0.715061	0.929228	0.81734	0.953541	0.902167
UKG13	101	0.834414	0.41778	0.878014	0.545557	0.896519	0.616425	0.91063	0.702314	0.948573	0.791141	0.96567	0.92319
UKG21	33	0.679741	0.244207	0.676868	0.303998	0.773173	0.493492	0.830277	0.636005	0.928698	0.807884	0.956456	0.885406
UKG22	63	0.836118	0.505394	0.851452	0.576512	0.849705	0.616747	0.873874	0.724901	0.890848	0.775842	0.96319	0.916381
UKG23	37	0.863904	0.674027	0.90363	0.765789	0.892723	0.778851	0.904239	0.831701	0.906892	0.83167	0.945452	0.863013
UKG24	174	0.749852	0.399707	0.794083	0.548315	0.840101	0.682648	0.869599	0.767498	0.927109	0.852211	0.958568	0.912697
UKG31	40	0.861969	0.719572	0.894773	0.775623	0.886477	0.762354	0.876995	0.801104	0.915376	0.820433	0.970436	0.929197
UKG32	17	0.770198	0.400776	0.828611	0.636043	0.856711	0.724484	0.896043	0.816823	0.914506	0.835393	0.970599	0.93524
UKG33	18	0.869277	0.675209	0.888482	0.770842	0.891079	0.785808	0.884765	0.817302	0.912021	0.837313	0.973915	0.945346
UKG36	24	0.71107	0.524376	0.872084	0.665427	0.911071	0.808729	0.938758	0.889096	0.955914	0.904929	0.981337	0.951578
UKG37	24	0.847651	0.695073	0.925638	0.861606	0.912641	0.840208	0.915958	0.852624	0.93773	0.871906	0.954563	0.903571
UKG38	20	0.822099	0.554882	0.893111	0.783106	0.905605	0.833124	0.9185	0.87582	0.92613	0.868988	0.973328	0.960092
UKG39	20	0.790346	0.639432	0.884875	0.758372	0.912852	0.821342	0.927168	0.863225	0.9407	0.868122	0.963001	0.909249
UKH11	24	0.78652	0.351272	0.779813	0.451824	0.852412	0.565408	0.879776	0.683328	0.909755	0.730511	0.960454	0.900956
UKH12	123	0.741126	0.295778	0.796385	0.410437	0.816542	0.484434	0.846486	0.636114	0.900727	0.757572	0.961824	0.915404
UKH13	205	0.798404	0.415102	0.822167	0.512709	0.849813	0.601873	0.87901	0.716198	0.93109	0.842963	0.964151	0.937494
UKH14	175	0.793351	0.442162	0.824526	0.511086	0.858915	0.609038	0.887963	0.705267	0.931003	0.792982	0.963206	0.922982
UKH21	19	0.685613	0.409686	0.807517	0.546598	0.825832	0.592688	0.854308	0.681418	0.929457	0.835142	0.957432	0.887367
UKH23	186	0.666681	0.370187	0.762447	0.510491	0.813384	0.638408	0.854277	0.71934	0.920226	0.822128	0.955581	0.903903
UKH24	27	0.86633	0.481037	0.866569	0.595359	0.843094	0.606323	0.85593	0.658289	0.881876	0.743172	0.966885	0.917513
UKH25	31	0.69591	0.282021	0.809627	0.363177	0.846728	0.556522	0.881079	0.702643	0.906503	0.792424	0.965506	0.930491
UKH31	17	0.855612	0.574013	0.873245	0.655565	0.884258	0.704986	0.89203	0.777894	0.923073	0.818512	0.954624	0.877436
UKH32	20	0.75618	0.409512	0.819083	0.619055	0.814967	0.624991	0.822372	0.64104	0.908793	0.793183	0.947311	0.890076
UKH33	267	0.75625	0.303105	0.830542	0.488959	0.868705	0.624185	0.891192	0.724329	0.935241	0.823543	0.962119	0.916882
UKI11	117	0.859704	0.739076	0.862822	0.748221	0.751142	0.571273	0.711341	0.58849	0.840649	0.726657	0.912735	0.795596
UKI12	151	0.848973	0.700675	0.787907	0.641909	0.697747	0.503378	0.722813	0.561189	0.84011	0.720718	0.941589	0.855698
UKI21	135	0.783095	0.581084	0.790773	0.632256	0.801364	0.654193	0.819597	0.709016	0.89793	0.821199	0.963578	0.915292
UKI22	100	0.782834	0.545741	0.842727	0.66953	0.843817	0.679897	0.87978	0.751692	0.940885	0.868212	0.959112	0.908067
UKI23	146	0.822495	0.541005	0.837396	0.609266	0.824674	0.597934	0.829535	0.662662	0.914318	0.818894	0.955966	0.90149
UKJ11	126	0.741555	0.25167	0.77775	0.417392	0.812026	0.560997	0.858086	0.707807	0.924507	0.822255	0.957121	0.903131
UKJ12	23	0.414612	0.0964833	0.601189	0.112632	0.75198	0.248018	0.793028	0.46158	0.881775	0.671306	0.987279	0.963856
UKJ13	108	0.764156	0.361199	0.804131	0.561718	0.851597	0.677714	0.888703	0.765946	0.936051	0.846968	0.959916	0.924137
UKJ14	137	0.785779	0.330067	0.814006	0.468972	0.841118	0.574634	0.848266	0.703687	0.92999	0.830408	0.961881	0.921532
UKJ21	21	0.680923	0.383602	0.870524	0.667433	0.840821	0.620404	0.844022	0.716303	0.924866	0.829817	0.949172	0.880795
UKJ22	101	0.72757	0.327159	0.778219	0.477966	0.821478	0.577742	0.879592	0.733844	0.931105	0.835267	0.961644	0.9181
UKJ23	206	0.741354	0.388574	0.823168	0.595979	0.852294	0.673513	0.881164	0.769631	0.939005	0.858548	0.96241	0.917539
UKJ24	145	0.750342	0.299592	0.81215	0.442754	0.834572	0.562248	0.872282	0.693871	0.930975	0.825258	0.958542	0.908295
UKJ31	14	0.851713	0.659946	0.868927	0.677082	0.830845	0.615791	0.838626	0.724009	0.91492	0.816287	0.959393	0.901214
UKJ32	16	0.824685	0.52234	0.828398	0.585867	0.83994	0.630909	0.842102	0.68598	0.917525	0.815994	0.960409	0.900959
UKJ33	247	0.684572	0.248771	0.771225	0.388699	0.825277	0.551276	0.860118	0.71624	0.915558	0.806479	0.95416	0.899266
UKJ34	39	0.685987	0.36962	0.834108	0.586249	0.843786	0.641998	0.862418	0.742965	0.903545	0.801102	0.95129	0.889647
UKJ41	22	0.784093	0.482796	0.809917	0.599672	0.851083	0.712298	0.896828	0.813621	0.935858	0.866228	0.956661	0.912593
UKJ42	283	0.689707	0.374443	0.745146	0.52997	0.792781	0.604352	0.853331	0.718355	0.914796	0.817871	0.961084	0.911704
UKK11	35	0.840193	0.621491	0.854703	0.650441	0.827997	0.617966	0.840287	0.691694	0.90112	0.77432	0.964565	0.906146
UKK12	108	0.667664	0.286112	0.759508	0.470198	0.790528	0.584601	0.853989	0.725181	0.909634	0.813567	0.954296	0.905961
UKK13	142	0.809815	0.43266	0.848297	0.546873	0.874443	0.665212	0.893282	0.729143	0.936026	0.829604	0.96107	0.91477
UKK14	20	-99.99	-99.99	-99.99	-99.99	-99.99	-99.99	-99.99	-99.99	-99.99	-99.99	-99.99	-99.99
UKK15	98	0.761711	0.41401	0.754584	0.446716	0.800022	0.551519	0.829066	0.649105	0.862333	0.731001	0.96346	0.930375
UKK21	34	0.724453	0.400697	0.792833	0.501866	0.80512	0.500058	0.835155	0.661749	0.908754	0.792394	0.957406	0.902922
UKK22	125	0.747494	0.295033	0.747316	0.402067	0.828594	0.569989	0.864033	0.696394	0.921814	0.81175	0.954531	0.894475
UKK23	138	0.8111	0.422451	0.816466	0.480757	0.851306	0.5983	0.88098	0.716281	0.917198	0.797531	0.956915	0.906029
UKK30	128	0.779537	0.410154	0.811242	0.516371	0.834924	0.603227	0.888653	0.741454	0.8704	0.734564	0.948667	0.87631
UKK41	20	0.798797	0.515467	0.828565	0.635463	0.843429	0.724502	0.895848	0.828148	0.941418	0.845572	0.966536	0.903316
UKK42	15	0.6385	0.352943	0.848214	0.57007	0.873019	0.660895	0.901893	0.795132	0.947778	0.873695	0.944276	0.869005
UKK43	201	0.806356	0.457419	0.831591	0.519419	0.862425	0.617579	0.887318	0.728876	0.942395	0.840246	0.969067	0.932617
UKL11	40	0.824923	0.548515	0.808743	0.562282	0.884612	0.742405	0.902055	0.796588	0.922347	0.825315	0.956129	0.895991
UKL12	71	0.816613	0.487609	0.83868	0.566423	0.856894	0.61602	0.878826	0.730237	0.935731	0.827527	0.973176	0.926373
UKL13	68	0.842112	0.420216	0.855456	0.527481	0.870188	0.597751	0.897141	0.71334	0.948304	0.82505	0.96858	0.924381
UKL14	158	0.796614	0.502752	0.834191	0.582789	0.850703	0.62061	0.876094	0.702131	0.923858	0.797822	0.962756	0.913046
UKL15	63	0.722402	0.456847	0.823725	0.610208	0.856793	0.685446	0.888869	0.765623	0.924298	0.828469	0.950358	0.897889
UKL16	73	0.699348	0.373148	0.803347	0.583072	0.841732	0.689492	0.861079	0.748981	0.925586	0.817922	0.951982	0.888347
UKL17	81	0.74059	0.438968	0.819396	0.61671	0.861211	0.701429	0.885948	0.760473	0.919823	0.81582	0.947981	0.890472
UKL18	36	0.897729	0.37406	0.887331	0.514363	0.870779	0.544552	0.861429	0.638302	0.917752	0.725085	0.962563	0.909165
UKL21	62	0.805127	0.309546	0.86734	0.460945	0.876166	0.519944	0.868663	0.60131	0.905782	0.74139	0.943051	0.887956
UKL22	52	0.769137	0.432574	0.836738	0.525834	0.844811	0.576182	0.846436	0.655797	0.895118	0.745236	0.941293	0.871765
UKL23	104	0.635305	0.311549	0.718879	0.472933	0.828911	0.621018	0.865346	0.705561	0.914974	0.797894	0.941242	0.862121
UKL24	73	0.800621	0.464357	0.821056	0.527929	0.85326	0.646522	0.881827	0.765771	0.937433	0.861303	0.969726	0.937009
UKM21	16	0.824247	0.658661	0.835296	0.697196	0.856279	0.741283	0.920522	0.878121	0.921934	0.841359	0.92721	0.879831
UKM22	28	0.777491	0.507393	0.846855	0.622013	0.859387	0.670233	0.887354	0.792101	0.911983	0.812445	0.947205	0.885064
UKM23	13	0.762329	0.35639	0.829855	0.553862	0.865411	0.672769	0.881331	0.749115	0.894756	0.764286	0.918862	0.852798
UKM24	11	0.868362	0.675713	0.88794	0.729472	0.863718	0.70259	0.895594	0.811254	0.912976	0.812125	0.929314	0.867922
UKM25	17	0.885939	0.634974	0.881838	0.637238	0.831747	0.584901	0.855378	0.700453	0.898654	0.793582	0.944944	0.869115
UKM26	9	0.830118	0.533356	0.88948	0.693821	0.912324	0.795563	0.932156	0.897002	0.973418	0.947775	0.927292	0.878774
UKM27	19	0.778691	0.433139	0.85072	0.581974	0.867019	0.645598	0.872346	0.721314	0.921174	0.819775	0.953556	0.894354
UKM28	9	0.725409	0.33155	0.738006	0.408765	0.847176	0.657693	0.89239	0.793957	0.888937	0.772543	0.924049	0.863526
UKM31	14	0.736183	0.403425	0.809578	0.585003	0.844464	0.673104	0.912078	0.863709	0.925494	0.862398	0.986879	0.877133
UKM32	13	0.800948	0.510705	0.86202	0.650561	0.895961	0.747259	0.939	0.902655	0.928408	0.848943	0.930518	0.874858
UKM33	16	0.69296	0.362032	0.788083	0.535865	0.855507	0.672019	0.926187	0.820619	0.892991	0.75897	0.895308	0.832805
UKM34	21	0.863821	0.777437	0.874775	0.796806	0.869327	0.791541	0.894891	0.840206	0.928165	0.845259	0.94783	0.87328
UKM35	23	0.741929	0.490386	0.838858	0.655242	0.857335	0.713329	0.910944	0.857283	0.929482	0.858595	0.935488	0.889338
UKM36	20	0.62079	0.26513	0.819951	0.542349	0.85612	0.66785	0.893012	0.799969	0.921128	0.828814	0.920075	0.871985
UKM37	8	0.652933	0.428863	0.85313	0.680398	0.909352	0.800023	0.932716	0.902013	0.94478	0.879764	0.944411	0.893757
UKM38	20	0.686571	0.419465	0.81609	0.529877	0.826772	0.624803	0.883047	0.791822	0.922561	0.831345	0.943072	0.893538
UKM50	32	0.823043	0.555847	0.838595	0.61557	0.857351	0.67693	0.908407	0.842904	0.94181	0.888537	0.944945	0.905054
UKM61	10	0.696578	0.378799	0.852138	0.619573	0.875201	0.686076	0.905708	0.839497	0.916183	0.795256	0.931409	0.885451
UKM62	17	0.670375	0.290215	0.833986	0.526592	0.833343	0.554318	0.822209	0.56236	0.82404	0.549261	0.921492	0.889526
UKM63	15	0.808798	0.503257	0.877918	0.693745	0.890266	0.759122	0.939227	0.89695	0.949312	0.862856	0.877172	0.845822
UKM64	9	0.736804	0.440621	0.837094	0.612286	0.877488	0.725988	0.904712	0.815482	0.94023	0.857033	0.933815	0.89614
UKM65	6	0.813733	0.499479	0.867941	0.628249	0.88525	0.65649	0.88803	0.728991	0.888228	0.692602	0.905389	0.808427
UKM66	7	0.837466	0.58564	0.901223	0.770356	0.865924	0.693313	0.92983	0.859567	0.958538	0.862626	0.957787	0.893387
UKN01	51	0.824872	0.700625	0.848302	0.713118	0.843901	0.679503	0.871012	0.74815	0.895689	0.770757	0.912617	0.803513
UKN02	120	0.511166	0.247179	0.686169	0.398806	0.757256	0.514769	0.842217	0.630729	0.910426	0.742042	0.940914	0.843523
UKN03	147	0.684354	0.384027	0.71016	0.406363	0.775175	0.530775	0.835487	0.605458	0.895281	0.749953	0.961537	0.889717
UKN04	114	0.79343	0.477371	0.819324	0.513705	0.839443	0.593248	0.876538	0.685996	0.913187	0.757503	0.951063	0.861746
UKN05	150	0.839496	0.55742	0.854012	0.562027	0.857275	0.633984	0.875636	0.690745	0.909196	0.765715	0.969889	0.91477
VA000	1	0.319901	0.319901	0.356119	0.356119	0.332419	0.332419	0.302034	0.302034	0.285197	0.285197	0.28638	0.28638

## Sheet: Notes
Explanations to table
NUTS3	NUTS3 region code
Units	Number of LAU units
Correct_1960	Percentage score in 'correctness' (or 'hit rate')
Fit_1960	Percentage score in 'fit' (or 'success index')
	This color indicates that LAU-level population data were incomplete
	This color indicates that LAU-level population data were missing
The analysis uses LAU2 units, except:
Denmark, Greece, Lithuania, Portugal, Slovenia - LAU1 units used
Andorra, Isle of Man, Monaco, San Marino, Vatican - no subdivisions
Source of population data:
Gløersen, E. and Lüer, C. (2013) Population data collection for European local administrative units from 1960 onwards - final report. Spatial Foresight GmbH, Luxembourg, 17 pp. [data available at Eurostat, http://ec.europa.eu/eurostat/web/nuts/local-administrative-units]
Missing data summary (number of LAUs)
NUTS3	Total units	Missing units
CY000	614	240
IE011	515	16
IE012	346	3
IE013	504	7
IE023	409	4
IE024	517	5
IE025	565	2
UKC11	37	11
UKF24	76	16
UKG13	101	16
UKH23	186	10
UKJ33	247	13
UKK14	20	20
Note: for Cyprus, most of the missing units are located in Northern Cyprus, which is outside the HANZE domain
